# Supplementary material for: Functional annotation of the cattle genome through systematic discovery and characterization of chromatin states and butyrate-induced variations
Source: BMC Biol. 2019 Aug 16;17:68. doi: 10.1186/s12915-019-0687-8 (PMC6698049; doi:10.1186/s12915-019-0687-8)
Supplement: Supplementary file 2 — Table S1. Mapping summary of all the epigenome, RNA-seq, and DNA methylation data sets. (XLSX 17 kb) [file 12915_2019_687_MOESM2_ESM.xlsx]

## Sheet: Epigenomics Data sets
Table S1 Summary of all the epigenome, RNA-seq and DNA methylation data sets
Sample	Table unmber of clean reads	Total number of alignments (UMD3.1)	Unique alignments (without duplicate reads)	Final number of tags (-chrM, >chromsize)	Total Mappieng rates	Unique Mapping Rates
1_CTCF_CO	39610540	34652442	23328713	23205192	0.874829	0.588952
1_CTCF_BT	40990109	37448576	23331071	23225349	0.9136	0.569188
1_H3K27ac_CO	42565192	36737369	24488622	24412621	0.863085	0.57532
1_H3K27ac_BT	48050969	44040540	20627722	20565887	0.916538	0.429288
1_H3K27me3_CO	43699377	40031049	26146058	26053236	0.916055	0.598316
1_H3K27me3_BT	42961510	40131792	28969252	28861259	0.934134	0.674307
1_H3K4me1_CO	43243959	40767839	33001733	32915813	0.942741	0.763152
1_H3K4me1_BT	46973975	43593617	32865978	32783103	0.928038	0.699664
1_H3K4me3_CO	41860309	38598738	23586847	23473852	0.922084	0.563466
1_H3K4me3_BT	38952658	35316748	21164467	21092832	0.906658	0.543338
Background input for Study 1 on Rumen Epithelial cells	39941058	37593762	19832143	19627913	0.941231	0.496535
1a_ATAC_CO	65770274	64112148	48576756	46844788	0.974789	0.738582
1a_ATAC_CO	110735198	106996554	80616637	78815008	0.966238	0.728013
1a_ATAC_BT	105966982	103164222	76126402	74118627	0.973551	0.718397
1b_ATAC_BT	103071942	99766800	71420874	69218961	0.967934	0.692923
2_H3K9ac_CO	34901749	31420212	28278191	28278191	0.900247	0.810223
2_H3K27ac_CO	31806320	27471909	23625842	23625842	0.863725	0.742803
2_RNAploII_CO	34290473	30472134	27120199	27120199	0.888647	0.790896
2_H3K9me3_CO	25637999	22234708	19344196	19344196	0.867256	0.754513
2_H3K9ac_BT	41662779	37338807	33604926	33604926	0.896215	0.806593
2_H3K27ac_BT	26792557	24010273	21609246	21609246	0.896155	0.806539
2_RNAploII_BT	33024800	29576404	26618764	26618764	0.895582	0.806023
2_H3K9me3_BT	17001734	14667410	12613973	12613973	0.862701	0.741923
3_H3K9ac_CO	43982337	39346063	35017996	35017996	0.894588	0.796183
3_H3K27ac_CO	25847294	22744606	20015253	20015253	0.879961	0.774366
3_RNAploII_CO	25528251	22740240	20238814	20238814	0.890787	0.792801
3_H3K9me3_CO	27118166	22987828	19539654	19539654	0.847691	0.720537
3_H3K9ac_BT	35439106	31928015	28735214	28735214	0.900926	0.810833
3_H3K27ac_BT	30864645	27466533	24445214	24445214	0.889903	0.792013
3_RNAploII_BT	21501225	19379613	17441652	17441652	0.901326	0.811193
3_H3K9me3_BT	21140147	18451327	16052654	16052654	0.87281	0.759344
4_H3K9ac_CO	45839351	41202992	37082693	37082693	0.898856	0.808971
4_H3K27ac_CO	23429362	21065549	18958994	18958994	0.899109	0.809198
4_RNAploII_CO	25070481	22784118	20733547	20733547	0.908803	0.82701
4_H3K9me3_CO	29372419	26290884	23661796	23661796	0.895087	0.805579
4_H3K9ac_BT	36771561	33363488	30360774	30360774	0.907318	0.825659
4_H3K27ac_BT	36034952	32568244	29311420	29311420	0.903796	0.813416
4_RNAploII_BT	29704336	26006575	22885786	22885786	0.875514	0.770453
4_H3K9me3_BT	28483350	24742581	21526045	21526045	0.868668	0.755741
CJ25-Background Input For study 2-3 on rumen tissue	3247857	2881228	2564293	2564293	0.887117	0.789534
CJ26-Background Input For study 4 MDBK cells	5709815	4964263	4318909	4318909	0.869426	0.756401
						0.731993

## Sheet: RNA-seq data sets
Sample ID	# input clean reads	% uniquely mapped reads
Bulk_BT1	13620409	0.8676
Bulk_BT2	14279052	0.8721
Bulk_BT3	13129827	0.8702
Bulk_CO1	14783398	0.8675
Bulk_CO2	13355171	0.865
Bulk_CO3	14480258	0.869
	83648115	0.868567

## Sheet: WGBS data sets
Sample ID	Read end	# input clean reads	% uniquely mapped readsb	Bisulfite conversion rate (%)a
BT1	1	59291537	0.328	0.9845
BT2	2	62564879	0.3125	0.9845
BT3	1	58846980	0.3165	0.984
CO1	2	51863075	0.329	0.984
CO2	1	69327583	0.3145	0.9845
CO3	2	60279243	0.3115	0.984
a. The bisulfite conversion rate was estimated as 1 - % CpG methylation of lambda DNA; only provided for samples which have lambda DNA spiked in before library prep.
b. Some samples were aligned with low efficiency (i.e. <= 3%, highlighted in red); please be careful with these samples - maybe exclude them in initial analyses.
		362173297	0.318667
