# Supplementary material for: Functional annotation of the cattle genome through systematic discovery and characterization of chromatin states and butyrate-induced variations
Source: BMC Biol. 2019 Aug 16;17:68. doi: 10.1186/s12915-019-0687-8 (PMC6698049; doi:10.1186/s12915-019-0687-8)
Supplement: Supplementary file 4 — Table S3. Summary of upregulated differentially expressed genes (DEGs) detected in rumen epithelial primary cells (REPC) before and after (24 h) butyrate treatment. (XLSX 131 kb) [file 12915_2019_687_MOESM4_ESM.xlsx]

## Sheet: Sheet1
		Table S3. Summary of up-regulated differentially expressed genes (DEGs) detected in Rumen Epithelial Primary Cells (REPC) before and after (24-h) butyrate treatment.
Chromosome	start	end	Max.group.mean	Log..fold.change	Fold.change	P.value	FDR.p.value	Bonferroni	Name	Gene.stable.ID	Strand	Gene...GC.content	Gene.type	REPC_BT_state12to123	Rumen_BT_gain_H3K27c	Rumen_BT_gain_RNAployII	Rumen_weaning_gain_H3K9ac	Rumen_weaning_gain_H3K27c	Rumen_weaning_gain_RNAployII	MDBK_BT_gain_H3K9ac	MDBK_BT_gain_H3K27c	MDBK_BT_gain_RNAployII
1	100456488	100539394	16.93	2.89	7.43	0	0	0	SERPINI1	ENSBTAG00000012708	-1	38.2	protein_coding	F	F	F	F	F	F	T	T	T
1	10083035	10165613	25.54	2.21	4.61	0	0	0	JAM2	ENSBTAG00000000603	-1	40.18	protein_coding	F	F	F	F	F	F	T	T	T
1	112013084	112455492	2.43	2.23	4.68	0	0	0	KCNAB1	ENSBTAG00000018465	-1	41.11	protein_coding	F	F	F	F	F	F	T	T	T
1	114292426	114431455	0.5	3.63	12.35	1.04e-08	4.91e-08	0.000207	ARHGEF26	ENSBTAG00000013439	-1	40.98	protein_coding	T	T	F	F	F	F	T	T	T
1	129388513	129564179	0.94	2.24	4.71	3.17e-07	1.32e-06	0.00633	CLSTN2	ENSBTAG00000008714	-1	44.82	protein_coding	F	F	F	F	F	F	F	F	T
1	130588843	130615791	30.9	2.69	6.46	0	0	0	RBP1	ENSBTAG00000020028	1	49.2	protein_coding	F	T	F	T	F	F	T	F	F
1	136435602	136528516	7.83	2.8	6.97	0	0	0	SLCO2A1	ENSBTAG00000001324	1	48.45	protein_coding	T	T	F	F	T	F	F	F	T
1	136747035	136790649	1.19	8.43	345.09	0	0	0	gene:ENSBTAG00000023411	ENSBTAG00000023411	-1	44.93	protein_coding	T	T	F	F	F	F	T	T	T
1	137111101	137126880	1.56	2.48	5.58	2.02e-09	1.02e-08	4.03e-05	TMEM108	ENSBTAG00000018508	-1	53.31	protein_coding	F	F	F	F	F	F	F	F	F
1	138348896	138384864	0.99	3.47	11.05	1.26e-08	5.9e-08	0.000251	ACPP	ENSBTAG00000011634	-1	40.76	protein_coding	F	F	F	F	F	F	T	T	F
1	143990494	144053318	0.69	3.17	9.03	7.47e-08	3.28e-07	0.00149	ABCG1	ENSBTAG00000021272	1	51.39	protein_coding	F	F	F	F	F	F	F	F	F
1	144493957	144603437	6.04	2.54	5.81	0	0	0	PDE9A	ENSBTAG00000021899	1	50.51	protein_coding	T	F	F	F	T	F	T	T	T
1	146989244	147040968	80.45	2.29	4.88	0	0	0	COL18A1	ENSBTAG00000023907	1	59.16	protein_coding	F	T	F	F	F	F	F	T	F
1	147132679	147359843	8.08	2.43	5.4	0	0	0	PCBP3	ENSBTAG00000030775	1	46.76	protein_coding	T	F	F	F	F	F	T	T	T
1	3483533	3721930	0.35	2.21	4.62	1.02e-06	4.05e-06	0.02	TIAM1	ENSBTAG00000017839	1	43.86	protein_coding	F	T	F	F	F	F	T	T	T
1	43730028	44124279	56.98	2.14	4.4	0	0	0	CMSS1	ENSBTAG00000013663	1	39.72	protein_coding	F	T	F	T	T	F	T	T	T
1	45522505	45642829	5.11	4.17	17.98	0	0	0	gene:ENSBTAG00000048157	ENSBTAG00000048157	-1	38.48	protein_coding	F	F	F	F	F	F	T	T	T
1	45667461	45822623	7.23	5.07	33.61	0	0	0	ABI3BP	ENSBTAG00000026836	-1	40.78	protein_coding	F	T	F	F	T	F	T	T	T
1	53530575	53687569	0.38	3.83	14.2	1.73e-09	8.76e-09	3.46e-05	MYH15	ENSBTAG00000018399	-1	40.93	protein_coding	F	F	F	F	F	F	T	T	T
1	57178554	57192433	13.15	4.07	16.82	0	0	0	TAGLN3	ENSBTAG00000004599	1	47.85	protein_coding	F	F	F	F	F	F	T	T	F
1	58085014	58125875	1.52	4.79	27.59	0	0	0	CD200R1	ENSBTAG00000001235	-1	37.58	protein_coding	F	F	T	F	T	F	T	T	F
1	64576863	64605857	36.93	3.69	12.94	0	0	0	UPK1B	ENSBTAG00000009014	1	43.71	protein_coding	F	T	F	F	T	F	F	T	T
1	70126992	70250895	0.69	4.05	16.53	7.07e-09	3.4e-08	0.000141	SLC12A8	ENSBTAG00000000496	-1	44.66	protein_coding	F	F	F	T	T	F	T	T	T
1	83416532	83425904	6.89	2.04	4.13	0	0	0	CHRD	ENSBTAG00000002878	-1	59.15	protein_coding	T	F	F	F	T	F	T	T	F
1	83429600	83434371	1.73	2.62	6.14	3.4e-08	1.53e-07	0.000679	THPO	ENSBTAG00000000476	1	47.34	protein_coding	T	F	F	F	T	F	F	T	F
1	83443169	83457221	3.01	2.62	6.15	0	0	0	CLCN2	ENSBTAG00000012284	1	54.8	protein_coding	T	F	F	F	T	F	F	T	F
1	83546313	83557613	1.52	5.36	41	0	0	0	VWA5B2	ENSBTAG00000040399	-1	56.88	protein_coding	T	F	F	F	F	F	T	T	T
1	97788089	97802992	1.05	3.64	12.44	1.17e-11	6.89e-11	2.35e-07	CLDN11	ENSBTAG00000019060	-1	44.65	protein_coding	F	F	F	F	F	F	T	T	T
10	103508678	103703817	1.33	2.02	4.04	1.25e-12	7.89e-12	2.5e-08	RPS6KA5	ENSBTAG00000010906	-1	42.98	protein_coding	F	T	F	F	F	F	T	T	T
10	11563978	11652151	2.5	2.34	5.06	2.16e-11	1.24e-10	4.31e-07	TXNDC16	ENSBTAG00000010399	1	38.45	protein_coding	F	T	F	F	F	F	F	T	T
10	12264594	12291146	0.67	4.91	30.14	1.45e-14	1.04e-13	2.91e-10	IGDCC4	ENSBTAG00000006440	-1	53.23	protein_coding	T	F	F	F	T	F	T	F	F
10	13365616	13381791	0.63	7.42	171.75	4.83e-12	2.91e-11	9.64e-08	LCTL	ENSBTAG00000005214	-1	44.46	protein_coding	F	F	F	F	F	F	T	T	F
10	16192253	16247610	1.2	3.36	10.23	2e-06	7.72e-06	0.04	PAQR5	ENSBTAG00000020352	1	45.59	protein_coding	F	T	F	F	F	F	T	T	F
10	20695969	20698806	1.35	2.66	6.34	1.25e-06	4.95e-06	0.03	CIDEB	ENSBTAG00000010236	1	56.27	protein_coding	F	T	F	F	F	F	F	T	F
10	20904645	20921516	0.16	6.63	99.29	6.18e-07	2.51e-06	0.01	CARMIL3	ENSBTAG00000015208	-1	59.68	protein_coding	F	F	F	F	F	F	T	T	F
10	21206754	21214476	0.3	6.56	94.51	1.55e-06	6.08e-06	0.03	JPH4	ENSBTAG00000007104	1	56	protein_coding	F	F	F	F	F	F	F	F	T
10	21379413	21381885	2.8	2.44	5.43	1.72e-07	7.34e-07	0.00344	CMTM5	ENSBTAG00000032709	-1	59.36	protein_coding	T	T	F	F	T	F	F	T	T
10	21832584	21864021	12.54	2.37	5.18	0	0	0	SLC7A7	ENSBTAG00000014821	1	46.89	protein_coding	T	T	F	F	F	F	T	T	F
10	30077158	30135194	23.76	3.21	9.26	0	0	0	SCG5	ENSBTAG00000032613	-1	43.1	protein_coding	T	F	F	F	T	F	T	T	T
10	37035180	37043518	0.65	3.28	9.73	2.28e-07	9.62e-07	0.00455	ITPKA	ENSBTAG00000001675	1	57.57	protein_coding	T	F	F	F	F	F	F	T	F
10	43495561	43569743	6.17	2.57	5.92	0	0	0	ATL1	ENSBTAG00000014312	1	36.79	protein_coding	T	F	F	F	F	F	T	T	F
10	46006654	46130505	1.18	2.79	6.9	1.43e-07	6.14e-07	0.00286	DAPK2	ENSBTAG00000011820	1	46.63	protein_coding	T	T	T	F	F	F	T	T	T
10	47303876	47796327	2.14	3.19	9.11	0	0	0	TLN2	ENSBTAG00000003667	-1	43.89	protein_coding	T	F	F	F	T	F	T	T	T
10	4872818	4904741	4.08	2.52	5.73	3.02e-14	2.11e-13	6.03e-10	C10H11ORF46	ENSBTAG00000039618	1	44.72	protein_coding	F	F	F	F	F	F	T	F	F
10	52673546	52771273	0.78	3.8	13.96	2.34e-07	9.86e-07	0.00467	gene:ENSBTAG00000002194	ENSBTAG00000002194	-1	42.07	protein_coding	F	T	F	F	T	F	T	T	T
10	52835256	52941952	2.14	2.79	6.9	0	0	0	CGNL1	ENSBTAG00000008575	-1	44.34	protein_coding	F	F	F	F	F	F	T	T	T
10	58662512	58711813	2.39	6.37	82.68	0	0	0	TMOD2	ENSBTAG00000014011	-1	41.68	protein_coding	F	F	F	F	F	F	T	T	T
10	65325342	65341352	31.32	2.07	4.21	0	0	0	GATM	ENSBTAG00000005586	1	39.89	protein_coding	T	T	F	F	F	F	T	T	T
10	70578795	70720977	12.31	3.57	11.88	0	0	0	C10H14orf37	ENSBTAG00000020880	-1	40.71	protein_coding	T	F	F	F	F	F	T	F	F
10	76999737	77022382	3.53	2.52	5.72	2.77e-11	1.58e-10	5.53e-07	PPP1R36	ENSBTAG00000007809	1	39.7	protein_coding	T	F	T	F	T	F	T	T	T
10	79690916	79713922	1.28	3.83	14.18	0	0	0	TMEM229B	ENSBTAG00000012900	-1	51.48	protein_coding	T	F	F	F	F	F	T	T	T
10	85097754	85123914	3.14	7.55	187.54	0	0	0	PAPLN	ENSBTAG00000011680	1	56.62	protein_coding	F	T	F	F	T	F	T	T	T
10	86595706	86608816	1.22	5.32	39.9	4e-12	2.43e-11	7.99e-08	PGF	ENSBTAG00000013688	-1	56.14	protein_coding	T	T	F	F	F	F	F	F	F
10	89488356	89523829	0.57	7.6	193.62	4.22e-12	2.56e-11	8.44e-08	TMEM63C	ENSBTAG00000016283	1	52.59	protein_coding	F	F	F	F	F	F	F	F	F
11	10071901	10089833	6.38	2.61	6.09	0	0	0	LOXL3	ENSBTAG00000018578	1	48.73	protein_coding	F	T	F	F	T	F	T	F	F
11	100791339	100843336	111.69	2.47	5.55	0	0	0	ASS1	ENSBTAG00000020747	1	55.89	protein_coding	T	F	F	T	T	F	F	T	T
11	101247082	101315225	0.12	6.39	83.76	1.71e-06	6.66e-06	0.03	LAMC3	ENSBTAG00000017473	1	54	protein_coding	F	F	F	F	F	F	F	T	F
11	10196559	10203502	0.33	6.55	93.91	1.52e-06	5.95e-06	0.03	MGC152281	ENSBTAG00000037856	1	45.56	protein_coding	T	F	F	F	F	F	F	T	F
11	103392739	103438416	2.37	2.71	6.54	0	0	0	KCNT1	ENSBTAG00000018975	1	59.52	protein_coding	T	F	F	F	F	F	F	F	F
11	104130864	104131233	17.25	4.39	20.89	0	0	0	gene:ENSBTAG00000030278	ENSBTAG00000030278	1	69.02	protein_coding	T	F	F	F	F	F	F	F	F
11	105922299	105945800	0.67	2.24	4.73	1.98e-06	7.67e-06	0.04	GRIN1	ENSBTAG00000047202	-1	64.58	protein_coding	T	F	F	F	F	F	T	F	T
11	106183598	106189094	22.81	3	8	0	0	0	ENTPD2	ENSBTAG00000048125	1	65.58	protein_coding	T	T	F	F	T	F	F	F	F
11	106209227	106222883	3.44	3.56	11.83	0	0	0	ABCA2	ENSBTAG00000047254	1	67.28	protein_coding	T	T	F	F	T	F	F	F	F
11	106247577	106250629	14.45	6.15	70.79	0	0	0	PTGDS	ENSBTAG00000015074	-1	69.51	protein_coding	T	T	F	F	T	F	F	F	F
11	107148108	107149594	3.28	5.72	52.84	7.3e-09	3.5e-08	0.000146	SCGB1C1	ENSBTAG00000022142	1	59.52	protein_coding	F	F	F	F	T	F	T	T	T
11	25187252	25201563	1.01	7.51	182.09	1.1e-12	6.93e-12	2.19e-08	HAAO	ENSBTAG00000004674	-1	53.51	protein_coding	T	F	F	F	F	F	T	F	T
11	28576347	28668899	0.65	2.54	5.81	2e-09	1e-08	3.99e-05	EPAS1	ENSBTAG00000003711	1	47.49	protein_coding	F	T	T	F	T	F	T	F	T
11	29626087	29636759	3.82	2.54	5.81	0	0	0	EPCAM	ENSBTAG00000006474	1	38.69	protein_coding	T	T	F	F	F	F	T	T	T
11	29759820	29808312	2.29	2.19	4.57	1.57e-08	7.3e-08	0.000313	KCNK12	ENSBTAG00000017500	-1	48.45	protein_coding	F	F	F	F	F	F	T	T	F
11	3016325	3056118	0.76	6.05	66.46	0	0	0	ZAP70	ENSBTAG00000005892	1	49.67	protein_coding	F	F	T	F	F	F	T	F	F
11	3366420	3528949	0.41	3.79	13.81	1.4e-08	6.54e-08	0.00028	VWA3B	ENSBTAG00000034384	1	41.95	protein_coding	T	F	F	F	F	F	T	T	T
11	46785772	46812769	4.96	2.25	4.75	1.11e-16	8.86e-16	2.22e-12	PAX8	ENSBTAG00000019354	-1	51.04	protein_coding	F	F	F	F	F	F	T	T	T
11	47915426	47935161	0.85	4.72	26.43	9.78e-09	4.64e-08	0.000195	CD8B	ENSBTAG00000008956	1	48.02	protein_coding	F	F	F	F	F	F	F	F	F
11	49390250	49396081	0.57	6.84	114.87	7.62e-08	3.34e-07	0.00152	gene:ENSBTAG00000020828	ENSBTAG00000020828	-1	59.14	protein_coding	T	T	F	F	T	F	F	F	F
11	54723190	55906462	2.84	2.56	5.88	4.24e-14	2.94e-13	8.47e-10	CTNNA2	ENSBTAG00000031669	-1	39.9	protein_coding	F	F	F	F	T	F	T	T	T
11	54764951	55025216	1.2	4.32	20.01	1.34e-08	6.3e-08	0.000269	gene:ENSBTAG00000047167	ENSBTAG00000047167	-1	39.84	protein_coding	F	F	F	F	F	F	T	T	T
11	68678749	68715047	12.13	2.27	4.83	0	0	0	CAPN14	ENSBTAG00000015865	1	47.06	protein_coding	F	F	F	F	F	F	T	T	T
11	72364682	72373190	1.79	6.3	78.83	0	0	0	SLC30A3	ENSBTAG00000011381	1	56.42	protein_coding	F	F	F	F	F	F	T	T	F
11	72671399	72760767	1.02	5.57	47.61	0	0	0	DPYSL5	ENSBTAG00000018576	-1	45.64	protein_coding	T	F	F	T	F	F	T	F	F
11	78889151	78907349	1.69	8.44	347.73	0	0	0	MATN3	ENSBTAG00000020893	1	43.51	protein_coding	T	F	F	F	F	F	T	T	T
11	80842561	80844195	1.59	3.12	8.67	8.69e-08	3.79e-07	0.00174	KCNS3	ENSBTAG00000019212	-1	54.8	protein_coding	F	F	F	F	F	F	F	F	F
11	81977713	82033357	1.07	7.4	169.29	1.16e-11	6.78e-11	2.31e-07	FAM49A	ENSBTAG00000012779	1	44.4	protein_coding	F	F	F	F	T	F	T	T	T
11	86858116	86918106	2.4	2.47	5.55	4.7e-10	2.47e-09	9.38e-06	ATP6V1C2	ENSBTAG00000001927	-1	48.71	protein_coding	T	F	F	F	F	F	T	T	T
11	88390471	88444776	3.63	2.82	7.05	0	0	0	MBOAT2	ENSBTAG00000008160	1	43.51	protein_coding	F	F	F	F	F	F	F	F	F
11	93219287	93245045	156.85	3.01	8.07	0	0	0	PTGS1	ENSBTAG00000006716	1	50.53	protein_coding	T	T	F	F	T	F	T	T	F
11	98435180	98467957	1.27	9.12	557.67	0	0	0	SH2D3C	ENSBTAG00000015375	-1	53.81	protein_coding	F	T	F	F	F	F	T	T	T
11	98509474	98513781	11.08	3.68	12.82	0	0	0	gene:ENSBTAG00000046303	ENSBTAG00000046303	1	57.4	protein_coding	F	T	F	F	F	F	F	T	T
11	98517162	98541363	4.56	3.39	10.48	0	0	0	gene:ENSBTAG00000008997	ENSBTAG00000008997	-1	53.75	protein_coding	F	T	F	F	F	F	F	T	T
11	98601203	98609975	4.57	3.36	10.28	0	0	0	PIP5KL1	ENSBTAG00000003387	-1	55.94	protein_coding	T	T	F	F	F	F	F	T	F
11	98834514	98877986	4.14	8.2	293.94	0	0	0	DNM1	ENSBTAG00000011307	1	55.16	protein_coding	T	T	T	F	T	F	F	T	F
11	99019928	99029485	36.6	2.05	4.14	0	0	0	CERCAM	ENSBTAG00000038139	1	57.53	protein_coding	T	F	F	F	F	F	T	T	F
12	36310779	36318420	145.27	3.59	12.06	0	0	0	GJB6	ENSBTAG00000038662	1	49.88	protein_coding	F	F	F	F	F	F	T	T	F
12	36901244	36922492	0.61	5.57	47.53	1.11e-16	8.86e-16	2.22e-12	ATP12A	ENSBTAG00000014486	-1	49.66	protein_coding	F	F	F	F	F	F	F	F	F
12	90438591	90504948	2.8	3.38	10.44	0	0	0	MCF2L	ENSBTAG00000017289	1	64.89	protein_coding	T	T	F	F	F	F	F	F	F
13	16278275	16404464	1.93	2.93	7.64	0	0	0	ITIH5	ENSBTAG00000013004	1	45.07	protein_coding	T	T	F	F	T	F	T	T	T
13	26772494	26932201	0.47	3.06	8.35	1.88e-08	8.68e-08	0.000376	MYO3A	ENSBTAG00000002123	1	39.08	protein_coding	F	F	F	F	F	F	F	F	T
13	29940129	29943624	5.85	2.94	7.67	0	0	0	ACBD7	ENSBTAG00000002858	-1	38.67	protein_coding	F	F	F	F	F	F	T	T	T
13	3147664	3170170	0.45	7.19	145.89	5.25e-10	2.75e-09	1.05e-05	ANKEF1	ENSBTAG00000019726	1	38.41	protein_coding	T	F	F	F	F	F	F	F	F
13	31559727	31826838	0.63	2.95	7.74	0	0	0	CUBN	ENSBTAG00000005072	-1	40.6	protein_coding	F	T	F	F	T	F	T	T	T
13	40323236	40535389	0.65	2.05	4.13	3.61e-08	1.62e-07	0.000721	RALGAPA2	ENSBTAG00000014178	-1	44.54	protein_coding	F	T	F	F	T	F	T	T	T
13	43029813	43073610	1.6	2.39	5.26	8.54e-11	4.71e-10	1.71e-06	ACSS1	ENSBTAG00000004281	-1	53.53	protein_coding	T	F	F	F	F	F	T	T	F
13	47444352	47449390	1.98	3.71	13.13	0	0	0	PRND	ENSBTAG00000011010	1	41.66	protein_coding	F	F	F	F	F	F	T	T	T
13	52437394	52447854	6.38	5.2	36.64	0	0	0	SLC4A11	ENSBTAG00000027409	1	58.39	protein_coding	T	F	F	F	F	F	T	T	F
13	54276808	54284473	9.89	2.39	5.24	0	0	0	TCEA2	ENSBTAG00000021836	-1	61.66	protein_coding	T	F	F	F	F	F	F	F	F
13	54526443	54527951	316.89	2.42	5.35	0	0	0	TNFRSF6B	ENSBTAG00000027407	-1	68.85	protein_coding	F	T	F	F	F	F	F	T	F
13	54550376	54560121	1.82	4.82	28.23	0	0	0	STMN3	ENSBTAG00000038974	1	59.22	protein_coding	T	T	F	F	F	F	F	F	F
13	54623917	54631595	21.24	8.83	454.14	0	0	0	EEF1A2	ENSBTAG00000021685	1	62.39	protein_coding	T	F	F	F	T	F	F	F	F
13	54658797	54685973	0.26	6.51	91.21	1.8e-06	6.99e-06	0.04	KCNQ2	ENSBTAG00000003030	1	61.48	protein_coding	F	F	F	F	F	F	F	F	F
13	55519323	55521407	0.56	6.43	86.36	1.46e-06	5.72e-06	0.03	HRH3	ENSBTAG00000031625	1	63.21	protein_coding	T	F	T	F	F	F	F	T	T
13	55672235	55803649	0.31	6.84	114.73	1.1e-06	4.38e-06	0.02	CDH4	ENSBTAG00000015058	-1	52.26	protein_coding	F	F	F	F	F	F	F	T	F
13	61176218	61187210	27.17	2.28	4.85	0	0	0	TRIB3	ENSBTAG00000017007	-1	51.43	protein_coding	F	F	F	F	F	F	T	T	F
13	61211662	61218035	0.98	2.95	7.72	1.24e-09	6.31e-09	2.47e-05	NRSN2	ENSBTAG00000027387	-1	54.71	protein_coding	T	T	F	F	F	F	F	F	F
13	61265883	61285459	7.96	3.51	11.36	0	0	0	C20orf96	ENSBTAG00000002115	1	45.59	protein_coding	T	F	F	F	F	F	T	T	T
13	63684235	63703230	5.57	4.47	22.18	0	0	0	NECAB3	ENSBTAG00000003946	-1	58.43	protein_coding	F	F	F	F	T	F	F	T	F
13	64737634	64791116	16.56	5.26	38.4	0	0	0	GGT7	ENSBTAG00000013301	-1	44.07	protein_coding	T	T	F	F	T	F	T	T	T
13	64888626	64912758	0.57	2.76	6.78	7.86e-10	4.07e-09	1.57e-05	MYH7B	ENSBTAG00000003512	1	57.73	protein_coding	F	F	F	F	F	F	T	T	T
13	65499318	65504023	2.21	2.09	4.26	1.65e-08	7.67e-08	0.00033	SPAG4	ENSBTAG00000006949	1	58.18	protein_coding	F	F	F	F	F	F	T	T	T
13	67663138	67697607	78.15	2.88	7.36	0	0	0	TGM2	ENSBTAG00000016208	-1	52.09	protein_coding	F	T	F	T	T	F	T	T	F
13	68258627	68366080	0.5	2.56	5.91	6.56e-11	3.65e-10	1.31e-06	PPP1R16B	ENSBTAG00000000653	1	47.84	protein_coding	T	F	F	F	F	F	T	T	F
13	73866814	73872277	3.9	3.86	14.48	0	0	0	KCNK15	ENSBTAG00000003380	1	54.61	protein_coding	F	F	F	F	F	F	F	F	F
13	78319020	78368752	3.39	5	32	0	0	0	PTGIS	ENSBTAG00000017537	-1	49.47	protein_coding	F	F	F	F	F	F	T	T	F
13	82162091	82259990	0.38	4.63	24.82	2.82e-08	1.28e-07	0.000564	BCAS1	ENSBTAG00000000835	-1	46.72	protein_coding	F	T	F	F	F	F	T	T	T
14	21456452	21464699	2.05	4.26	19.21	1.29e-09	6.59e-09	2.58e-05	EFCAB1	ENSBTAG00000008693	-1	44.02	protein_coding	F	T	F	F	T	F	F	F	F
14	2327870	2331019	57	3.57	11.85	0	0	0	NAPRT	ENSBTAG00000014642	1	67.17	protein_coding	T	F	F	F	F	F	F	F	T
14	2462544	2471434	7.44	2.89	7.39	0	0	0	RHPN1	ENSBTAG00000002104	-1	65.89	protein_coding	T	F	F	F	F	F	F	F	F
14	2624758	2628462	32.01	3.62	12.28	0	0	0	LY6E	ENSBTAG00000017040	-1	62.86	protein_coding	F	F	F	F	F	F	F	F	T
14	2814587	2816685	8.28	2.83	7.12	1.38e-12	8.68e-12	2.76e-08	LYNX1	ENSBTAG00000005762	1	64.32	protein_coding	T	T	F	F	T	F	F	F	F
14	2892788	2893978	0.87	4.54	23.26	2.46e-07	1.04e-06	0.00492	ARC	ENSBTAG00000021639	1	67.09	protein_coding	T	T	F	F	F	F	F	F	F
14	32760708	32786980	1.01	2.32	4.99	6.88e-10	3.57e-09	1.37e-05	C14H8orf46	ENSBTAG00000002192	1	45.78	protein_coding	F	F	F	F	F	F	T	T	T
14	3639632	3640717	1.34	3.86	14.5	8.38e-07	3.37e-06	0.02	GPR20	ENSBTAG00000015985	1	69.71	protein_coding	T	F	F	F	F	F	F	F	F
14	43880469	43978277	5.02	2.48	5.57	0	0	0	PKIA	ENSBTAG00000008150	1	37.11	protein_coding	T	T	F	F	T	F	T	T	T
14	50844179	51066191	0.46	2.19	4.57	1.43e-07	6.15e-07	0.00286	TRPS1	ENSBTAG00000017694	1	37.03	protein_coding	F	T	F	F	T	F	T	T	T
14	72437129	72525873	35.26	2.74	6.7	0	0	0	CDH17	ENSBTAG00000021964	1	42.44	protein_coding	F	F	F	F	F	F	T	T	T
14	75397723	75546727	2.03	2.36	5.13	9.92e-11	5.45e-10	1.98e-06	SLC26A7	ENSBTAG00000032301	-1	39.25	protein_coding	F	F	F	F	F	F	T	T	T
14	76757695	77111545	1.03	2.71	6.54	5.86e-11	3.27e-10	1.17e-06	MMP16	ENSBTAG00000006877	1	38.36	protein_coding	T	F	F	F	F	F	T	T	T
14	79694162	79733755	28.34	2.89	7.4	0	0	0	CA13	ENSBTAG00000001000	-1	42.1	protein_coding	T	F	F	F	T	F	T	F	T
15	22174763	22198030	1.64	8.17	288.19	0	0	0	LAYN	ENSBTAG00000017901	1	45.95	protein_coding	F	F	F	F	F	F	F	F	T
15	22566929	22570256	224.89	3.08	8.46	0	0	0	CRYAB	ENSBTAG00000000434	-1	46.72	protein_coding	T	F	F	F	F	F	T	T	T
15	29456451	29460605	1.49	4.74	26.71	1.11e-15	8.43e-15	2.22e-11	CD3D	ENSBTAG00000006452	-1	49.12	protein_coding	F	T	F	F	F	F	T	T	T
15	29462576	29469747	15.95	4.55	23.45	0	0	0	CD3G	ENSBTAG00000006453	1	42.62	protein_coding	F	T	F	F	F	F	T	T	T
15	30257754	30272204	0.43	7.78	219.14	1.75e-11	1.01e-10	3.5e-07	ABCG4	ENSBTAG00000011800	1	53.39	protein_coding	T	F	F	F	T	F	T	T	F
15	30464926	30487308	1.8	2.31	4.95	6.57e-11	3.65e-10	1.31e-06	USP2	ENSBTAG00000009749	-1	55.37	protein_coding	T	F	F	F	T	F	T	T	T
15	30509504	30515399	80.76	2.13	4.39	0	0	0	THY1	ENSBTAG00000019627	-1	56.41	protein_coding	T	T	F	F	F	F	T	T	F
15	35409567	35496594	0.28	4.37	20.7	2.55e-15	1.9e-14	5.1e-11	OTOG	ENSBTAG00000000987	-1	50.72	protein_coding	T	F	F	F	F	F	F	F	F
15	35500365	35548981	3.45	2.88	7.38	0	0	0	USH1C	ENSBTAG00000000986	1	52.28	protein_coding	T	F	F	F	F	F	F	F	F
15	41624351	41980708	0.83	3.03	8.16	3.38e-08	1.53e-07	0.000676	GALNT18	ENSBTAG00000002914	1	47.46	protein_coding	T	T	T	F	T	F	T	T	T
15	44250291	44260216	3.86	3.98	15.82	0	0	0	C11orf16	ENSBTAG00000001917	1	51.68	protein_coding	F	F	F	F	F	F	T	T	T
15	4501435	4788300	0.9	2.68	6.4	1.94e-08	8.95e-08	0.000388	PDGFD	ENSBTAG00000034827	1	39.29	protein_coding	F	F	F	F	F	F	F	T	T
15	47109758	47267567	7.63	3.22	9.32	0	0	0	APBB1	ENSBTAG00000015655	1	48.64	protein_coding	T	T	F	F	F	F	T	T	T
15	52913333	52984107	1.25	4.46	22.06	0	0	0	PDE2A	ENSBTAG00000008419	-1	55.01	protein_coding	F	F	F	F	F	F	T	T	F
15	53087563	53115417	14.87	2.68	6.39	0	0	0	STARD10	ENSBTAG00000015182	-1	53.93	protein_coding	T	T	T	T	T	F	T	T	F
15	53907206	53922643	6.54	2.21	4.64	0	0	0	PLEKHB1	ENSBTAG00000009830	1	51.58	protein_coding	F	F	F	F	F	F	T	T	T
15	54418559	54459500	3.59	3.45	10.94	0	0	0	P4HA3	ENSBTAG00000006579	-1	42.85	protein_coding	T	F	F	F	F	F	T	T	T
15	55940757	55973229	2.75	3.17	8.97	0	0	0	DGAT2	ENSBTAG00000001154	1	52.56	protein_coding	T	T	F	F	F	F	T	T	T
15	57256223	57313832	16.26	3.71	13.11	0	0	0	CAPN5	ENSBTAG00000005034	1	55.4	protein_coding	T	F	F	T	T	F	F	T	F
15	58477427	58481142	3.94	2.33	5.01	0	0	0	FIBIN	ENSBTAG00000006676	1	45.61	protein_coding	T	F	F	F	F	F	F	F	F
15	5912037	5922736	44.42	2.57	5.95	0	0	0	MMP13	ENSBTAG00000015059	1	36.89	protein_coding	F	F	F	F	F	F	T	T	T
15	66754734	66832246	24.67	3.71	13.12	0	0	0	PAMR1	ENSBTAG00000012630	-1	44.62	protein_coding	T	F	F	F	F	F	T	T	T
15	76573748	76577430	3.15	2.48	5.59	1.51e-12	9.45e-12	3.02e-08	CHST1	ENSBTAG00000003721	-1	60.71	protein_coding	T	F	F	F	F	F	F	F	F
15	76794436	76813776	28.59	3	7.99	0	0	0	MAPK8IP1	ENSBTAG00000000317	1	62.23	protein_coding	T	F	F	T	T	F	F	F	T
15	77251939	77254055	3.58	5.27	38.56	0	0	0	CHRM4	ENSBTAG00000033699	-1	61.45	protein_coding	T	F	F	F	F	F	F	T	F
15	81828654	81860220	1.41	3.3	9.82	3.52e-11	1.99e-10	7.02e-07	P2RX3	ENSBTAG00000000376	1	57.58	protein_coding	T	T	F	F	T	F	T	F	F
15	81978440	81996848	2.15	4.8	27.92	0	0	0	SLC43A3	ENSBTAG00000010060	-1	54.23	protein_coding	T	F	F	F	F	F	F	F	F
15	82033375	82042917	2.92	4.37	20.63	0	0	0	RTN4RL2	ENSBTAG00000012621	1	58.95	protein_coding	T	T	F	F	F	F	T	F	T
15	82159474	82172143	11.52	3.62	12.34	0	0	0	SERPING1	ENSBTAG00000016267	1	50.78	protein_coding	T	F	F	F	F	F	T	F	F
16	1734650	1749646	7.18	3.62	12.33	0	0	0	ETNK2	ENSBTAG00000018509	-1	56.14	protein_coding	F	F	F	F	F	F	F	F	F
16	2557488	2629557	0.28	4.77	27.37	7.33e-09	3.51e-08	0.000147	NFASC	ENSBTAG00000045895	1	55.53	protein_coding	F	F	F	F	F	F	F	F	F
16	2654177	2683555	2.82	10.37	1325.75	0	0	0	CNTN2	ENSBTAG00000014645	1	57.99	protein_coding	T	F	F	F	F	F	F	F	F
16	29585792	29624037	57.29	2.62	6.15	0	0	0	EPHX1	ENSBTAG00000000140	1	49.19	protein_coding	T	F	T	F	T	F	T	F	T
16	3168635	3193846	3.06	2.78	6.85	0	0	0	MFSD4A	ENSBTAG00000004952	1	55.87	protein_coding	T	F	F	F	F	F	T	T	T
16	42901488	42905541	18.07	3.87	14.58	0	0	0	FBXO44	ENSBTAG00000032617	-1	53.58	protein_coding	T	F	F	F	F	F	T	T	F
16	42906700	42912737	14.33	4.04	16.46	0	0	0	FBXO2	ENSBTAG00000007223	1	58.55	protein_coding	T	F	F	F	F	F	T	F	T
16	43786499	43839928	0.42	2.34	5.07	1.54e-06	6.02e-06	0.03	CASZ1	ENSBTAG00000019818	1	58.55	protein_coding	F	T	F	F	T	F	F	F	F
16	44674362	44688066	2.55	3.44	10.87	0	0	0	PIK3CD	ENSBTAG00000018984	-1	58.52	protein_coding	F	F	F	F	F	F	F	T	F
16	45886757	45908565	0.75	8.02	259.69	2.37e-12	1.46e-11	4.73e-08	SLC45A1	ENSBTAG00000001401	-1	51.07	protein_coding	F	F	F	F	T	F	F	T	F
16	46288366	46306428	12.84	2.63	6.21	0	0	0	TNFRSF9	ENSBTAG00000003313	1	38.55	protein_coding	T	F	F	F	F	F	T	F	T
16	4686518	4697039	6.78	2.22	4.65	0	0	0	SARG	ENSBTAG00000018143	-1	48.9	protein_coding	F	T	F	F	T	F	T	T	T
16	50553087	50556851	68.36	3.09	8.52	0	0	0	SMIM1	ENSBTAG00000045754	-1	59.36	protein_coding	T	F	F	F	F	F	F	T	F
16	50811142	50834864	2.42	4.15	17.71	0	0	0	ARHGEF16	ENSBTAG00000020837	-1	62.91	protein_coding	T	F	F	F	F	F	F	F	F
16	52370233	52373541	1.53	3.08	8.48	2.63e-11	1.5e-10	5.26e-07	TMEM88B	ENSBTAG00000023784	-1	57.57	protein_coding	T	T	T	F	T	F	T	T	T
16	52492065	52494746	7.15	9.44	692.74	0	0	0	TNFRSF18	ENSBTAG00000015632	1	63.2	protein_coding	T	F	F	F	F	F	F	F	F
16	52595746	52599094	1.17	4.3	19.63	4.97e-12	3e-11	9.92e-08	SCNN1D	ENSBTAG00000017674	1	65.21	protein_coding	F	T	T	F	F	F	F	T	T
16	52660395	52665705	2.34	7.12	138.62	0	0	0	gene:ENSBTAG00000024492	ENSBTAG00000024492	-1	61.53	protein_coding	T	F	F	F	F	F	F	F	F
16	52714627	52715665	13.92	3.46	10.99	0	0	0	ISG15	ENSBTAG00000014707	-1	59.48	protein_coding	T	T	F	F	F	F	T	T	T
16	53295217	53302109	1.56	7.61	195.04	2.75e-13	1.8e-12	5.5e-09	CTRC	ENSBTAG00000024497	-1	52.55	protein_coding	F	T	F	F	T	F	F	T	F
16	65778442	65940677	9.19	3.03	8.15	0	0	0	NMNAT2	ENSBTAG00000000795	-1	45.56	protein_coding	F	T	F	F	T	F	T	T	T
16	66081122	66128113	0.23	7.08	135.54	2.47e-09	1.23e-08	4.93e-05	NCF2	ENSBTAG00000008004	-1	48.26	protein_coding	F	F	F	F	F	F	T	T	F
16	66960790	67142414	5.17	2.16	4.46	0	0	0	C16H1ORF21	ENSBTAG00000038079	1	41.81	protein_coding	F	T	F	F	F	F	T	T	F
16	67318525	67499532	0.46	4.94	30.64	1.57e-10	8.52e-10	3.13e-06	FAM129A	ENSBTAG00000014548	-1	40.77	protein_coding	F	F	F	F	F	F	T	T	T
16	68192901	68733392	0.06	4.62	24.56	5.5e-08	2.44e-07	0.0011	HMCN1	ENSBTAG00000015235	1	37.99	protein_coding	T	F	F	F	F	F	F	T	F
16	70826736	70830809	21.25	5.27	38.53	0	0	0	ELF3	ENSBTAG00000008756	1	64.97	protein_coding	F	T	F	F	F	F	F	T	T
16	70932238	71016271	4.62	4.46	22.06	0	0	0	LGR6	ENSBTAG00000004789	1	61.94	protein_coding	T	T	F	F	F	F	F	T	F
16	718146	759737	1.03	2.98	7.87	1.55e-08	7.2e-08	0.000309	ADORA1	ENSBTAG00000011461	1	48.46	protein_coding	F	F	F	F	F	F	T	T	F
16	75463612	75508770	23.03	2.01	4.02	0	0	0	HSD11B1	ENSBTAG00000015086	-1	41.94	protein_coding	F	F	T	F	F	F	T	T	F
16	81471758	81527931	0.56	4.01	16.17	1.04e-14	7.51e-14	2.09e-10	CACNA1S	ENSBTAG00000047491	-1	61.84	protein_coding	T	F	F	F	F	F	F	T	T
16	81683387	81720203	5.1	2.4	5.29	0	0	0	PKP1	ENSBTAG00000046350	1	62.83	protein_coding	T	T	F	T	T	F	F	F	F
17	17575019	17620096	1.41	3.64	12.48	0	0	0	CLGN	ENSBTAG00000001580	1	37.51	protein_coding	F	F	F	F	F	F	T	T	T
17	18709903	18721278	2.29	8.6	386.77	0	0	0	MGARP	ENSBTAG00000002599	1	38.75	protein_coding	T	F	F	F	F	F	T	T	T
17	42999060	43205751	5.91	2.94	7.7	0	0	0	GLRB	ENSBTAG00000021764	-1	39.07	protein_coding	T	T	F	F	F	F	T	T	T
17	46236043	46260184	3.37	5.15	35.43	0	0	0	MMP17	ENSBTAG00000002145	-1	56.31	protein_coding	T	F	F	F	F	F	T	F	F
17	47028031	47202358	0.18	6.97	125.16	1.13e-08	5.31e-08	0.000225	ADGRD1	ENSBTAG00000013848	-1	48.38	protein_coding	F	F	F	F	F	F	F	F	F
17	49445324	49739129	0.65	8.22	299.04	0	0	0	TMEM132C	ENSBTAG00000046256	-1	44.13	protein_coding	F	F	F	F	F	F	F	F	T
17	546398	697915	10.27	3.01	8.05	0	0	0	CPE	ENSBTAG00000016514	1	38.93	protein_coding	T	F	F	F	F	F	F	F	F
17	54827286	54851000	5.31	2.43	5.41	0	0	0	ABCB9	ENSBTAG00000008464	1	52.25	protein_coding	F	T	F	F	T	F	T	T	F
17	55418582	55419667	0.95	7.17	143.92	1.07e-08	5.08e-08	0.000214	B3GNT4	ENSBTAG00000004197	-1	62.15	protein_coding	F	T	F	F	F	F	F	T	T
17	60296575	60331722	3.61	3.35	10.19	5.9e-09	2.86e-08	0.000118	TESC	ENSBTAG00000044078	1	53.58	protein_coding	F	F	F	F	F	F	T	F	F
17	63302947	63311098	8.06	6.69	102.96	0	0	0	SDS	ENSBTAG00000031814	1	52.45	protein_coding	T	F	F	F	F	F	T	T	F
17	63397791	63429841	2.76	5.4	42.15	0	0	0	RASAL1	ENSBTAG00000016739	-1	52.38	protein_coding	T	F	F	F	F	F	T	T	T
17	66586628	66593115	9.44	4.29	19.56	0	0	0	TMEM119	ENSBTAG00000031849	1	57.78	protein_coding	F	T	F	F	T	F	T	F	F
17	68354300	68362110	5.29	2.21	4.62	0	0	0	ASPHD2	ENSBTAG00000037832	1	58.14	protein_coding	T	F	F	F	F	F	F	T	F
17	68506967	68519007	10.23	2.41	5.3	0	0	0	CRYBB1	ENSBTAG00000019280	-1	52.75	protein_coding	F	F	F	F	F	F	F	F	T
17	70643238	70683856	1.1	2.15	4.43	1.79e-06	6.96e-06	0.04	EMID1	ENSBTAG00000017738	1	55.57	protein_coding	F	T	F	F	T	F	T	T	T
17	70821078	70828226	9.16	2.04	4.11	0	0	0	NEFH	ENSBTAG00000013147	1	55.74	protein_coding	T	F	F	F	F	F	F	T	F
17	71606712	71619967	0.68	6.73	106.06	7.85e-07	3.16e-06	0.02	SEC14L4	ENSBTAG00000031351	-1	52.56	protein_coding	T	F	F	F	F	F	F	F	F
17	71771703	71894872	0.53	2.65	6.27	3.48e-07	1.44e-06	0.00696	OSBP2	ENSBTAG00000019146	1	53.4	protein_coding	F	T	F	F	T	F	T	F	F
17	73251706	73266818	4.61	4.27	19.31	0	0	0	SLC2A11	ENSBTAG00000018647	1	60.53	protein_coding	T	T	F	F	F	F	F	F	F
17	73309907	73315353	15.3	4.9	29.76	0	0	0	GSTT3	ENSBTAG00000008587	1	59.39	protein_coding	T	F	F	F	F	F	F	T	T
17	73408384	73415618	8.24	8.24	302.24	0	0	0	SUSD2	ENSBTAG00000006730	1	67.42	protein_coding	T	T	F	F	F	F	F	F	F
17	73425746	73434932	2.77	2.77	6.8	3.33e-16	2.6e-15	6.66e-12	GGT5	ENSBTAG00000006608	-1	66.32	protein_coding	T	T	F	F	T	F	F	F	T
17	73437809	73452741	4.1	8.23	300.12	0	0	0	GGT1	ENSBTAG00000046900	-1	64.9	protein_coding	T	F	F	F	T	F	F	F	T
17	73576018	73589968	4.51	5.41	42.43	0	0	0	ADORA2A	ENSBTAG00000016944	-1	65.99	protein_coding	F	T	F	F	F	F	F	F	F
17	73799588	73847910	0.5	6.47	88.95	1.24e-06	4.91e-06	0.02	RSPH14	ENSBTAG00000036113	1	64.97	protein_coding	T	F	F	T	F	F	F	F	F
17	73812707	73828749	2.95	2.33	5.01	1.31e-07	5.66e-07	0.00263	GNAZ	ENSBTAG00000047664	-1	68.36	protein_coding	T	F	F	T	F	F	F	F	F
17	74307986	74318794	1.24	5.89	59.16	0	0	0	AIFM3	ENSBTAG00000038132	1	65.61	protein_coding	T	T	F	F	F	F	F	F	F
17	74366170	74369086	3.12	2.86	7.26	0	0	0	SLC7A4	ENSBTAG00000009145	-1	67.91	protein_coding	F	F	F	F	F	F	T	F	F
17	74439064	74456082	43.01	2.94	7.66	0	0	0	gene:ENSBTAG00000047676	ENSBTAG00000047676	-1	62.17	protein_coding	T	F	F	F	T	F	F	T	F
17	75103302	75104723	5.05	3.24	9.42	0	0	0	RTN4R	ENSBTAG00000046677	-1	72.22	protein_coding	F	F	F	F	F	F	F	F	F
18	14302696	14321678	0.73	8.23	300.34	0	0	0	CDH15	ENSBTAG00000011530	1	59.84	protein_coding	T	F	F	F	F	F	F	F	F
18	14321863	14326425	1.57	2.16	4.47	5.39e-07	2.2e-06	0.01	SLC22A31	ENSBTAG00000011533	-1	62.74	protein_coding	T	F	F	F	F	F	F	F	F
18	14543443	14555499	0.7	4.28	19.44	1.1e-09	5.67e-09	2.21e-05	CPNE7	ENSBTAG00000012215	1	60.94	protein_coding	F	F	F	F	F	F	F	T	T
18	14757332	14759082	4.04	3.04	8.24	0	0	0	MC1R	ENSBTAG00000023731	1	63.16	protein_coding	F	F	F	F	F	F	T	T	F
18	1548806	1608706	1.15	2.37	5.16	5.54e-07	2.26e-06	0.01	IL34	ENSBTAG00000009357	-1	47.62	protein_coding	F	F	F	F	T	F	T	T	F
18	1870817	1875884	0.69	7.11	138.12	1.13e-09	5.8e-09	2.26e-05	gene:ENSBTAG00000004766	ENSBTAG00000004766	-1	66.38	protein_coding	F	T	F	F	F	F	T	F	F
18	19181972	19212607	0.37	3.26	9.57	2.85e-09	1.42e-08	5.69e-05	NOD2	ENSBTAG00000020936	1	49.4	protein_coding	T	F	F	T	F	F	T	T	T
18	23681599	23687572	0.59	7.6	194.42	1.72e-12	1.07e-11	3.44e-08	IRX6	ENSBTAG00000016407	1	57.35	protein_coding	F	F	F	F	F	F	F	F	F
18	2486596	2491819	1.44	8.89	475.26	0	0	0	LDHD	ENSBTAG00000006779	-1	63.23	protein_coding	F	F	F	F	F	F	F	T	F
18	25342771	25348163	1.73	4.32	20	5.3e-11	2.97e-10	1.06e-06	PLLP	ENSBTAG00000011700	-1	54.5	protein_coding	F	F	F	F	F	F	T	T	T
18	25501849	25504738	129.07	3.15	8.9	0	0	0	CCL17	ENSBTAG00000001191	1	55.4	protein_coding	F	T	F	F	F	F	T	T	T
18	26021950	26043124	5.57	2.93	7.62	0	0	0	MMP15	ENSBTAG00000012919	1	59.02	protein_coding	T	F	F	F	F	F	T	F	F
18	2866949	2870945	0.96	3	8	2.21e-06	8.51e-06	0.04	CHST6	ENSBTAG00000040000	-1	56.82	protein_coding	T	F	F	F	F	F	T	T	F
18	34795758	34810221	1.38	3.68	12.8	4.25e-13	2.75e-12	8.49e-09	CES4A	ENSBTAG00000038325	1	49.49	protein_coding	T	T	F	F	F	F	T	T	T
18	34940463	34946013	0.73	3.17	8.99	2.11e-10	1.14e-09	4.22e-06	EXOC3L1	ENSBTAG00000012035	-1	59.38	protein_coding	T	T	F	F	F	F	F	F	T
18	35019679	35028432	2.53	2.19	4.55	0	0	0	PLEKHG4	ENSBTAG00000021570	1	56.24	protein_coding	T	F	F	F	F	F	F	T	F
18	35576307	35580517	2.17	2.56	5.91	5.46e-13	3.52e-12	1.09e-08	DPEP3	ENSBTAG00000002824	-1	57.4	protein_coding	F	T	F	F	T	F	F	T	T
18	35735066	35741010	1.05	2.95	7.72	8.55e-11	4.71e-10	1.71e-06	ESRP2	ENSBTAG00000004375	-1	60.45	protein_coding	T	F	F	F	F	F	T	T	F
18	43847481	43863539	1.3	8.23	301.09	0	0	0	SLC7A10	ENSBTAG00000046544	-1	58.69	protein_coding	F	F	F	F	T	F	F	F	F
18	46040472	46049240	0.29	6.71	105.01	2.13e-06	8.2e-06	0.04	LGI4	ENSBTAG00000017814	-1	56.31	protein_coding	T	T	F	F	T	F	F	F	F
18	46053083	46057378	5.02	2.75	6.73	2.8e-10	1.5e-09	5.59e-06	FXYD1	ENSBTAG00000017816	1	58.02	protein_coding	T	T	F	F	T	F	F	F	F
18	46057592	46066618	1.61	7.19	145.88	2.26e-10	1.22e-09	4.52e-06	FXYD7	ENSBTAG00000018326	1	50.91	protein_coding	T	F	F	F	F	F	F	F	F
18	46721282	46739882	0.16	6.43	86.35	1.8e-06	6.98e-06	0.04	NPHS1	ENSBTAG00000007821	-1	49.82	protein_coding	T	F	F	F	F	F	F	F	F
18	46743916	46752315	0.34	6.7	104.29	4.8e-07	1.97e-06	0.0096	KIRREL2	ENSBTAG00000007826	1	55.17	protein_coding	T	F	F	F	F	F	F	F	F
18	46754202	46764958	40.38	2.5	5.64	0	0	0	APLP1	ENSBTAG00000001151	1	54.75	protein_coding	T	T	F	F	F	F	T	T	T
18	46994991	46996544	53.42	2.31	4.97	0	0	0	COX7A1	ENSBTAG00000014878	-1	59.65	protein_coding	F	T	F	F	T	F	T	T	T
18	48502352	48631056	0.23	2.78	6.86	3.39e-11	1.92e-10	6.77e-07	RYR1	ENSBTAG00000006999	1	50.94	protein_coding	T	T	F	F	T	F	T	T	T
18	48743599	48755715	0.51	7.29	156.22	4.72e-11	2.65e-10	9.44e-07	CAPN12	ENSBTAG00000013239	-1	58.47	protein_coding	T	T	F	F	T	F	F	F	T
18	48769012	48771241	88.3	2.96	7.77	0	0	0	gene:ENSBTAG00000046365	ENSBTAG00000046365	-1	58.21	protein_coding	T	T	F	F	F	F	F	F	F
18	48791597	48793845	45.12	2.97	7.82	0	0	0	gene:ENSBTAG00000031538	ENSBTAG00000031538	1	58.2	protein_coding	T	T	F	T	T	F	F	F	F
18	49309015	49313926	2.19	7.47	176.9	6.02e-12	3.6e-11	1.2e-07	GMFG	ENSBTAG00000005390	-1	47.48	protein_coding	T	F	F	F	F	F	T	T	T
18	49888149	49890488	1.5	7.44	174.21	9.14e-12	5.42e-11	1.83e-07	TTC9B	ENSBTAG00000046666	-1	61.37	protein_coding	T	F	F	F	F	F	F	T	F
18	49995631	50005033	241.24	2.08	4.22	0	0	0	PLD3	ENSBTAG00000019150	1	56.27	protein_coding	F	F	F	T	T	F	F	T	T
18	5045212	5211278	1.63	5.61	48.98	0	0	0	VAT1L	ENSBTAG00000018146	1	47.11	protein_coding	F	F	F	F	F	F	T	T	T
18	50654851	50666554	4.13	2.28	4.87	1.11e-16	8.86e-16	2.22e-12	CYP2S1	ENSBTAG00000018240	1	52.59	protein_coding	F	T	F	F	F	F	T	T	F
18	50804598	50807705	3.94	4.99	31.72	2.92e-14	2.04e-13	5.83e-10	TMEM91	ENSBTAG00000038711	1	50.97	protein_coding	F	F	F	F	F	F	T	T	T
18	51475031	51497957	0.56	6.78	109.64	1.14e-07	4.93e-07	0.00228	POU2F2	ENSBTAG00000008556	1	54.41	protein_coding	T	T	F	T	F	F	F	F	T
18	51587793	51603479	0.2	6.43	86.35	2.06e-06	7.95e-06	0.04	ATP1A3	ENSBTAG00000018635	1	55.1	protein_coding	T	F	F	F	F	F	F	F	T
18	51991410	51995823	4.53	2.04	4.12	1.07e-13	7.2e-13	2.13e-09	LYPD3	ENSBTAG00000018077	-1	56.57	protein_coding	T	F	F	F	T	F	T	F	F
18	52178835	52183405	7.52	2.46	5.49	0	0	0	CADM4	ENSBTAG00000015984	-1	56.01	protein_coding	F	F	F	F	F	F	F	T	F
18	52660621	52675994	1.12	8.21	295.92	0	0	0	CEACAM20	ENSBTAG00000011036	-1	48.37	protein_coding	F	F	F	F	F	F	T	T	T
18	52943365	52959011	0.77	7.47	176.92	2.47e-12	1.52e-11	4.93e-08	CBLC	ENSBTAG00000009494	1	52.84	protein_coding	T	F	F	T	T	F	T	T	F
18	52965138	52976445	107.39	3.14	8.79	0	0	0	BCAM	ENSBTAG00000009495	1	59.04	protein_coding	T	T	T	F	T	F	T	T	F
18	53040105	53042792	61.96	4.59	24.15	0	0	0	APOE	ENSBTAG00000010123	1	61.83	protein_coding	T	F	F	F	T	F	T	F	F
18	53154421	53158137	1.8	2.92	7.59	8.35e-10	4.31e-09	1.67e-05	ZNF296	ENSBTAG00000013702	-1	61.47	protein_coding	T	T	F	F	F	F	F	F	F
18	53401750	53409927	2.67	3.18	9.04	0	0	0	KLC3	ENSBTAG00000002070	1	61.31	protein_coding	T	T	F	F	T	F	F	F	F
18	53615949	53617690	1.65	8.65	402.74	0	0	0	GPR4	ENSBTAG00000018398	-1	59.07	protein_coding	F	T	F	F	F	F	T	T	F
18	53668986	53677248	0.59	6.85	115.27	6.09e-07	2.47e-06	0.01	GIPR	ENSBTAG00000005527	1	53.7	protein_coding	T	T	F	F	F	F	T	T	T
18	53834507	53841046	1.5	2.94	7.68	3.9e-10	2.06e-09	7.79e-06	FOXA3	ENSBTAG00000012104	1	53.52	protein_coding	T	F	F	F	F	F	T	T	T
18	54208182	54218832	7.14	3.66	12.65	0	0	0	DACT3	ENSBTAG00000030705	-1	55.34	protein_coding	T	T	F	F	T	F	T	F	F
18	54516899	54532816	1.27	2.7	6.49	2.76e-09	1.38e-08	5.52e-05	NPAS1	ENSBTAG00000015576	1	55.17	protein_coding	T	F	F	F	F	F	T	T	T
18	54777175	54781917	5.06	5.11	34.48	0	0	0	C5AR2	ENSBTAG00000037735	1	46.53	protein_coding	T	T	F	F	T	F	F	T	F
18	55451272	55478671	2.08	3.01	8.06	0	0	0	CCDC114	ENSBTAG00000030667	-1	49.12	protein_coding	T	T	F	F	F	F	T	T	T
18	55722336	55729578	6.8	3.07	8.41	0	0	0	DBP	ENSBTAG00000006754	-1	58.07	protein_coding	T	T	F	F	F	F	T	F	T
18	55803984	55809104	1.83	2.46	5.51	2e-13	1.32e-12	3.99e-09	MAMSTR	ENSBTAG00000011617	-1	57.55	protein_coding	T	T	F	F	F	F	T	F	T
18	55828930	55832924	1.42	3	7.99	2.23e-12	1.38e-11	4.46e-08	FUT1	ENSBTAG00000023374	-1	56.12	protein_coding	T	T	F	F	F	F	T	T	F
18	55878571	55899034	1.79	3.05	8.26	5.11e-09	2.49e-08	0.000102	HSD17B14	ENSBTAG00000009174	-1	49.1	protein_coding	T	T	F	F	F	F	F	F	F
18	55930396	55938573	2.63	2.13	4.39	3.82e-12	2.33e-11	7.64e-08	TULP2	ENSBTAG00000002368	-1	52.67	protein_coding	F	T	F	F	F	F	T	T	T
18	56026310	56027284	9.45	3.39	10.45	0	0	0	LHB	ENSBTAG00000038735	-1	65.85	protein_coding	T	F	F	F	F	F	F	T	F
18	56032585	56033542	2.44	5.19	36.39	9.5e-12	5.63e-11	1.9e-07	NTF4	ENSBTAG00000047078	-1	60.33	protein_coding	T	F	F	F	F	F	F	T	F
18	56224969	56250611	1.33	2.35	5.1	1.22e-08	5.73e-08	0.000244	SLC6A16	ENSBTAG00000030543	-1	41.29	protein_coding	T	F	F	F	F	F	T	T	F
18	56343318	56354548	26.2	6.83	113.38	0	0	0	SLC17A7	ENSBTAG00000007036	-1	56.39	protein_coding	T	F	F	F	F	F	T	F	T
18	56547752	56566692	5.97	2.4	5.28	0	0	0	CPT1C	ENSBTAG00000012205	1	50.78	protein_coding	T	T	F	F	F	F	T	T	F
18	56874763	56947774	3.95	3.48	11.16	0	0	0	MYH14	ENSBTAG00000002580	1	51.69	protein_coding	T	T	F	F	F	F	T	T	T
18	57039094	57064720	0.21	6.67	101.92	4.62e-07	1.9e-06	0.00923	MYBPC2	ENSBTAG00000020080	1	54.31	protein_coding	T	F	F	F	F	F	F	F	F
18	57066061	57071540	4.75	3.55	11.74	1.44e-15	1.09e-14	2.88e-11	FAM71E1	ENSBTAG00000020082	-1	54.03	protein_coding	T	F	F	F	F	F	F	F	F
18	57171631	57183964	0.63	3.57	11.88	9.77e-09	4.64e-08	0.000195	SYT3	ENSBTAG00000013105	-1	54.85	protein_coding	T	F	F	F	F	F	T	F	F
18	57360332	57364101	3.5	8.67	407.01	0	0	0	KLK4	ENSBTAG00000020415	-1	56.26	protein_coding	T	T	F	F	F	F	T	F	F
18	62028038	62047353	0.63	8.05	264.91	0	0	0	PRKCG	ENSBTAG00000013550	1	54.13	protein_coding	T	F	F	F	F	F	F	T	T
18	62555138	62556184	2.57	2.83	7.13	1.64e-06	6.41e-06	0.03	TMEM190	ENSBTAG00000021057	-1	69.25	protein_coding	T	T	F	F	T	F	F	T	T
18	62573344	62574837	25.08	3.57	11.88	0	0	0	COX6B2	ENSBTAG00000007200	1	67.94	protein_coding	T	T	F	F	T	F	F	F	T
18	62700854	62707444	9.33	3.08	8.47	0	0	0	SYT5	ENSBTAG00000002522	1	58.26	protein_coding	T	F	F	F	F	F	F	F	F
18	62717575	62721350	5.35	4.3	19.63	0	0	0	TNNI3	ENSBTAG00000006424	1	59.61	protein_coding	T	F	F	F	F	F	F	F	F
18	62725898	62735263	21.97	6.94	122.96	0	0	0	TNNT1	ENSBTAG00000006419	1	57.9	protein_coding	T	F	F	F	F	F	F	T	F
18	62760766	62773032	2.22	2.92	7.59	0	0	0	EPS8L1	ENSBTAG00000009512	-1	58.37	protein_coding	F	T	F	F	F	F	T	T	T
18	63090945	63104304	6.37	2.34	5.07	0	0	0	TTYH1	ENSBTAG00000003470	1	62.64	protein_coding	F	T	T	F	F	F	F	T	T
18	63146729	63154412	3.07	4.83	28.49	0	0	0	gene:ENSBTAG00000019547	ENSBTAG00000019547	1	63.95	protein_coding	T	F	F	F	F	F	F	F	F
18	63467220	63474744	0.92	4.56	23.51	1.46e-07	6.26e-07	0.00291	OSCAR	ENSBTAG00000001051	1	54.38	protein_coding	T	F	F	F	F	F	F	F	F
18	63607560	63639810	0.25	6.9	119.43	7.67e-08	3.36e-07	0.00153	gene:ENSBTAG00000006961	ENSBTAG00000006961	-1	49.68	protein_coding	T	F	F	F	F	F	F	F	F
18	7931947	7962732	0.67	4.77	27.34	1.17e-09	6e-09	2.34e-05	BCO1	ENSBTAG00000001026	1	50.38	protein_coding	F	T	T	F	F	F	T	F	T
19	14287673	14349579	0.62	3.74	13.34	7.92e-08	3.46e-07	0.00158	HNF1B	ENSBTAG00000004710	-1	49.03	protein_coding	F	F	F	F	F	F	T	T	T
19	16232968	16234839	32.8	2.49	5.62	0	0	0	CCL2	ENSBTAG00000037811	-1	45.51	protein_coding	F	F	F	F	T	F	F	F	F
19	18353810	18388312	0.72	4.73	26.53	6.18e-08	2.72e-07	0.00123	ADAP2	ENSBTAG00000003334	-1	48.93	protein_coding	F	T	F	F	T	F	T	T	F
19	19738612	19757359	0.73	3.85	14.37	1.77e-07	7.57e-07	0.00354	LGALS9	ENSBTAG00000006846	1	53.04	protein_coding	F	F	F	F	F	F	F	F	F
19	20548272	20561593	0.7	4.08	16.87	8.74e-09	4.17e-08	0.000175	FOXN1	ENSBTAG00000013095	1	56.82	protein_coding	F	F	F	F	F	F	F	F	F
19	20588068	20591570	93.72	3.41	10.63	0	0	0	ALDOC	ENSBTAG00000013099	-1	56.27	protein_coding	F	T	F	F	F	F	T	T	T
19	20688679	20696227	2.11	2.12	4.35	2.79e-10	1.5e-09	5.58e-06	PROCA1	ENSBTAG00000017268	-1	54.5	protein_coding	F	T	T	F	F	F	F	T	T
19	20879077	20927187	0.98	4.86	29.14	0	0	0	SEZ6	ENSBTAG00000015979	-1	55.18	protein_coding	F	F	F	F	F	F	T	T	T
19	21426533	21434772	10.66	2.24	4.71	0	0	0	CORO6	ENSBTAG00000001120	-1	61.31	protein_coding	F	T	F	F	F	F	T	T	T
19	23422880	23430667	0.5	6.6	96.71	5.77e-07	2.35e-06	0.01	SERPINF1	ENSBTAG00000009705	1	51.81	protein_coding	F	T	F	F	F	F	T	T	T
19	23559326	23560666	3.83	2.79	6.9	0	0	0	RTN4RL1	ENSBTAG00000012302	-1	65.4	protein_coding	F	T	F	F	F	F	F	F	F
19	25163841	25198117	1.5	4.09	17.09	0	0	0	ATP2A3	ENSBTAG00000014806	-1	56.7	protein_coding	T	T	F	F	F	F	F	F	F
19	27459410	27461845	21.12	3.07	8.37	0	0	0	SLC16A11	ENSBTAG00000020852	-1	64.45	protein_coding	T	T	F	F	F	F	T	T	F
19	27673004	27684649	1.61	2.37	5.17	2.45e-12	1.51e-11	4.9e-08	ACAP1	ENSBTAG00000010527	1	53.86	protein_coding	F	T	F	F	F	F	F	T	T
19	27747547	27749621	8.68	3.67	12.7	0	0	0	TMEM102	ENSBTAG00000031737	1	61.93	protein_coding	T	T	F	F	F	F	T	F	F
19	27751729	27755716	1.34	3.26	9.55	5.67e-07	2.31e-06	0.01	FGF11	ENSBTAG00000019241	1	59.48	protein_coding	T	T	F	F	F	F	T	F	F
19	27955573	27960099	1.72	3.98	15.82	3.66e-14	2.55e-13	7.32e-10	SHBG	ENSBTAG00000004226	1	49.92	protein_coding	T	T	F	F	T	F	T	T	T
19	27973743	27978543	3.81	6.91	120.28	0	0	0	ATP1B2	ENSBTAG00000013680	1	56.93	protein_coding	T	T	F	F	T	F	T	T	T
19	28214105	28220774	0.66	4.24	18.88	3.84e-10	2.03e-09	7.67e-06	KCNAB3	ENSBTAG00000014940	-1	54.3	protein_coding	T	T	F	F	F	F	F	F	F
19	28306791	28315515	5.23	4.34	20.21	0	0	0	ALOX15B	ENSBTAG00000008779	1	56.25	protein_coding	T	T	F	F	F	F	F	F	F
19	28873595	28886401	5	3.19	9.16	0	0	0	CCDC42	ENSBTAG00000018416	-1	48.75	protein_coding	F	F	F	F	F	F	T	F	F
19	29670744	29876650	0.92	3.71	13.11	2.31e-13	1.52e-12	4.61e-09	GAS7	ENSBTAG00000019107	-1	49.29	protein_coding	T	T	F	F	T	F	T	T	F
19	33778487	33811728	0.85	4.37	20.71	9.19e-07	3.68e-06	0.02	LRRC75A	ENSBTAG00000025078	1	55.09	protein_coding	T	F	F	F	T	F	F	T	F
19	33816540	33834542	32.56	3.62	12.33	0	0	0	TRPV2	ENSBTAG00000003014	-1	56.73	protein_coding	T	F	F	F	F	F	F	T	F
19	34668035	34672049	0.32	6.43	86.35	1.11e-06	4.4e-06	0.02	RNF112	ENSBTAG00000000540	-1	66.74	protein_coding	T	F	F	F	F	F	T	F	T
19	36822723	36845371	3.87	2.6	6.06	0	0	0	MYCBPAP	ENSBTAG00000014355	-1	48.94	protein_coding	F	F	T	F	T	F	F	T	T
19	37020550	37026396	14.17	3.77	13.63	0	0	0	TMEM92	ENSBTAG00000040316	-1	52.44	protein_coding	T	F	F	F	F	F	T	F	F
19	37113477	37122446	10.08	5.76	54.34	0	0	0	SGCA	ENSBTAG00000003956	-1	54.92	protein_coding	F	T	F	F	F	F	T	T	T
19	37159424	37176235	1.38	3.72	13.21	3.95e-12	2.4e-11	7.9e-08	SAMD14	ENSBTAG00000040521	1	51.86	protein_coding	T	T	F	T	T	F	F	F	F
19	37314777	37320363	20.39	4.21	18.48	0	0	0	DLX4	ENSBTAG00000007353	-1	57.6	protein_coding	T	T	F	T	F	F	F	F	T
19	37725131	37744573	1.77	5.06	33.3	0	0	0	NGFR	ENSBTAG00000020979	-1	56.04	protein_coding	F	F	F	F	F	F	F	F	F
19	37978510	37985160	3.72	2.52	5.75	0	0	0	PHOSPHO1	ENSBTAG00000000033	1	55.86	protein_coding	T	F	F	F	F	F	T	T	F
19	40226036	40293157	1.72	6.2	73.4	0	0	0	PLXDC1	ENSBTAG00000019347	-1	50.52	protein_coding	F	F	F	F	F	F	F	F	T
19	40655222	40663767	5.23	6.21	73.88	0	0	0	PPP1R1B	ENSBTAG00000006035	1	59.42	protein_coding	F	F	F	F	T	F	F	T	F
19	40753903	40762633	1.53	4.06	16.66	8.98e-14	6.12e-13	1.79e-09	GRB7	ENSBTAG00000017366	1	60.76	protein_coding	T	T	F	F	T	F	T	T	F
19	40868079	40877769	3.55	2.28	4.84	0	0	0	ZPBP2	ENSBTAG00000030523	1	38.85	protein_coding	F	F	F	F	F	F	T	F	F
19	40943950	40955437	1.18	8.18	290.74	0	0	0	GSDMA	ENSBTAG00000010070	1	50.75	protein_coding	F	F	F	F	T	F	F	T	F
19	41017271	41042023	6	2.32	4.98	0	0	0	THRA	ENSBTAG00000010745	1	57.88	protein_coding	T	T	F	T	F	F	T	T	T
19	41109870	41122210	1.17	3.45	10.95	3.46e-11	1.96e-10	6.91e-07	RAPGEFL1	ENSBTAG00000015232	1	55.51	protein_coding	F	F	F	F	T	F	T	T	F
19	42356580	42361365	33.89	2.36	5.15	0	0	0	KRT15	ENSBTAG00000004903	-1	56.77	protein_coding	F	T	F	F	T	F	F	F	F
19	42366660	42370493	1279.29	2.15	4.43	0	0	0	KRT19	ENSBTAG00000004905	-1	60.62	protein_coding	F	T	F	F	T	F	F	F	F
19	42430195	42434559	355.18	2.92	7.56	0	0	0	KRT14	ENSBTAG00000007583	-1	55.51	protein_coding	F	T	F	F	T	F	F	F	F
19	43380114	43394478	0.82	3.77	13.62	0	0	0	CNTNAP1	ENSBTAG00000019097	1	56.9	protein_coding	T	T	F	F	T	F	T	F	F
19	43452812	43467553	0.48	3.61	12.25	6.44e-10	3.35e-09	1.29e-05	WNK4	ENSBTAG00000019907	1	53.74	protein_coding	T	T	F	F	F	F	T	T	T
19	43514251	43544945	2.12	2.48	5.56	0	0	0	AOC3	ENSBTAG00000030333	1	51.59	protein_coding	F	T	F	F	F	F	F	F	F
19	43696266	43700032	8.21	2.69	6.45	0	0	0	RND2	ENSBTAG00000007393	1	55.77	protein_coding	T	T	F	F	F	F	T	F	F
19	44387968	44412456	1.68	2.22	4.66	4.54e-11	2.55e-10	9.07e-07	MPP2	ENSBTAG00000001279	-1	50.71	protein_coding	T	F	F	F	F	F	F	F	F
19	44486048	44491268	0.83	4.04	16.42	9.62e-09	4.58e-08	0.000192	NAGS	ENSBTAG00000016249	1	59.36	protein_coding	F	T	F	F	F	F	T	T	T
19	44614052	44621587	4.44	3.49	11.26	0	0	0	ASB16	ENSBTAG00000019658	1	51.29	protein_coding	F	T	F	F	F	F	F	T	F
19	44742151	44751739	6.18	3	7.98	0	0	0	RUNDC3A	ENSBTAG00000001615	1	58.79	protein_coding	T	T	F	F	F	F	F	F	T
19	44782788	44792763	1.38	2.76	6.77	5.08e-12	3.06e-11	1.02e-07	FAM171A2	ENSBTAG00000011447	-1	60.37	protein_coding	T	F	F	F	T	F	F	T	T
19	45113921	45131794	1.13	2.38	5.2	4.23e-08	1.89e-07	0.000844	ADAM11	ENSBTAG00000001735	1	58.42	protein_coding	F	T	F	F	F	F	T	T	F
19	45288725	45295349	11.6	3.71	13.11	0	0	0	C1QL1	ENSBTAG00000011759	-1	55.94	protein_coding	F	F	F	F	T	F	T	T	F
19	46524375	46644713	1.12	3.82	14.11	5.91e-12	3.55e-11	1.18e-07	MAPT	ENSBTAG00000017512	1	49.52	protein_coding	T	F	F	F	T	F	T	T	T
19	50579227	50604298	4.93	3	8.01	0	0	0	RAB40B	ENSBTAG00000015387	1	48.76	protein_coding	T	T	F	F	F	F	T	T	F
19	51243972	51255385	12.78	4.51	22.75	0	0	0	SLC16A3	ENSBTAG00000017461	-1	61.63	protein_coding	T	F	F	F	T	F	F	T	T
19	51601521	51601969	18.56	3.48	11.17	0	0	0	NPB	ENSBTAG00000013898	-1	70.38	protein_coding	F	T	F	F	T	F	T	T	T
19	52679104	52685498	0.78	3.16	8.94	3.3e-07	1.37e-06	0.00659	NPTX1	ENSBTAG00000008940	1	59.89	protein_coding	T	F	F	F	F	F	F	F	T
19	53623087	53953037	0.63	4.9	29.93	3.65e-13	2.37e-12	7.29e-09	RBFOX3	ENSBTAG00000006280	1	53.99	protein_coding	T	F	F	F	F	F	F	F	F
19	54537794	54543367	2.04	2.14	4.4	1.96e-06	7.57e-06	0.04	gene:ENSBTAG00000009029	ENSBTAG00000009029	1	61.21	protein_coding	F	F	F	F	F	F	F	T	T
19	55669706	55674680	14.96	2.06	4.17	0	0	0	METTL23	ENSBTAG00000044138	-1	44.2	protein_coding	F	T	F	F	F	F	T	T	T
19	56402887	56418246	1.36	2.15	4.43	9.15e-13	5.82e-12	1.83e-08	UNC13D	ENSBTAG00000013556	1	61.12	protein_coding	F	T	F	F	F	F	T	T	F
19	57076159	57097117	3.79	2.59	6	0	0	0	HID1	ENSBTAG00000010809	1	58.91	protein_coding	T	F	F	F	F	F	F	T	T
19	57097872	57105114	3.3	5.5	45.32	0	0	0	OTOP3	ENSBTAG00000040111	-1	56.52	protein_coding	T	F	F	F	F	F	F	F	F
19	57141972	57157895	9.87	6.07	67.36	0	0	0	FADS6	ENSBTAG00000017242	1	54.45	protein_coding	T	F	F	F	F	F	F	T	F
19	57194107	57204958	0.49	7.99	254.58	2.22e-16	1.75e-15	4.44e-12	GRIN2C	ENSBTAG00000040042	1	61.68	protein_coding	T	F	F	T	F	F	T	T	T
19	57289296	57398998	1.21	2.71	6.55	2.95e-07	1.23e-06	0.0059	RAB37	ENSBTAG00000008092	-1	51.33	protein_coding	T	T	T	T	F	F	F	T	T
19	57726115	57753535	0.64	8.07	268.81	5.55e-16	4.28e-15	1.11e-11	KIF19	ENSBTAG00000004617	-1	58.66	protein_coding	F	F	F	F	F	F	F	F	F
19	9697827	9707120	34.9	2.19	4.58	0	0	0	2019-09-04	ENSBTAG00000015368	-1	56.91	protein_coding	F	T	F	F	F	F	F	T	T
2	106936887	106940905	0.78	4.47	22.15	4.88e-10	2.56e-09	9.76e-06	CXCR1	ENSBTAG00000026753	-1	48.89	protein_coding	F	T	F	F	F	F	T	T	F
2	107011785	107014997	33.95	3.33	10.04	0	0	0	GPBAR1	ENSBTAG00000003923	1	61.9	protein_coding	F	T	F	F	T	F	T	T	T
2	107936557	107942525	5.66	3.67	12.75	0	0	0	TUBA1D	ENSBTAG00000030973	1	50.85	protein_coding	T	T	F	F	T	F	F	T	T
2	107958895	107978251	2.24	2.86	7.26	0	0	0	PTPRN	ENSBTAG00000013798	-1	52.97	protein_coding	F	T	F	T	T	F	F	F	F
2	116619949	116644855	1.21	5.28	38.88	0	0	0	SLC19A3	ENSBTAG00000021325	-1	40.72	protein_coding	T	F	F	F	F	F	T	T	T
2	118596201	118598002	2.03	9	510.68	0	0	0	CD24	ENSBTAG00000039046	1	36.68	protein_coding	T	F	F	F	F	F	T	F	F
2	120925717	120933239	2.36	5	31.99	0	0	0	ECEL1	ENSBTAG00000021050	-1	63.75	protein_coding	T	F	F	F	F	F	F	F	F
2	121400544	121444433	3.79	3.78	13.72	0	0	0	AZIN2	ENSBTAG00000020548	-1	46.66	protein_coding	T	F	F	F	F	F	T	T	T
2	121604099	121611301	41.71	2.48	5.59	0	0	0	TMEM54	ENSBTAG00000008331	1	56.71	protein_coding	F	F	F	F	F	F	F	T	F
2	121610859	121616754	6.71	3.43	10.8	0	0	0	HPCA	ENSBTAG00000008336	-1	53.44	protein_coding	T	F	F	F	F	F	F	T	F
2	122092889	122113823	1.28	2.72	6.57	2.58e-09	1.29e-08	5.15e-05	LCK	ENSBTAG00000012695	-1	48.87	protein_coding	T	T	F	T	T	F	T	T	F
2	122121403	122128496	6.82	2.86	7.24	0	0	0	MTMR9_1	ENSBTAG00000014390	1	55.61	protein_coding	F	F	F	F	F	F	F	T	F
2	122436872	122468429	0.7	4.86	29.09	4.47e-13	2.89e-12	8.94e-09	SPOCD1	ENSBTAG00000015715	1	46.73	protein_coding	T	F	F	F	F	F	F	F	F
2	122503653	122533252	4.32	4.54	23.33	0	0	0	ADGRB2	ENSBTAG00000010657	1	59.33	protein_coding	T	F	F	F	F	F	F	F	T
2	124819576	124906896	1.92	2.72	6.58	0	0	0	PTPRU	ENSBTAG00000012848	-1	51.57	protein_coding	T	F	F	T	F	F	T	F	F
2	126058353	126070741	3.56	2.55	5.85	0	0	0	THEMIS2	ENSBTAG00000006223	-1	53.65	protein_coding	T	F	F	F	F	F	T	T	T
2	126246561	126250182	40.41	4.21	18.48	0	0	0	IFI6	ENSBTAG00000007554	1	52.15	protein_coding	F	T	F	F	F	F	F	F	T
2	126490904	126494833	2.37	7.52	183.2	2.65e-11	1.51e-10	5.29e-07	CD164L2	ENSBTAG00000019728	1	59.31	protein_coding	T	F	F	F	F	F	T	T	T
2	127647571	127665188	0.65	4.81	28.07	1.78e-15	1.34e-14	3.55e-11	EXTL1	ENSBTAG00000006349	-1	53.26	protein_coding	T	F	F	F	F	F	T	T	F
2	127813023	127818513	3.79	2.37	5.17	1.52e-13	1.01e-12	3.04e-09	PAQR7	ENSBTAG00000021787	1	51.05	protein_coding	F	F	F	F	F	F	T	T	T
2	129969269	130018036	2.38	3.02	8.1	0	0	0	ASAP3	ENSBTAG00000012263	1	50.71	protein_coding	T	T	F	F	T	F	T	F	T
2	130023501	130069587	2.49	2.12	4.36	2.21e-09	1.11e-08	4.41e-05	TCEA3	ENSBTAG00000038865	1	50.04	protein_coding	F	T	T	T	T	F	T	T	T
2	130245902	130247035	1.79	2.72	6.58	4.65e-08	2.07e-07	0.000928	HTR1D	ENSBTAG00000040329	1	55.11	protein_coding	T	F	F	F	F	F	T	T	T
2	131706265	131776123	4.52	2.6	6.05	0	0	0	RAP1GAP	ENSBTAG00000008952	1	58.81	protein_coding	T	T	F	F	F	F	T	T	T
2	135891757	135920584	4.93	5.4	42.23	0	0	0	PADI3	ENSBTAG00000012043	-1	57.26	protein_coding	F	F	F	F	F	F	F	T	F
2	136049644	136103406	10.15	4.5	22.57	0	0	0	PADI2	ENSBTAG00000003403	1	54.55	protein_coding	T	T	F	F	F	F	T	F	F
2	136187693	136192151	56.52	2.83	7.11	0	0	0	MFAP2	ENSBTAG00000003832	1	66.2	protein_coding	T	F	F	F	F	F	F	F	F
2	136480737	136491543	4.09	2.47	5.56	0	0	0	ARHGEF19	ENSBTAG00000005670	1	62.66	protein_coding	T	T	F	F	F	F	F	T	F
2	136610244	136617316	18.02	4.39	21.04	0	0	0	FAM131C	ENSBTAG00000034680	1	60.75	protein_coding	T	F	F	F	F	F	F	F	F
2	23644876	23974945	1.35	2.29	4.91	3.33e-15	2.46e-14	6.66e-11	RAPGEF4	ENSBTAG00000020984	-1	41.68	protein_coding	F	T	F	T	T	F	T	T	F
2	36557431	36648018	5.48	3.84	14.31	0	0	0	LY75	ENSBTAG00000017797	1	38.73	protein_coding	F	T	F	F	T	F	T	T	F
2	37593290	37620037	20.88	3.48	11.13	0	0	0	DAPL1	ENSBTAG00000032481	-1	39.27	protein_coding	F	T	T	F	T	F	T	T	T
2	44546002	44754701	0.1	3.09	8.52	1.03e-09	5.28e-09	2.05e-05	NEB	ENSBTAG00000006907	1	39.08	protein_coding	F	F	T	F	F	F	T	T	T
2	47315201	47472004	2.66	6.89	118.85	0	0	0	KIF5C	ENSBTAG00000018125	-1	43.94	protein_coding	F	F	F	F	T	F	T	F	F
2	65056070	65141738	0.79	4.45	21.82	0	0	0	NCKAP5	ENSBTAG00000005238	1	40.9	protein_coding	F	F	F	F	F	F	T	F	F
2	6716591	6740329	1.18	2.11	4.31	1.17e-06	4.63e-06	0.02	SLC40A1	ENSBTAG00000010498	1	40.24	protein_coding	F	T	F	F	F	F	T	F	F
2	71607734	71613808	8.57	2.7	6.5	0	0	0	TMEM37	ENSBTAG00000026825	1	53.84	protein_coding	F	F	F	F	F	F	T	T	T
2	79255849	79304396	1.41	4.86	28.99	3.03e-10	1.62e-09	6.05e-06	GYPC	ENSBTAG00000014863	1	48.64	protein_coding	F	F	F	F	F	F	F	F	T
2	79975339	80043984	2.18	3.58	11.96	1.95e-11	1.12e-10	3.89e-07	STAT4	ENSBTAG00000046699	-1	37.95	protein_coding	F	T	F	T	F	F	F	T	T
2	8901432	9030989	1.76	2.05	4.15	1.69e-14	1.2e-13	3.37e-10	CALCRL	ENSBTAG00000008483	1	35.72	protein_coding	F	F	F	F	F	F	F	F	F
2	97843887	97988140	0.87	3.19	9.12	0	0	0	MAP2	ENSBTAG00000018130	1	36.91	protein_coding	F	F	F	F	F	F	T	T	T
20	2583486	2610136	3.96	3.25	9.54	0	0	0	GABRP	ENSBTAG00000002779	1	44.26	protein_coding	F	T	F	F	T	F	F	F	T
20	31484954	31510630	1.06	4.08	16.87	3.74e-09	1.85e-08	7.48e-05	NIM1K	ENSBTAG00000006233	-1	45.81	protein_coding	F	F	T	F	F	F	T	T	T
20	324518	507045	4.11	3.02	8.12	0	0	0	SLIT3	ENSBTAG00000017746	-1	48.54	protein_coding	F	F	F	F	F	F	F	F	F
20	37596604	37679976	0.5	2.76	6.76	2.03e-07	8.6e-07	0.00405	SLC1A3	ENSBTAG00000018245	-1	41.18	protein_coding	F	T	F	F	F	F	T	T	T
20	38272477	38300277	6.69	4.28	19.38	0	0	0	CAPSL	ENSBTAG00000012688	1	44.33	protein_coding	F	F	F	F	F	F	T	T	T
20	58634394	58664249	4.39	3.16	8.92	0	0	0	FAM105A	ENSBTAG00000000672	-1	47.31	protein_coding	F	F	F	F	T	F	T	F	F
20	6760173	6794112	24.28	2.38	5.22	0	0	0	gene:ENSBTAG00000034138	ENSBTAG00000034138	1	42.61	protein_coding	T	F	F	F	F	F	T	T	T
20	71182950	71208407	1.74	8.78	438.85	0	0	0	SLC6A3	ENSBTAG00000015843	1	62.17	protein_coding	F	F	F	F	F	F	F	F	F
20	71395142	71420351	4.24	2.99	7.95	0	0	0	SLC12A7	ENSBTAG00000006775	1	66.23	protein_coding	T	T	F	F	F	F	F	T	F
21	21612427	21614657	1.98	2.14	4.39	2.17e-06	8.34e-06	0.04	MESP2	ENSBTAG00000027058	1	61.59	protein_coding	T	F	F	F	F	F	T	F	F
21	21620139	21637144	17.18	2.05	4.13	0	0	0	ANPEP	ENSBTAG00000016881	-1	52.66	protein_coding	T	F	F	F	F	F	T	F	F
21	22741477	22744781	5.85	2.12	4.36	3.07e-08	1.39e-07	0.000613	NMB	ENSBTAG00000001388	-1	56.28	protein_coding	F	F	F	F	F	F	T	T	T
21	23309725	23333820	1.41	2.83	7.11	5.32e-07	2.18e-06	0.01	gene:ENSBTAG00000000623	ENSBTAG00000000623	-1	50.24	protein_coding	F	F	F	F	F	F	T	T	F
21	25714965	25816371	0.38	4.99	31.88	4.48e-11	2.52e-10	8.95e-07	RASGRF1	ENSBTAG00000019940	-1	50.97	protein_coding	T	F	F	F	F	F	T	F	F
21	29296001	29340066	3.42	3.38	10.39	0	0	0	TARSL2	ENSBTAG00000007651	1	44.98	protein_coding	F	F	T	F	T	F	T	T	F
21	31258091	31265286	2.53	4.53	23.18	6.77e-15	4.92e-14	1.35e-10	CRABP1	ENSBTAG00000012909	1	51.56	protein_coding	F	F	F	F	F	F	F	F	F
21	31500106	31512927	9.36	2.71	6.53	0	0	0	CHRNA3	ENSBTAG00000003130	-1	45.99	protein_coding	F	F	F	F	F	F	F	F	F
21	32107362	32113036	1.14	3.35	10.2	2.69e-10	1.44e-09	5.37e-06	ISL2	ENSBTAG00000016651	1	58.08	protein_coding	T	F	F	F	F	F	T	T	F
21	33292504	33294348	0.74	3.3	9.86	2.74e-07	1.15e-06	0.00548	LINGO1	ENSBTAG00000023147	-1	64.12	protein_coding	T	F	F	T	F	F	F	F	F
21	34088422	34109601	1.33	3.18	9.04	0	0	0	SCAMP5	ENSBTAG00000021318	-1	48.74	protein_coding	T	F	F	F	F	F	T	T	T
21	34878677	34901785	9.6	2.27	4.82	0	0	0	STRA6	ENSBTAG00000007348	1	56.62	protein_coding	F	F	F	T	T	F	F	F	F
21	34903758	34906887	2.71	4.74	26.66	0	0	0	ISLR	ENSBTAG00000006024	-1	60.83	protein_coding	F	F	F	T	F	F	T	T	F
21	4001555	4086821	0.7	3.95	15.42	1.22e-10	6.67e-10	2.44e-06	GABRB3	ENSBTAG00000013422	-1	40.77	protein_coding	F	F	F	F	F	F	F	F	F
21	41948039	41961275	1.89	2.97	7.85	1.06e-13	7.13e-13	2.11e-09	COCH	ENSBTAG00000021844	1	40.33	protein_coding	F	F	F	F	F	F	T	T	F
21	55515505	55549383	0.98	5.61	49	7.77e-16	5.94e-15	1.55e-11	TGM5	ENSBTAG00000032059	-1	45.5	protein_coding	F	T	T	F	T	F	T	F	F
21	55553635	55579813	0.91	4.06	16.62	9.68e-12	5.72e-11	1.93e-07	TGM7	ENSBTAG00000015412	-1	45.34	protein_coding	F	T	F	F	T	F	T	F	F
21	55877337	55882400	31.18	5.02	32.49	0	0	0	CKMT1	ENSBTAG00000007502	1	50.34	protein_coding	T	F	F	F	F	F	T	T	F
21	58163028	58176319	4.75	3.41	10.61	0	0	0	CHGA	ENSBTAG00000009836	1	55.4	protein_coding	F	F	F	F	F	F	F	F	F
21	59397853	59491932	0.43	7.35	162.87	8.5e-09	4.06e-08	0.00017	PPP4R4	ENSBTAG00000009891	1	38.05	protein_coding	F	T	F	F	F	F	F	F	T
21	61618876	61653533	1.27	2.06	4.18	1.13e-09	5.78e-09	2.25e-05	CLMN	ENSBTAG00000019916	-1	48	protein_coding	F	F	F	F	F	F	F	F	F
21	62895825	62964704	1.91	2.07	4.2	5.23e-10	2.74e-09	1.04e-05	AK7	ENSBTAG00000016854	1	44.97	protein_coding	F	F	F	F	F	F	T	T	T
21	70313782	70351845	0.17	7.03	130.34	5.75e-09	2.79e-08	0.000115	KIF26A	ENSBTAG00000021904	1	67.04	protein_coding	T	T	F	F	T	F	F	F	F
21	70845971	70861972	10.46	3.5	11.32	0	0	0	ADSSL1	ENSBTAG00000017616	1	65.77	protein_coding	T	F	F	F	F	F	F	T	T
22	12015691	12118718	0.18	4.74	26.75	4.55e-08	2.03e-07	0.000909	SCN5A	ENSBTAG00000009155	-1	52.51	protein_coding	F	F	F	F	F	F	F	F	F
22	12681779	12688177	11.62	5.46	44.06	0	0	0	gene:ENSBTAG00000015493	ENSBTAG00000015493	1	51.05	protein_coding	F	F	F	F	F	F	T	T	T
22	13271526	13302316	3.85	3.32	10.02	0	0	0	ENTPD3	ENSBTAG00000011702	1	43.96	protein_coding	T	T	F	F	T	F	T	F	F
22	16415882	16442510	0.75	3.81	14.04	2.67e-09	1.33e-08	5.34e-05	ZKSCAN7	ENSBTAG00000003622	1	43.27	protein_coding	F	T	F	F	F	F	T	T	T
22	16857729	16863951	3.14	4.99	31.79	0	0	0	PRRT3	ENSBTAG00000010836	1	58.96	protein_coding	F	T	F	F	F	F	T	T	T
22	17961211	18018234	7.71	2.06	4.17	0	0	0	LMCD1	ENSBTAG00000005431	-1	48.12	protein_coding	F	F	F	F	F	F	T	T	T
22	37900573	38097884	0.64	3.24	9.42	3.49e-07	1.45e-06	0.00698	SYNPR	ENSBTAG00000000265	-1	42.14	protein_coding	F	F	F	F	F	F	F	F	F
22	48999619	49008847	0.45	3.16	8.97	8.92e-07	3.57e-06	0.02	SEMA3G	ENSBTAG00000046924	1	60.71	protein_coding	F	F	F	F	T	F	T	T	F
22	50360693	50369136	1.91	2.07	4.19	2.29e-11	1.31e-10	4.57e-07	C22H3ORF18	ENSBTAG00000010165	1	58.08	protein_coding	F	T	F	F	T	F	F	F	F
22	50538717	50555513	0.68	8.07	269.05	2.22e-16	1.75e-15	4.44e-12	CACNA2D2	ENSBTAG00000009489	1	59.74	protein_coding	T	T	F	F	F	F	F	F	F
22	50600489	50601799	28.99	3.12	8.69	0	0	0	gene:ENSBTAG00000000483	ENSBTAG00000000483	1	59.19	protein_coding	F	T	F	F	F	F	F	T	T
22	50608457	50609166	15.08	2.35	5.08	0	0	0	gene:ENSBTAG00000047200	ENSBTAG00000047200	-1	63.66	protein_coding	F	T	F	F	F	F	T	T	T
22	50702769	50717523	0.96	5.98	63.19	0	0	0	SLC38A3	ENSBTAG00000008509	-1	59.38	protein_coding	F	T	F	F	F	F	F	T	T
22	50928327	50941427	1.19	3.31	9.95	0	0	0	MST1R	ENSBTAG00000015046	1	57.55	protein_coding	T	F	F	F	T	F	T	F	T
22	50957515	50969031	2.88	4.75	27	0	0	0	CAMKV	ENSBTAG00000004878	1	56.92	protein_coding	T	F	F	F	F	F	T	T	T
22	53338691	53343856	0.56	6.67	101.89	2.52e-07	1.06e-06	0.00504	gene:ENSBTAG00000005019	ENSBTAG00000005019	1	56.47	protein_coding	F	F	F	T	T	F	T	T	T
22	54791195	54797301	4.25	5.49	44.98	0	0	0	CLEC3B	ENSBTAG00000018331	-1	57.38	protein_coding	T	T	F	F	T	F	T	T	F
22	55929988	55931463	2.29	3.45	10.91	2.22e-16	1.75e-15	4.44e-12	HRH1	ENSBTAG00000001447	1	56.03	protein_coding	F	F	F	F	F	F	T	T	F
22	56774467	56824220	1.74	3.18	9.06	0	0	0	PLXND1	ENSBTAG00000001814	1	61.64	protein_coding	T	F	F	F	F	F	F	F	F
22	56990323	57017221	1.68	2.42	5.35	0	0	0	CAND2	ENSBTAG00000015273	-1	54.64	protein_coding	T	F	F	F	T	F	T	T	F
22	57027958	57060239	35.91	4.89	29.69	0	0	0	TMEM40	ENSBTAG00000000161	1	47.41	protein_coding	T	T	F	F	T	F	T	T	F
22	58037233	58148743	0.67	3.55	11.73	3.22e-15	2.38e-14	6.43e-11	FGD5	ENSBTAG00000006789	-1	55.13	protein_coding	T	T	F	F	T	F	T	T	T
22	59089634	59103701	10.77	2.78	6.89	0	0	0	HDAC11	ENSBTAG00000007208	-1	61.39	protein_coding	T	F	F	F	F	F	F	F	F
22	60507746	60556978	8.73	3.14	8.81	0	0	0	PODXL2	ENSBTAG00000018031	-1	53.21	protein_coding	T	F	F	F	F	F	T	F	F
22	60960190	61060022	6.75	2.08	4.22	3.25e-09	1.61e-08	6.49e-05	CHCHD6	ENSBTAG00000030855	-1	54.2	protein_coding	T	F	F	F	F	F	T	T	T
22	61133594	61160689	2.31	2.53	5.79	8.98e-14	6.12e-13	1.79e-09	UROC1	ENSBTAG00000008774	1	61.39	protein_coding	T	F	F	F	F	F	T	F	F
22	61319021	61344873	2.72	5.05	33.02	0	0	0	CFAP100	ENSBTAG00000019402	1	60.1	protein_coding	T	F	F	F	F	F	T	F	F
23	13160210	13172869	2.05	4.63	24.79	0	0	0	KCNK17	ENSBTAG00000010328	-1	56.22	protein_coding	T	T	F	F	T	F	T	T	F
23	15901126	15908139	35	3.01	8.08	0	0	0	GUCA1A	ENSBTAG00000012823	1	52.83	protein_coding	T	T	F	F	F	F	T	T	F
23	17138206	17151448	5.14	2.6	6.05	7.65e-14	5.24e-13	1.53e-09	RSPH9	ENSBTAG00000009549	1	53.99	protein_coding	F	T	F	F	F	F	T	T	F
23	17807298	17820479	1.56	6.54	92.77	0	0	0	CAPN11	ENSBTAG00000021066	1	52.8	protein_coding	F	T	F	T	F	F	F	T	F
23	19388894	19395134	13.1	3.08	8.48	0	0	0	ENPP5	ENSBTAG00000015829	-1	42.67	protein_coding	F	F	F	F	F	F	T	F	T
23	24588032	24627769	21.01	2.18	4.52	0	0	0	EFHC1	ENSBTAG00000017810	1	42.29	protein_coding	F	T	F	F	T	F	T	T	T
23	24823643	24837430	7.01	2.47	5.52	0	0	0	GSTA2	ENSBTAG00000006546	-1	43.29	protein_coding	F	F	F	F	F	F	T	T	F
23	24875608	24890466	1.2	7.08	135.43	4.24e-09	2.08e-08	8.48e-05	GSTA3_1	ENSBTAG00000021516	-1	44.61	protein_coding	F	F	F	F	F	F	T	T	T
23	25458594	25476944	6.51	2.72	6.59	0	0	0	gene:ENSBTAG00000013919	ENSBTAG00000013919	1	41.34	protein_coding	F	F	F	F	F	F	T	T	T
23	27085415	27136954	0.23	2.94	7.65	6.48e-10	3.37e-09	1.3e-05	TNXB	ENSBTAG00000001444	-1	55.32	protein_coding	F	F	F	F	T	F	F	T	F
23	27225270	27231292	5.54	3.39	10.47	0	0	0	CFB	ENSBTAG00000046158	-1	53.98	protein_coding	F	T	F	F	F	F	T	F	T
23	27231725	27243367	1.92	3.89	14.83	0	0	0	C2	ENSBTAG00000007450	-1	51.02	protein_coding	F	T	F	F	F	F	F	T	T
23	27291966	27305337	0.4	6.98	126.27	5.34e-08	2.37e-07	0.00107	SLC44A4	ENSBTAG00000005675	1	52.42	protein_coding	F	T	F	F	F	F	T	T	T
23	27356320	27365002	14.32	3.02	8.12	0	0	0	VWA7	ENSBTAG00000005630	-1	54.61	protein_coding	F	T	F	F	F	F	T	T	T
23	27374176	27375211	4.99	2.51	5.7	1.75e-10	9.5e-10	3.51e-06	gene:ENSBTAG00000039620	ENSBTAG00000039620	-1	47.49	protein_coding	F	F	F	F	F	F	T	T	T
23	27407611	27410285	49.74	2.78	6.86	0	0	0	LY6G6C	ENSBTAG00000000585	1	53.72	protein_coding	F	T	F	T	F	F	T	T	T
23	27600055	27604052	2.14	2.09	4.25	1.8e-07	7.65e-07	0.00359	gene:ENSBTAG00000008959	ENSBTAG00000008959	1	52.68	protein_coding	T	F	F	F	F	F	T	T	T
23	27659363	27729750	11.48	2.18	4.54	0	0	0	MIC1	ENSBTAG00000010166	-1	48.09	protein_coding	T	T	F	F	T	F	T	T	T
23	28775534	28803895	1.73	2.28	4.86	2.33e-15	1.74e-14	4.66e-11	GABBR1	ENSBTAG00000017239	1	50.74	protein_coding	T	F	F	F	F	F	T	F	F
23	31067027	31073582	0.66	3.87	14.57	7.51e-08	3.29e-07	0.0015	PRSS16	ENSBTAG00000012461	-1	51.85	protein_coding	T	F	F	F	F	F	T	T	F
23	40616330	40677006	5.7	4.01	16.06	0	0	0	GMPR	ENSBTAG00000015743	-1	47.9	protein_coding	T	F	F	F	T	F	F	F	F
23	42335199	42354922	4.35	2.18	4.53	3.33e-16	2.6e-15	6.66e-12	CD83	ENSBTAG00000031430	-1	46.84	protein_coding	T	T	F	F	F	F	F	T	F
23	50550187	50568522	2.08	2.55	5.84	4.18e-08	1.87e-07	0.000836	gene:ENSBTAG00000017949	ENSBTAG00000017949	-1	46.1	protein_coding	F	F	F	F	F	F	T	T	F
23	7186801	7193645	6.3	5.2	36.79	0	0	0	HLA-DMB	ENSBTAG00000012451	-1	50.31	protein_coding	T	F	F	F	F	F	T	F	T
24	19819065	20129055	0.26	6.34	81.18	2.12e-06	8.18e-06	0.04	CELF4	ENSBTAG00000004940	1	54.85	protein_coding	T	F	F	F	F	F	T	T	F
24	2858679	2910274	1.08	2.46	5.51	1.96e-12	1.22e-11	3.91e-08	ZNF516	ENSBTAG00000004650	1	51.22	protein_coding	F	F	F	F	F	F	T	F	F
24	39312037	39404644	0.51	3.65	12.56	2.67e-11	1.52e-10	5.33e-07	EPB41L3	ENSBTAG00000019251	-1	43.03	protein_coding	F	F	F	F	F	F	T	T	F
24	43217455	43224463	7.11	3.39	10.48	2.58e-11	1.47e-10	5.15e-07	gene:ENSBTAG00000046547	ENSBTAG00000046547	1	52.7	protein_coding	T	T	F	F	T	F	F	T	T
24	43231407	43232698	8.55	3.74	13.37	0	0	0	gene:ENSBTAG00000047609	ENSBTAG00000047609	-1	53.48	protein_coding	T	T	F	F	T	F	T	T	T
24	850316	872350	1.46	6.17	72.04	1.22e-15	9.25e-15	2.44e-11	KCNG2	ENSBTAG00000013665	-1	54.65	protein_coding	F	F	F	F	F	F	F	T	F
25	1054501	1066815	1.53	6.05	66.3	0	0	0	BAIAP3	ENSBTAG00000014100	1	65.98	protein_coding	T	F	F	F	F	F	F	F	F
25	1486479	1492437	5.69	2.31	4.95	3.05e-14	2.13e-13	6.1e-10	HS3ST6	ENSBTAG00000019249	-1	63.65	protein_coding	F	T	F	F	T	F	F	F	T
25	1545800	1549999	7.25	2.82	7.06	0	0	0	SYNGR3	ENSBTAG00000008504	1	62.9	protein_coding	T	T	F	F	F	F	F	F	F
25	1571169	1571725	2.26	4.31	19.78	9.01e-09	4.29e-08	0.00018	NPW	ENSBTAG00000046703	1	76.84	protein_coding	T	T	F	F	F	F	F	F	F
25	1575649	1589619	9.1	3.03	8.19	0	0	0	SLC9A3R2	ENSBTAG00000013479	1	61.99	protein_coding	T	T	F	F	F	F	F	F	F
25	1680110	1686192	41.24	4.35	20.36	0	0	0	RAB26	ENSBTAG00000000279	1	64.1	protein_coding	T	T	F	F	T	F	F	T	T
25	18838854	19180607	0.16	2.68	6.43	4.35e-07	1.79e-06	0.00869	DNAH3	ENSBTAG00000018560	-1	45.38	protein_coding	F	T	F	F	F	F	T	T	F
25	19283503	19307061	1.88	3.19	9.16	1.66e-10	8.99e-10	3.31e-06	CRYM	ENSBTAG00000009842	-1	41.38	protein_coding	T	F	F	F	F	F	T	T	F
25	208739	209518	5.71	2.02	4.04	4.18e-08	1.87e-07	0.000835	HBM	ENSBTAG00000038757	1	66.41	protein_coding	T	F	F	F	F	F	T	T	F
25	21597704	21620834	0.84	3	8	6.02e-08	2.66e-07	0.0012	ERN2	ENSBTAG00000014456	-1	52.44	protein_coding	F	T	F	F	F	F	T	T	F
25	2372471	2377363	1.84	3.05	8.3	1.69e-10	9.15e-10	3.37e-06	KREMEN2	ENSBTAG00000020190	1	63.63	protein_coding	T	F	F	F	F	F	F	F	F
25	2478689	2488857	1.71	7.03	131.02	0	0	0	MMP25	ENSBTAG00000016424	1	60.03	protein_coding	T	T	F	F	T	F	F	F	F
25	25233186	25268874	1.14	3.71	13.05	3.01e-13	1.97e-12	6.02e-09	IL21R	ENSBTAG00000019567	1	49.41	protein_coding	T	F	F	F	F	F	T	T	F
25	26340079	26341408	2.81	2.57	5.95	3.16e-07	1.32e-06	0.00631	NUPR1	ENSBTAG00000018016	-1	56.62	protein_coding	F	T	F	F	T	F	T	T	F
25	26392492	26397916	3.49	2.99	7.97	0	0	0	CORO1A	ENSBTAG00000008631	-1	63.13	protein_coding	T	T	F	F	T	F	T	T	F
25	26513088	26518561	1.71	4.2	18.33	0	0	0	DOC2A	ENSBTAG00000005031	1	60.47	protein_coding	T	T	F	F	T	F	F	F	F
25	26620088	26640306	1.33	2.95	7.75	0	0	0	SEZ6L2	ENSBTAG00000007955	1	51.69	protein_coding	T	T	F	F	T	F	T	T	T
25	26747355	26762056	51.89	3.21	9.24	0	0	0	QPRT	ENSBTAG00000018082	-1	49.6	protein_coding	F	F	T	F	F	F	T	T	T
25	26765631	26769345	5.31	6.13	70.04	0	0	0	SPN	ENSBTAG00000026326	-1	54.51	protein_coding	F	F	T	F	F	F	T	T	T
25	26817914	26821527	2.17	2.02	4.06	3.65e-09	1.8e-08	7.29e-05	2019-09-01	ENSBTAG00000021219	-1	56.89	protein_coding	F	T	F	F	F	F	T	T	F
25	292324	299280	1.71	5.74	53.53	0	0	0	RGS11	ENSBTAG00000016574	-1	64.11	protein_coding	F	T	F	F	F	F	F	F	F
25	33983208	33987224	6.24	2.11	4.31	2.97e-11	1.69e-10	5.94e-07	METTL27	ENSBTAG00000001374	1	58.35	protein_coding	T	F	F	F	T	F	T	T	T
25	33988117	33989662	31.74	3.45	10.9	0	0	0	CLDN4	ENSBTAG00000026278	-1	61.25	protein_coding	T	F	F	F	T	F	T	T	T
25	34734996	34767438	4.65	2.26	4.8	3.89e-13	2.52e-12	7.77e-09	STYXL1	ENSBTAG00000009461	-1	47.35	protein_coding	F	F	F	T	F	F	F	T	F
25	35018574	35023604	8.31	2.22	4.67	0	0	0	UPK3B	ENSBTAG00000021430	1	64.84	protein_coding	F	T	F	F	T	F	F	T	F
25	35064384	35086718	16.74	2.26	4.8	0	0	0	gene:ENSBTAG00000005448	ENSBTAG00000005448	1	60.3	protein_coding	T	T	F	F	T	F	F	F	F
25	36300532	36305041	21.26	5.97	62.66	0	0	0	ACHE	ENSBTAG00000001139	1	60.82	protein_coding	T	T	F	F	F	F	T	F	F
25	36471291	36482523	1.32	2.27	4.83	4.73e-09	2.31e-08	9.45e-05	TFR2	ENSBTAG00000011738	1	57.9	protein_coding	T	F	F	F	F	F	F	T	T
25	365646	374631	22.83	2.28	4.86	0	0	0	TMEM8A	ENSBTAG00000016588	-1	63.74	protein_coding	T	T	F	F	F	F	F	T	T
25	36624993	36628181	1.61	2.67	6.38	9.4e-07	3.76e-06	0.02	C25H7orf61	ENSBTAG00000016765	1	50.2	protein_coding	T	T	F	F	T	F	T	T	T
25	36771162	36776599	1.18	2.83	7.13	3.06e-08	1.39e-07	0.000612	GPC2	ENSBTAG00000008869	1	57.37	protein_coding	T	T	F	T	T	F	T	T	T
25	37902689	37918783	0.41	4.54	23.21	6.56e-08	2.89e-07	0.00131	TMEM130	ENSBTAG00000005679	1	53.97	protein_coding	F	F	F	F	F	F	T	T	T
25	39515688	39526238	10.56	8.03	260.84	0	0	0	SLC29A4	ENSBTAG00000007772	-1	60.69	protein_coding	T	F	F	F	F	F	F	F	F
25	39684040	39733711	0.93	4.38	20.86	0	0	0	RADIL	ENSBTAG00000030690	1	57.64	protein_coding	T	F	F	F	F	F	F	F	F
25	41349162	41350363	10.78	4.53	23.12	0	0	0	GRIFIN	ENSBTAG00000020896	1	68.3	protein_coding	T	T	F	F	F	F	T	F	F
25	42272935	42282988	2.97	2.08	4.24	7.9e-12	4.7e-11	1.58e-07	GPR146	ENSBTAG00000046014	-1	64.69	protein_coding	F	T	F	T	F	F	F	T	F
25	569058	605515	0.7	2.13	4.39	5.23e-07	2.14e-06	0.01	FBXL16	ENSBTAG00000019008	-1	64.29	protein_coding	T	T	F	F	T	F	F	T	T
25	613234	615345	56.05	2.22	4.65	0	0	0	METRN	ENSBTAG00000020198	1	68.75	protein_coding	T	T	F	F	F	F	F	F	T
25	620322	623768	6.48	2.68	6.39	0	0	0	CCDC78	ENSBTAG00000002470	-1	63.36	protein_coding	T	T	F	F	F	F	F	F	T
25	653105	660655	0.59	4.04	16.42	3.92e-09	1.93e-08	7.84e-05	MSLNL	ENSBTAG00000033580	-1	63.82	protein_coding	F	F	F	F	F	F	F	F	F
25	7647412	7689263	3.17	2.31	4.97	0	0	0	ABAT	ENSBTAG00000004038	1	48.37	protein_coding	F	F	F	F	F	F	T	T	T
25	959758	984950	0.98	2.33	5.01	2.91e-10	1.56e-09	5.82e-06	CACNA1H	ENSBTAG00000026461	1	64.33	protein_coding	T	F	F	F	F	F	F	F	F
26	18782564	18787376	2.61	3.52	11.47	0	0	0	SFRP5	ENSBTAG00000018566	-1	58.7	protein_coding	F	F	F	F	F	F	F	F	F
26	18869719	19013761	24.35	3.24	9.42	0	0	0	CRTAC1	ENSBTAG00000008102	-1	48.67	protein_coding	F	F	F	F	F	F	T	T	T
26	22422214	22440709	0.85	8.01	256.98	1.26e-13	8.46e-13	2.52e-09	KCNIP2	ENSBTAG00000016343	-1	51.91	protein_coding	F	T	F	F	F	F	T	T	T
26	22742695	22745622	0.64	6.69	103.58	8.03e-07	3.23e-06	0.02	ELOVL3	ENSBTAG00000015700	1	49.8	protein_coding	T	T	F	F	F	F	T	T	F
26	22745904	22757812	1.9	2.24	4.74	3.67e-11	2.07e-10	7.32e-07	PITX3	ENSBTAG00000015702	-1	53.41	protein_coding	T	T	F	F	F	F	T	T	T
26	22898556	22904894	9.51	2.83	7.11	0	0	0	gene:ENSBTAG00000003580	ENSBTAG00000003580	-1	60.12	protein_coding	T	F	F	F	F	F	F	F	F
26	23694362	23700404	5.46	3.85	14.46	0	0	0	CYP17A1	ENSBTAG00000014335	-1	53.47	protein_coding	F	F	F	F	F	F	T	T	F
26	24131990	24144138	33.22	2.82	7.08	0	0	0	INA	ENSBTAG00000002717	1	44.67	protein_coding	T	F	F	F	F	F	T	T	T
26	24303869	24309613	1.32	3.51	11.42	6.22e-08	2.74e-07	0.00124	CALHM3	ENSBTAG00000032761	-1	53.46	protein_coding	T	F	F	F	F	F	T	T	F
26	25893499	25904421	4.24	3.86	14.55	2.48e-14	1.74e-13	4.95e-10	CALY	ENSBTAG00000000791	1	58.86	protein_coding	T	T	F	F	F	F	F	T	F
26	34339430	34414796	0.3	3.8	13.88	3.44e-10	1.83e-09	6.87e-06	NRAP	ENSBTAG00000019327	-1	45.99	protein_coding	F	T	T	F	F	F	T	F	F
26	42782329	42813472	1.29	2.91	7.52	0	0	0	gene:ENSBTAG00000022715	ENSBTAG00000022715	1	52.21	protein_coding	F	F	F	F	T	F	T	T	T
26	50793561	50837647	0.15	6.67	101.87	4.72e-07	1.94e-06	0.00943	KNDC1	ENSBTAG00000011092	-1	59.33	protein_coding	F	F	F	F	F	F	F	F	F
26	51520775	51535696	0.7	5.24	37.88	4.07e-12	2.47e-11	8.14e-08	DPYSL4	ENSBTAG00000017780	1	65.05	protein_coding	T	F	F	F	F	F	F	F	F
26	51657461	51674652	3.51	2.1	4.29	2.22e-15	1.66e-14	4.44e-11	PWWP2B	ENSBTAG00000019519	1	65.48	protein_coding	T	T	F	F	F	F	F	F	T
27	18574170	18698056	2.78	2.69	6.46	0	0	0	MTUS1	ENSBTAG00000039682	1	42.23	protein_coding	T	F	F	F	F	F	T	T	F
27	28963365	28969954	5.78	3.25	9.53	0	0	0	DUSP26	ENSBTAG00000016413	-1	56.84	protein_coding	F	F	F	F	T	F	T	T	T
27	32912525	32915668	0.59	4.68	25.69	2.77e-09	1.38e-08	5.54e-05	ADRB3	ENSBTAG00000017981	-1	63.7	protein_coding	T	F	F	F	F	F	F	F	F
27	33900715	34069888	0.86	2.42	5.36	4e-07	1.65e-06	0.00799	ADAM32	ENSBTAG00000023146	1	37.55	protein_coding	F	F	F	F	F	F	T	T	F
27	35900362	35943920	0.69	4.2	18.39	3.92e-13	2.54e-12	7.82e-09	SFRP1	ENSBTAG00000027625	-1	51.75	protein_coding	F	T	F	F	T	F	F	F	F
27	4898754	4899642	10.18	2.29	4.88	2.95e-07	1.23e-06	0.0059	defb300	ENSBTAG00000045626	-1	45.56	protein_coding	F	F	F	F	F	F	F	F	F
27	6625352	6673110	1.72	4.25	18.97	0	0	0	WDR17	ENSBTAG00000014135	1	38.75	protein_coding	T	F	F	F	F	F	F	F	F
28	13562993	13615888	6.23	5.26	38.38	0	0	0	RET	ENSBTAG00000000570	1	55.79	protein_coding	T	F	F	F	T	F	T	T	F
28	28304694	28329730	3.53	4.91	30.08	0	0	0	SPOCK2	ENSBTAG00000008827	-1	55.29	protein_coding	F	T	F	F	T	F	T	T	T
28	35366025	35378318	1.86	2.58	5.99	1.73e-08	8.01e-08	0.000345	PLAC9	ENSBTAG00000020939	-1	50.25	protein_coding	T	T	F	F	T	F	T	T	F
28	41921827	41924801	3.64	4.61	24.48	5.16e-14	3.56e-13	1.03e-09	gene:ENSBTAG00000017946	ENSBTAG00000017946	1	50.79	protein_coding	F	T	F	F	T	F	T	F	T
28	44729723	44776997	0.38	7.11	138.13	1.22e-09	6.25e-09	2.44e-05	ALOX5	ENSBTAG00000020319	-1	50.34	protein_coding	F	F	F	F	F	F	T	F	F
28	8340143	8408741	0.5	2.76	6.78	5.04e-09	2.46e-08	0.000101	GNG4	ENSBTAG00000002908	-1	46.2	protein_coding	F	F	F	F	F	F	T	T	F
28	8733209	8829937	5.73	3.14	8.8	0	0	0	NID1	ENSBTAG00000007244	-1	44.66	protein_coding	T	F	F	F	F	F	F	F	F
29	12105147	12324134	0.89	4.71	26.11	8.05e-10	4.16e-09	1.61e-05	gene:ENSBTAG00000027868	ENSBTAG00000027868	1	41.2	protein_coding	F	T	F	F	T	F	T	T	T
29	26321510	26322752	38.91	2.03	4.09	0	0	0	TMEM86A	ENSBTAG00000048059	-1	56.15	protein_coding	F	F	F	F	F	F	T	T	T
29	27194434	27221901	17.59	2.83	7.12	0	0	0	VWA5A	ENSBTAG00000021215	1	40.4	protein_coding	T	F	F	F	F	F	F	F	F
29	28601863	28610589	2.7	9.45	697.4	0	0	0	ESAM	ENSBTAG00000001004	-1	55.15	protein_coding	T	F	F	F	F	F	T	T	F
29	36933306	36971367	1.29	2.42	5.34	5.96e-12	3.57e-11	1.19e-07	ST14	ENSBTAG00000019712	1	52.09	protein_coding	T	T	F	F	F	F	F	T	T
29	41045232	41082248	2.67	2.19	4.57	0	0	0	FADS2	ENSBTAG00000015505	1	52.47	protein_coding	F	F	F	F	T	F	T	T	T
29	41112115	41130629	1.81	3.12	8.7	0	0	0	RAB3IL1	ENSBTAG00000015745	-1	59.42	protein_coding	F	F	F	F	T	F	T	F	T
29	41655047	41657047	28.44	3.02	8.11	0	0	0	ROM1	ENSBTAG00000001188	1	59.12	protein_coding	F	T	F	F	F	F	T	T	T
29	41710701	41713352	113.16	2.07	4.19	0	0	0	LRRN4CL	ENSBTAG00000010484	-1	57.69	protein_coding	F	T	F	F	F	F	T	T	T
29	43126404	43142481	1.19	3.21	9.28	6.88e-08	3.02e-07	0.00137	gene:ENSBTAG00000045862	ENSBTAG00000045862	1	52.25	protein_coding	F	T	F	T	T	F	F	T	T
29	43152060	43154681	1.46	2.82	7.06	1.49e-08	6.95e-08	0.000298	gene:ENSBTAG00000016551	ENSBTAG00000016551	-1	62.2	protein_coding	F	T	F	F	T	F	F	T	T
29	43250522	43265507	2.82	3.06	8.33	0	0	0	CCDC88B	ENSBTAG00000040190	1	62.58	protein_coding	T	T	F	F	T	F	T	T	F
29	43590193	43602499	6.38	6.04	65.75	0	0	0	RASGRP2	ENSBTAG00000001029	-1	53.49	protein_coding	T	T	F	F	F	F	T	F	F
29	43606012	43617848	1.2	3.17	9.01	1.09e-13	7.37e-13	2.19e-09	PYGM	ENSBTAG00000001032	-1	55.56	protein_coding	T	T	F	F	F	F	T	T	T
29	44766936	44768173	135.09	3.72	13.21	0	0	0	gene:ENSBTAG00000014718	ENSBTAG00000014718	1	64.53	protein_coding	T	T	F	F	F	F	T	T	T
29	44770865	44771529	265.08	3.39	10.47	0	0	0	gene:ENSBTAG00000046587	ENSBTAG00000046587	-1	61.05	protein_coding	T	T	F	F	F	F	T	T	T
29	44790176	44800852	4.4	3.55	11.69	0	0	0	GAL3ST3	ENSBTAG00000002772	-1	54.8	protein_coding	T	T	F	F	F	F	F	T	F
29	44993275	44994609	16.88	3.93	15.19	0	0	0	TMEM151A	ENSBTAG00000020203	1	72.66	protein_coding	T	T	F	F	F	F	F	F	T
29	45016284	45018614	46.65	2.98	7.88	0	0	0	CD248	ENSBTAG00000044073	-1	67.65	protein_coding	F	T	F	T	F	F	T	T	T
29	45153624	45162953	1.85	2.86	7.28	4.2e-10	2.22e-09	8.39e-06	PELI3	ENSBTAG00000021097	1	55.66	protein_coding	T	F	F	F	F	F	T	T	T
29	45230682	45242282	30.01	2.1	4.29	0	0	0	ACTN3	ENSBTAG00000022244	1	59.48	protein_coding	F	F	F	F	F	F	T	F	T
29	45942347	45947879	2.24	3.66	12.65	0	0	0	TBC1D10C	ENSBTAG00000013133	1	62.95	protein_coding	F	F	F	F	F	F	F	T	F
29	45957524	45964322	7.83	2.4	5.28	0	0	0	CARNS1	ENSBTAG00000017690	1	63.88	protein_coding	F	F	F	F	F	F	F	F	F
29	46114978	46119340	2.11	3.36	10.28	1.03e-12	6.52e-12	2.05e-08	DOC2G	ENSBTAG00000021777	-1	66.98	protein_coding	T	F	F	F	F	F	T	T	F
29	46143363	46150095	1.73	4.49	22.48	2.22e-16	1.75e-15	4.44e-12	ALDH3B2	ENSBTAG00000012054	-1	63.06	protein_coding	T	F	F	F	F	F	F	F	F
29	47591667	47595475	4.71	2.21	4.64	1.02e-08	4.83e-08	0.000203	FGF19	ENSBTAG00000017285	-1	53.16	protein_coding	F	F	F	F	F	F	T	F	F
29	49368787	49370785	8.48	2.5	5.66	0	0	0	CDKN1C	ENSBTAG00000031184	1	71.74	protein_coding	T	T	F	F	F	F	F	F	F
29	50710076	50739409	3.99	2.4	5.27	3.05e-14	2.13e-13	6.1e-10	CRACR2B	ENSBTAG00000017805	-1	53.24	protein_coding	F	F	F	F	T	F	F	F	F
29	50840061	50843011	45.72	3.42	10.7	0	0	0	CEND1	ENSBTAG00000001228	1	65.67	protein_coding	T	F	F	F	F	F	F	T	F
29	51291089	51345808	1.1	3.1	8.57	0	0	0	B4GALNT4	ENSBTAG00000024814	-1	58.18	protein_coding	T	T	F	F	T	F	T	T	F
3	100498107	100503197	14.78	4.31	19.78	0	0	0	TSPAN1	ENSBTAG00000013320	-1	53.19	protein_coding	T	T	F	F	F	F	T	T	F
3	102655361	102659082	3.55	2.63	6.19	1.11e-16	8.86e-16	2.22e-12	CCDC24	ENSBTAG00000011888	-1	59.24	protein_coding	F	T	F	T	T	F	T	T	F
3	106154951	106169324	2.17	5.49	44.89	1.07e-14	7.66e-14	2.13e-10	RIMS3	ENSBTAG00000018726	1	50.5	protein_coding	F	F	F	F	F	F	F	T	F
3	106396860	106410914	0.83	3.27	9.63	6.32e-08	2.78e-07	0.00126	COL9A2	ENSBTAG00000020622	1	56.88	protein_coding	F	F	F	F	F	F	F	T	F
3	10652468	10683411	0.72	7.36	164.01	1.55e-11	9.02e-11	3.1e-07	CADM3	ENSBTAG00000003217	-1	47.6	protein_coding	F	F	F	F	F	F	T	T	F
3	106976317	106988248	4.07	5.47	44.35	0	0	0	HPCAL4	ENSBTAG00000014538	1	51.58	protein_coding	T	F	F	F	F	F	F	F	F
3	10821598	10858863	2.18	2.55	5.85	1.77e-11	1.02e-10	3.53e-07	gene:ENSBTAG00000011511	ENSBTAG00000011511	1	38.85	protein_coding	F	T	F	F	F	F	T	T	T
3	110299484	110302198	4.95	3.17	9.02	0	0	0	COL8A2	ENSBTAG00000010175	1	68.07	protein_coding	T	T	F	F	F	F	F	T	F
3	111380891	111419564	0.44	3.33	10.08	2.02e-07	8.59e-07	0.00405	DLGAP3	ENSBTAG00000013867	1	48.63	protein_coding	T	F	F	F	F	F	T	F	F
3	117409071	117482330	0.12	4.75	26.97	8.75e-09	4.17e-08	0.000175	COL6A3	ENSBTAG00000030190	-1	48.02	protein_coding	F	F	F	F	F	F	T	T	F
3	118182616	118184696	2.19	3.47	11.07	9.21e-13	5.86e-12	1.84e-08	HES6	ENSBTAG00000009870	-1	69.2	protein_coding	F	F	F	F	F	F	F	F	F
3	120502458	120608549	5.19	6.45	87.52	0	0	0	KIF1A	ENSBTAG00000011538	-1	61.11	protein_coding	T	F	F	F	F	F	F	F	F
3	120761890	120806556	0.69	6.14	70.59	0	0	0	SNED1	ENSBTAG00000014132	1	57.86	protein_coding	T	T	F	F	F	F	F	T	F
3	13973123	13985544	2.39	3.3	9.88	0	0	0	LRRC71	ENSBTAG00000012348	-1	55.33	protein_coding	F	F	T	T	T	F	F	F	F
3	14019444	14037555	1.67	5.59	48.31	0	0	0	NTRK1	ENSBTAG00000003060	-1	55.75	protein_coding	T	F	F	F	T	F	F	F	F
3	14039800	14055462	2.11	7.52	183.7	0	0	0	INSRR	ENSBTAG00000003054	1	55.95	protein_coding	T	F	F	F	F	F	F	F	F
3	14223569	14241533	1.69	4.14	17.63	0	0	0	BCAN	ENSBTAG00000015789	-1	55.92	protein_coding	T	F	T	F	F	F	T	T	F
3	14254486	14259736	0.59	6.98	126.58	8.93e-08	3.89e-07	0.00178	HAPLN2	ENSBTAG00000015784	-1	56.07	protein_coding	T	F	F	F	F	F	T	F	F
3	14659269	14679216	4.27	2.68	6.39	0	0	0	SEMA4A	ENSBTAG00000012228	-1	49	protein_coding	F	T	F	F	F	F	F	T	T
3	14926783	14946170	18.54	2.05	4.13	0	0	0	SYT11	ENSBTAG00000011209	-1	45.98	protein_coding	F	F	F	F	T	F	T	T	T
3	15399755	15408994	1.48	2.28	4.87	1.94e-10	1.05e-09	3.87e-06	PKLR	ENSBTAG00000017056	1	52.67	protein_coding	T	T	F	F	F	F	T	T	T
3	15488474	15498217	2.4	2.47	5.55	1.59e-12	9.96e-12	3.18e-08	TRIM46	ENSBTAG00000010622	-1	59.3	protein_coding	F	F	F	F	T	F	T	T	T
3	15567318	15576042	3.49	4.7	25.99	0	0	0	EFNA3	ENSBTAG00000033423	-1	61.35	protein_coding	T	T	F	F	F	F	T	T	F
3	15587570	15591685	11.35	2.16	4.48	0	0	0	EFNA4	ENSBTAG00000010673	-1	57.43	protein_coding	T	T	F	F	F	F	F	T	F
3	16679030	16683525	2.07	2.09	4.26	2.63e-10	1.41e-09	5.26e-06	SLC27A3	ENSBTAG00000021862	-1	62.81	protein_coding	F	F	F	F	F	F	T	T	F
3	16747641	16761172	1.75	3.09	8.53	0	0	0	NPR1	ENSBTAG00000006234	-1	56.32	protein_coding	T	F	F	F	F	F	T	T	T
3	16812602	16816588	9.36	5.25	38.01	0	0	0	S100A1	ENSBTAG00000005163	-1	54.6	protein_coding	F	T	T	F	F	F	F	T	T
3	16827337	16829392	280.46	2.45	5.45	0	0	0	S100A14	ENSBTAG00000021377	1	58.51	protein_coding	F	T	T	F	T	F	T	T	T
3	16891318	16894701	43.3	3.68	12.81	0	0	0	S100A5	ENSBTAG00000000644	1	56.91	protein_coding	F	T	F	T	T	F	T	T	T
3	18991963	19015891	0.52	4.29	19.51	1.14e-06	4.52e-06	0.02	RORC	ENSBTAG00000017405	1	55.33	protein_coding	T	F	F	F	F	F	F	F	F
3	19090895	19098231	18.03	2.44	5.42	0	0	0	RIIAD1	ENSBTAG00000032733	-1	49.49	protein_coding	F	F	F	F	F	F	F	F	F
3	19717720	19728131	1.42	2.61	6.12	1.05e-14	7.59e-14	2.11e-10	SEMA6C	ENSBTAG00000007281	1	57.53	protein_coding	T	T	F	F	F	F	T	T	T
3	19818789	19828310	0.78	7.35	163.46	5.36e-11	3e-10	1.07e-06	ANXA9	ENSBTAG00000015304	-1	49.95	protein_coding	F	T	F	F	T	F	T	T	T
3	20228528	20233933	61.71	2.42	5.34	0	0	0	ECM1	ENSBTAG00000003806	-1	56.73	protein_coding	F	T	F	F	T	F	F	T	F
3	20406684	20413546	7.24	4.87	29.25	0	0	0	C3H1orf54	ENSBTAG00000021485	-1	44.95	protein_coding	T	T	T	F	T	F	T	F	F
3	20746037	20755994	2.84	5.8	55.87	0	0	0	SV2A	ENSBTAG00000001599	1	52.57	protein_coding	T	F	F	F	T	F	T	F	T
3	21489097	21493251	94.38	2.19	4.56	0	0	0	TXNIP	ENSBTAG00000020060	1	43.3	protein_coding	F	T	T	T	T	F	T	T	T
3	21588494	21605094	0.39	3.39	10.51	3.61e-07	1.5e-06	0.00722	ANKRD35	ENSBTAG00000038844	1	49.05	protein_coding	T	F	F	F	F	F	T	T	T
3	27658862	27729416	1.02	3.32	9.96	2.01e-12	1.25e-11	4.01e-08	CASQ2	ENSBTAG00000011500	1	44.75	protein_coding	F	T	F	F	F	F	T	T	T
3	30761233	30766807	13.49	3.8	13.9	0	0	0	PPM1J	ENSBTAG00000006081	1	56.39	protein_coding	T	F	F	F	F	F	F	T	F
3	33768050	33770824	46.67	2.62	6.16	0	0	0	GSTM3	ENSBTAG00000001842	1	46.81	protein_coding	T	F	F	F	F	F	F	F	F
3	34313872	34353121	0.44	3.56	11.78	1.63e-07	6.96e-07	0.00325	KIAA1324	ENSBTAG00000001136	-1	46.17	protein_coding	F	T	F	F	F	F	T	T	T
3	42184097	42188752	0.26	6.78	109.65	9.78e-08	4.25e-07	0.00195	S1PR1	ENSBTAG00000005990	-1	48.75	protein_coding	T	F	F	F	F	F	F	F	F
3	48796264	48882623	12.66	3.02	8.1	0	0	0	SLC44A3	ENSBTAG00000020344	-1	43.62	protein_coding	F	F	F	F	T	F	T	T	T
3	59252316	59280289	0.35	6.56	94.12	1.06e-06	4.19e-06	0.02	MCOLN3	ENSBTAG00000016982	1	38.94	protein_coding	T	F	F	F	F	F	F	F	F
3	83834791	83876648	0.37	3.95	15.5	1.15e-06	4.54e-06	0.02	KANK4	ENSBTAG00000014382	1	46.69	protein_coding	T	F	F	F	F	F	T	T	T
3	86609666	86640839	8.94	3.95	15.49	0	0	0	gene:ENSBTAG00000010033	ENSBTAG00000010033	1	40.84	protein_coding	T	T	F	F	T	F	F	T	T
3	86788072	87273175	20.51	3	8.02	0	0	0	FGGY	ENSBTAG00000030669	-1	42.03	protein_coding	F	T	T	F	T	F	T	T	T
3	92059023	92083335	8.58	2.06	4.16	0	0	0	TTC22	ENSBTAG00000017132	1	53.11	protein_coding	F	T	F	F	T	F	T	F	T
3	94917406	94985342	2.28	4.04	16.41	8.33e-15	6.03e-14	1.66e-10	RAB3B	ENSBTAG00000005337	1	43.68	protein_coding	F	F	F	F	F	F	T	F	T
3	9591852	9601502	2.1	3.03	8.18	7.77e-16	5.94e-15	1.55e-11	CASQ1	ENSBTAG00000020223	-1	52.82	protein_coding	F	T	T	T	F	F	F	T	F
3	9695129	9702141	38.31	2.66	6.34	0	0	0	IGSF8	ENSBTAG00000009982	1	60.99	protein_coding	T	T	F	F	F	F	T	T	T
3	9720672	9755813	0.88	4.87	29.15	0	0	0	KCNJ10	ENSBTAG00000002414	1	49.24	protein_coding	T	F	F	F	F	F	F	F	F
3	98567049	98587443	0.41	6.88	117.4	3.15e-08	1.43e-07	0.00063	SLC5A9	ENSBTAG00000014225	-1	52.93	protein_coding	F	F	F	F	F	F	T	T	F
3	9859945	9877224	7.35	2.1	4.29	0	0	0	IGSF9	ENSBTAG00000001481	1	56.54	protein_coding	F	F	T	F	T	F	T	T	T
4	106989816	106993917	1.13	3.89	14.79	7.98e-13	5.1e-12	1.59e-08	EPHB6	ENSBTAG00000015510	1	63.36	protein_coding	F	F	F	F	F	F	F	F	F
4	107489913	107492602	12.69	2.01	4.02	0	0	0	TMEM139	ENSBTAG00000018158	1	52.71	protein_coding	F	T	F	F	F	F	T	T	F
4	107608325	107623775	7.36	2.1	4.28	0	0	0	EPHA1	ENSBTAG00000006359	-1	54.6	protein_coding	F	T	F	F	T	F	T	T	T
4	113437377	113490743	0.08	7.49	179.5	1.98e-12	1.23e-11	3.96e-08	SSPO	ENSBTAG00000008542	1	62.83	protein_coding	T	F	F	F	F	F	T	T	F
4	113564407	113567496	14.17	3.07	8.42	0	0	0	RARRES2	ENSBTAG00000004215	-1	63.45	protein_coding	F	F	F	F	F	F	T	F	F
4	113866800	113874303	3.39	2.5	5.66	4.44e-16	3.44e-15	8.87e-12	GIMAP4	ENSBTAG00000046257	-1	44.51	protein_coding	F	F	F	F	F	F	F	F	F
4	114199462	114207377	1.7	5.53	46.06	8.88e-15	6.42e-14	1.77e-10	TMEM176B	ENSBTAG00000016766	-1	51.19	protein_coding	F	F	F	F	F	F	F	F	F
4	114208682	114212312	2.14	5.62	49.07	5e-15	3.66e-14	9.98e-11	TMEM176A	ENSBTAG00000012078	1	59.6	protein_coding	F	F	F	F	F	F	F	F	F
4	114325568	114357974	0.71	8.4	337.93	0	0	0	KCNH2	ENSBTAG00000004078	-1	60.41	protein_coding	T	F	F	F	F	F	T	T	F
4	114394496	114401832	1.5	2.69	6.46	9.27e-12	5.49e-11	1.85e-07	ATG9B	ENSBTAG00000012031	-1	62.19	protein_coding	T	F	F	F	F	F	F	T	F
4	114730382	114755250	0.78	7.21	148.29	5.3e-08	2.35e-07	0.00106	WDR86	ENSBTAG00000006232	-1	57.47	protein_coding	T	F	F	F	F	F	F	F	F
4	11840470	11911742	28.09	2.88	7.35	0	0	0	SGCE	ENSBTAG00000021282	-1	37.55	protein_coding	F	F	F	F	F	F	T	T	T
4	20153135	20233615	3.86	2.8	6.97	0	0	0	SCIN	ENSBTAG00000009786	1	39.22	protein_coding	T	F	F	F	F	F	T	T	T
4	24927683	24931927	52.38	2.1	4.28	0	0	0	SOSTDC1	ENSBTAG00000005377	-1	36.82	protein_coding	F	T	F	F	T	F	T	T	T
4	57586911	57589037	0.65	4.08	16.87	9.12e-09	4.35e-08	0.000182	LRRN3	ENSBTAG00000004399	-1	40.95	protein_coding	F	F	F	F	F	F	T	F	F
4	65793129	65809031	0.25	6.39	83.77	1.27e-06	4.99e-06	0.03	GHRHR	ENSBTAG00000047599	-1	52.31	protein_coding	F	T	F	F	T	F	F	F	F
4	65830992	65845186	80.64	4.77	27.22	0	0	0	AQP1	ENSBTAG00000000745	-1	54.84	protein_coding	T	F	F	F	T	F	F	F	F
4	66062161	66090181	1.61	4.83	28.37	0	0	0	CRHR2	ENSBTAG00000014381	1	53.66	protein_coding	F	F	F	F	F	F	T	T	T
4	70049646	70117257	12.14	3.01	8.06	0	0	0	SNX10	ENSBTAG00000001822	-1	41.81	protein_coding	T	F	F	F	F	F	T	T	T
4	70211380	70246094	3.22	4.23	18.81	0	0	0	NFE2L3	ENSBTAG00000004136	-1	43.87	protein_coding	F	F	F	F	F	F	T	T	T
4	7096630	7487703	0.21	3.05	8.26	3.42e-10	1.82e-09	6.83e-06	ABCA13	ENSBTAG00000003531	-1	44.44	protein_coding	F	F	F	F	F	F	T	T	F
4	7612875	7652099	3.15	3.33	10.08	1.11e-16	8.86e-16	2.22e-12	SUN3	ENSBTAG00000008155	1	43.25	protein_coding	F	T	F	F	F	F	T	T	T
4	76705105	76712709	59.26	2.39	5.23	0	0	0	IGFBP3	ENSBTAG00000003994	1	50.45	protein_coding	T	F	F	F	F	F	T	F	F
4	77239819	77248648	1.72	2.34	5.05	0	0	0	gene:ENSBTAG00000008093	ENSBTAG00000008093	1	62.5	protein_coding	T	T	F	F	F	F	F	T	F
4	78221619	78492463	0.89	3.64	12.46	0	0	0	HECW1	ENSBTAG00000021216	-1	41.69	protein_coding	F	F	F	F	F	F	T	T	T
4	88746219	88755270	0.31	6.48	88.95	1.35e-06	5.31e-06	0.03	LMOD2	ENSBTAG00000002157	1	45.38	protein_coding	T	F	F	F	F	F	F	F	F
4	93655277	93685724	0.43	2.52	5.72	8.09e-08	3.54e-07	0.00162	KCP	ENSBTAG00000003449	-1	56.18	protein_coding	T	T	F	F	F	F	F	F	F
4	99767237	99786672	1.43	8.09	272.32	1.11e-16	8.86e-16	2.22e-12	STRA8	ENSBTAG00000001346	1	49.94	protein_coding	T	F	F	F	F	F	F	F	F
5	100479659	100484421	4.42	4.47	22.13	3.09e-10	1.65e-09	6.18e-06	CLEC2A	ENSBTAG00000046742	1	34.54	protein_coding	F	F	F	F	F	F	T	F	F
5	101298127	101346611	28.98	2.75	6.71	0	0	0	A2M	ENSBTAG00000018137	1	39.75	protein_coding	F	F	F	F	F	F	T	T	T
5	101871073	101876226	3.8	2.94	7.7	0	0	0	NANOG	ENSBTAG00000020916	1	39.79	protein_coding	F	F	F	F	F	F	T	T	T
5	103581388	103611327	11.65	7.58	191.8	0	0	0	CLSTN3	ENSBTAG00000008129	-1	53.22	protein_coding	F	T	F	F	F	F	F	F	F
5	103737161	103747996	1.17	2.37	5.17	7.05e-07	2.85e-06	0.01	C1R	ENSBTAG00000008612	1	51.76	protein_coding	F	F	F	F	F	F	T	T	F
5	103768066	103779250	12.7	3.33	10.09	0	0	0	C1S	ENSBTAG00000004840	-1	45.72	protein_coding	F	F	F	F	F	F	F	T	F
5	103899878	103906801	17.59	2.54	5.82	0	0	0	ENO2	ENSBTAG00000011274	-1	54.85	protein_coding	T	T	T	T	F	F	T	F	F
5	103987752	103993598	0.38	7.03	130.32	1.21e-08	5.7e-08	0.000242	GPR162	ENSBTAG00000034385	-1	60.83	protein_coding	T	T	F	F	F	F	F	F	F
5	104029019	104036158	0.91	4.35	20.45	8.08e-12	4.8e-11	1.61e-07	LAG3	ENSBTAG00000034295	-1	56.03	protein_coding	F	T	F	F	F	F	T	T	T
5	104114216	104117626	3.47	4.63	24.73	0	0	0	PIANP	ENSBTAG00000001099	1	59.75	protein_coding	T	F	F	F	F	F	T	T	F
5	104154010	104161646	8.42	2.33	5.03	0	0	0	ACRBP	ENSBTAG00000034246	1	56.49	protein_coding	T	T	T	F	F	F	T	T	T
5	104603432	104727301	2.89	2.98	7.87	0	0	0	VWF	ENSBTAG00000012265	1	51.4	protein_coding	F	T	F	T	T	F	T	T	T
5	105762455	105764041	0.55	4.29	19.52	1.03e-06	4.1e-06	0.02	KCNA6	ENSBTAG00000047191	-1	64.21	protein_coding	F	F	F	F	F	F	F	F	F
5	109876442	109894993	6.06	4.04	16.48	0	0	0	TUBA8	ENSBTAG00000018530	1	53.74	protein_coding	T	F	F	F	T	F	T	T	F
5	110122673	110124878	42.88	2.67	6.35	0	0	0	H1F0	ENSBTAG00000038439	1	51.41	protein_coding	T	F	F	F	F	F	T	T	F
5	111293866	111317963	55.77	2.4	5.28	0	0	0	SYNGR1	ENSBTAG00000005765	1	55.4	protein_coding	T	T	F	F	F	F	F	F	F
5	113160819	113174721	14.43	2.07	4.2	0	0	0	CSDC2	ENSBTAG00000004004	1	56.25	protein_coding	F	F	F	F	T	F	T	F	T
5	113489031	113508640	2.22	6.89	118.37	0	0	0	2019-09-03	ENSBTAG00000013173	1	51.57	protein_coding	F	F	F	F	F	F	F	F	F
5	113609076	113613623	0.88	5.87	58.49	6.53e-12	3.91e-11	1.3e-07	gene:ENSBTAG00000026502	ENSBTAG00000026502	-1	62.22	protein_coding	T	F	F	F	F	F	F	F	T
5	113843751	113862537	1.11	7.36	163.71	1.02e-10	5.63e-10	2.05e-06	NFAM1	ENSBTAG00000005018	-1	55.33	protein_coding	T	T	F	T	F	F	T	F	F
5	114644629	114767260	1.14	9	513.7	0	0	0	SCUBE1	ENSBTAG00000011275	-1	58.14	protein_coding	T	F	F	F	F	F	F	T	T
5	115084016	115117266	1.68	2.68	6.41	2.01e-14	1.42e-13	4.02e-10	SULT4A1	ENSBTAG00000006273	1	56.12	protein_coding	T	F	F	F	F	F	T	F	F
5	115517820	115572329	2.22	2.94	7.69	2.07e-09	1.04e-08	4.13e-05	PARVB	ENSBTAG00000021978	1	55.54	protein_coding	F	F	F	F	F	F	F	F	F
5	116071377	116109883	5.85	3.35	10.17	0	0	0	gene:ENSBTAG00000008858	ENSBTAG00000008858	1	55.06	protein_coding	T	F	F	F	F	F	F	T	F
5	116413858	116422253	1.51	7.58	191.49	3.2e-12	1.96e-11	6.4e-08	UPK3A	ENSBTAG00000009913	1	56.13	protein_coding	F	F	F	F	T	F	T	T	F
5	119832293	119837101	3.51	3.35	10.21	2.22e-16	1.75e-15	4.44e-12	MAPK11	ENSBTAG00000030182	-1	67.37	protein_coding	T	T	F	F	F	F	F	F	F
5	120098392	120106718	0.8	2.43	5.38	3.35e-07	1.39e-06	0.00669	CPT1B	ENSBTAG00000016048	-1	61.47	protein_coding	T	F	F	F	F	F	T	F	T
5	120127056	120137203	3.61	3.61	12.18	0	0	0	MAPK8IP2	ENSBTAG00000030179	1	64.64	protein_coding	T	F	F	F	F	F	T	F	F
5	120152353	120155489	48.79	2.75	6.73	0	0	0	ARSA	ENSBTAG00000016053	-1	63.02	protein_coding	T	F	F	F	T	F	F	T	F
5	25627052	25631242	6.61	5.2	36.86	0	0	0	gene:ENSBTAG00000010907	ENSBTAG00000010907	1	54.62	protein_coding	T	F	F	F	F	F	F	F	F
5	25807926	25823618	5.29	2.27	4.82	0	0	0	ZNF385A	ENSBTAG00000015604	1	55.99	protein_coding	F	T	F	T	T	F	F	T	T
5	25929035	25936083	1.08	5.21	37.04	1.1e-11	6.45e-11	2.19e-07	NFE2	ENSBTAG00000001562	1	54.62	protein_coding	T	T	F	F	F	F	T	T	T
5	28576320	28615499	6.4	4.02	16.26	0	0	0	GALNT6	ENSBTAG00000017943	1	49.77	protein_coding	T	T	F	F	F	F	T	T	T
5	29981933	30005379	0.46	7.05	132.93	6.56e-09	3.17e-08	0.000131	ASIC1	ENSBTAG00000000970	-1	53.87	protein_coding	F	T	F	F	T	F	F	T	F
5	30444365	30463019	0.69	3.43	10.81	2.46e-10	1.32e-09	4.92e-06	KCNH3	ENSBTAG00000019277	-1	57.13	protein_coding	F	T	F	F	F	F	T	T	T
5	30688660	30692263	10.7	6.81	112.29	0	0	0	PRPH	ENSBTAG00000017864	-1	62.71	protein_coding	T	F	F	F	F	F	T	F	F
5	30894556	30899509	1.99	4.15	17.76	1.3e-13	8.72e-13	2.6e-09	DHH	ENSBTAG00000000124	1	58.74	protein_coding	T	T	F	F	F	F	F	F	T
5	31000183	31003266	0.58	6.59	96.48	1.47e-06	5.77e-06	0.03	WNT1	ENSBTAG00000015364	-1	62.09	protein_coding	T	F	F	F	F	F	T	F	T
5	32277008	32278883	4.28	2.07	4.19	0	0	0	CCDC184	ENSBTAG00000002390	-1	56.93	protein_coding	T	T	F	F	F	F	T	T	T
5	32667466	32676306	19.12	2.4	5.27	0	0	0	SLC48A1	ENSBTAG00000032331	-1	56.92	protein_coding	T	F	T	F	T	F	F	F	F
5	33619909	33654583	1.19	8.31	316.32	8.88e-16	6.78e-15	1.77e-11	SLC38A4	ENSBTAG00000014197	1	39.39	protein_coding	F	F	F	F	F	F	T	F	T
5	49606970	49682912	0.33	6.52	91.53	9.01e-07	3.61e-06	0.02	C12orf56	ENSBTAG00000018861	1	39.49	protein_coding	F	T	F	F	F	F	T	T	T
5	55986061	56002079	0.92	3.77	13.67	8.1e-12	4.81e-11	1.62e-07	AVIL	ENSBTAG00000016913	1	50.04	protein_coding	F	T	F	F	T	F	T	T	T
5	56179509	56186416	1.96	3.16	8.93	9.5e-13	6.04e-12	1.9e-08	B4GALNT1	ENSBTAG00000004494	1	57.77	protein_coding	T	F	F	F	F	F	F	F	T
5	56233023	56258780	1.78	5.23	37.46	0	0	0	KIF5A	ENSBTAG00000021336	-1	47.45	protein_coding	T	F	F	F	F	F	T	T	T
5	56321395	56331773	0.39	7.62	197.23	1.39e-12	8.74e-12	2.78e-08	GLI1	ENSBTAG00000006631	-1	55.79	protein_coding	T	T	F	F	F	F	T	T	T
5	56334244	56335809	1.68	5.62	49.24	1.11e-16	8.86e-16	2.22e-12	INHBE	ENSBTAG00000006599	-1	61.62	protein_coding	T	T	F	F	F	F	T	T	T
5	56537021	56539323	17.07	6.74	106.74	0	0	0	NDUFA4L2	ENSBTAG00000031503	1	61.14	protein_coding	T	F	F	F	F	F	T	T	T
5	56548139	56556988	4.3	5.75	53.88	0	0	0	NXPH4	ENSBTAG00000047650	-1	60.15	protein_coding	T	F	F	F	F	F	F	T	F
5	57539933	57560884	2.06	3.99	15.85	0	0	0	ERBB3	ENSBTAG00000010444	-1	49.6	protein_coding	F	F	F	F	F	F	T	T	T
5	57669835	57677941	11.09	2.57	5.93	0	0	0	PMEL	ENSBTAG00000004019	1	47.84	protein_coding	F	F	F	F	T	F	T	T	F
5	57758050	57762409	4.44	2.42	5.36	0	0	0	gene:ENSBTAG00000009049	ENSBTAG00000009049	-1	55.28	protein_coding	F	F	F	F	F	F	T	T	T
5	57874054	57898519	21.27	2.61	6.09	0	0	0	ITGA7	ENSBTAG00000012897	1	53.69	protein_coding	F	F	F	F	F	F	T	T	T
5	70013667	70054229	8.74	2.07	4.2	0	0	0	TCP11L2	ENSBTAG00000002127	1	42.98	protein_coding	F	T	F	F	F	F	T	T	T
5	71475847	71926718	2.41	6.04	65.64	0	0	0	SYN3	ENSBTAG00000020636	-1	45.35	protein_coding	F	T	T	F	T	F	T	T	T
5	75056435	75084280	8.89	5.03	32.62	0	0	0	APOL3_2	ENSBTAG00000000667	1	45.56	protein_coding	F	T	F	F	T	F	T	T	T
5	95605339	95670749	4.54	3.27	9.64	0	0	0	GUCY2C	ENSBTAG00000019722	1	42.5	protein_coding	F	F	F	F	F	F	T	T	T
5	95706361	95796211	12.18	3.03	8.14	0	0	0	PLBD1	ENSBTAG00000015562	1	41.5	protein_coding	F	F	T	F	F	F	T	T	T
5	97520910	97524789	0.59	3.04	8.22	1.05e-06	4.16e-06	0.02	APOLD1	ENSBTAG00000002362	-1	47.24	protein_coding	F	F	F	F	T	F	T	T	F
5	97612241	97635127	1.41	2.56	5.89	2.55e-08	1.16e-07	0.000509	GPR19	ENSBTAG00000011959	1	43.23	protein_coding	F	F	F	F	F	F	T	T	T
6	101195831	101270493	1.24	3.14	8.84	6.27e-07	2.54e-06	0.01	CDS1	ENSBTAG00000045787	1	40.67	protein_coding	F	T	F	F	T	F	T	F	F
6	102687307	103063481	0.52	5	31.98	4.21e-09	2.07e-08	8.42e-05	MAPK10	ENSBTAG00000020048	-1	39.38	protein_coding	F	F	F	F	F	F	T	T	T
6	105105248	105166798	1.1	8.67	407.73	0	0	0	CRMP1	ENSBTAG00000004292	1	47.7	protein_coding	F	F	F	F	F	F	F	T	T
6	106483716	107356158	13.36	3.08	8.47	0	0	0	NSG1	ENSBTAG00000005711	-1	56.87	protein_coding	T	T	F	F	T	F	T	F	T
6	107264722	107269190	3.03	2.44	5.43	2.34e-09	1.17e-08	4.68e-05	gene:ENSBTAG00000017335	ENSBTAG00000017335	1	67.8	protein_coding	F	T	F	F	T	F	F	F	T
6	108429350	108481941	0.69	4.1	17.18	1.15e-10	6.27e-10	2.29e-06	ZFYVE28	ENSBTAG00000006683	1	55.81	protein_coding	F	T	F	F	F	F	F	F	T
6	109224627	109228237	39.16	2.78	6.85	0	0	0	SPON2	ENSBTAG00000004261	-1	70.48	protein_coding	T	T	F	F	T	F	F	T	F
6	109691052	109704277	2.32	2.07	4.21	2.44e-10	1.31e-09	4.87e-06	FGFR3	ENSBTAG00000007164	1	67.74	protein_coding	T	T	F	F	T	F	F	F	F
6	109868827	109870154	63.73	2.6	6.07	0	0	0	C4orf48	ENSBTAG00000031395	-1	71.16	protein_coding	F	F	F	F	F	F	T	F	T
6	115687877	115716694	1.79	3.81	14.04	7.74e-11	4.28e-10	1.55e-06	BST1	ENSBTAG00000006156	1	46.03	protein_coding	T	T	F	F	T	F	T	F	F
6	115802869	115858942	1.05	2.39	5.23	3.68e-08	1.66e-07	0.000735	CD38	ENSBTAG00000013569	1	44.14	protein_coding	F	T	F	F	T	F	F	F	F
6	118880491	118928275	0.89	3	8.01	2.73e-09	1.36e-08	5.46e-05	SORCS2	ENSBTAG00000027434	1	57.93	protein_coding	F	F	F	F	F	F	F	F	F
6	119107715	119213224	1.74	4.45	21.8	0	0	0	ABLIM2	ENSBTAG00000015926	-1	58.1	protein_coding	F	T	F	F	F	F	F	T	F
6	24052979	24096194	15.46	2.28	4.87	0	0	0	gene:ENSBTAG00000015297	ENSBTAG00000015297	-1	37.7	protein_coding	F	F	F	F	F	F	T	T	F
6	38309555	38323305	0.78	6.82	112.68	1.55e-06	6.07e-06	0.03	IBSP	ENSBTAG00000000470	-1	36.43	protein_coding	F	F	F	F	F	F	F	F	F
6	45927554	45930819	3.89	4.02	16.24	0	0	0	SOD3	ENSBTAG00000013980	1	58.24	protein_coding	F	F	F	F	T	F	T	T	T
6	46791165	46881531	1.8	2.32	5.01	3.66e-15	2.71e-14	7.32e-11	SEL1L3	ENSBTAG00000002299	-1	43.46	protein_coding	F	T	F	F	F	F	T	F	F
6	68813854	68819847	0.59	5.56	47.17	8.52e-11	4.7e-10	1.7e-06	SLC10A4	ENSBTAG00000004888	1	43.24	protein_coding	F	F	F	F	F	F	F	T	T
6	73368358	73396166	0.25	4.46	21.99	1.56e-07	6.7e-07	0.00313	MGC148692	ENSBTAG00000040398	1	46.74	protein_coding	F	F	F	F	F	F	T	T	T
6	90559882	90563647	4.63	4.66	25.29	0	0	0	CXCL8	ENSBTAG00000019716	1	35.82	protein_coding	F	F	F	F	F	F	T	T	T
6	90695494	90697557	59.41	2.69	6.44	0	0	0	CXCL2	ENSBTAG00000027513	1	46.71	protein_coding	F	F	F	F	F	F	T	T	T
6	90811062	90813079	75.58	2.17	4.51	0	0	0	CXCL3	ENSBTAG00000037778	1	46.23	protein_coding	F	T	F	F	T	F	T	T	T
6	90822748	90824841	31.74	2.35	5.11	0	0	0	GRO1	ENSBTAG00000037558	1	45.22	protein_coding	F	F	T	F	T	F	T	T	T
6	91597122	91723390	9.66	2.06	4.18	0	0	0	PARM1	ENSBTAG00000015919	1	43.16	protein_coding	T	T	F	F	F	F	T	F	F
6	92975363	93058338	3.7	2.3	4.93	0	0	0	CCDC158	ENSBTAG00000012157	-1	38.6	protein_coding	F	F	F	F	F	F	T	T	T
7	12610668	12658973	0.9	3.91	15.07	0	0	0	ADGRL1	ENSBTAG00000003675	1	58.03	protein_coding	T	F	F	F	F	F	T	T	F
7	12717686	12720698	3.9	2.93	7.6	5.55e-16	4.28e-15	1.11e-11	C19orf67	ENSBTAG00000016937	1	55.59	protein_coding	T	T	F	F	F	F	T	T	T
7	12866049	12871072	9.2	3.38	10.42	0	0	0	PODNL1	ENSBTAG00000006073	1	62.6	protein_coding	F	T	F	F	T	F	T	T	T
7	13793341	13818154	2.94	2.28	4.86	0	0	0	MAST1	ENSBTAG00000006080	-1	52.5	protein_coding	T	T	F	F	F	F	T	T	F
7	1418471	1421386	18.33	7.94	246.16	0	0	0	LTC4S	ENSBTAG00000009737	-1	63.34	protein_coding	T	F	F	F	F	F	F	T	T
7	14314680	14378558	1	2.42	5.36	5.54e-13	3.57e-12	1.11e-08	gene:ENSBTAG00000037693	ENSBTAG00000037693	-1	45	protein_coding	F	F	F	F	F	F	F	T	F
7	15550298	15556967	1.48	8.17	287.9	4.44e-16	3.44e-15	8.87e-12	OLFM2	ENSBTAG00000007550	-1	52.38	protein_coding	F	F	F	F	F	F	T	T	T
7	15769155	15811269	0.69	6.47	88.84	0	0	0	COL5A3	ENSBTAG00000010179	-1	51.85	protein_coding	F	F	F	F	T	F	T	F	F
7	15876346	15880691	21.16	2.62	6.15	0	0	0	C7H19orf66	ENSBTAG00000015636	1	57.41	protein_coding	T	T	F	F	F	F	F	T	T
7	16054555	16061272	0.78	8.32	320.3	0	0	0	ICAM5	ENSBTAG00000010316	1	60.75	protein_coding	T	F	F	F	F	F	F	F	F
7	16248165	16252264	2.85	5.78	54.8	0	0	0	S1PR5	ENSBTAG00000003544	-1	56.44	protein_coding	F	F	F	F	F	F	T	T	T
7	16302066	16312788	14.38	4.17	18.02	0	0	0	AP1M2	ENSBTAG00000021160	-1	51.2	protein_coding	T	T	F	F	F	F	F	T	F
7	16998453	17003707	3	3.15	8.87	0	0	0	EPOR	ENSBTAG00000008197	-1	58.52	protein_coding	T	F	F	F	F	F	T	T	T
7	17671971	17688355	0.55	3.78	13.73	6.39e-11	3.56e-10	1.28e-06	CAMSAP3	ENSBTAG00000011356	1	58.72	protein_coding	T	F	F	F	F	F	T	F	T
7	17757622	17768585	1.32	2.68	6.4	4.88e-07	2e-06	0.00975	FCER2	ENSBTAG00000004270	-1	54.02	protein_coding	F	F	F	F	F	F	T	F	F
7	18128319	18163612	0.64	4.54	23.22	2.88e-08	1.31e-07	0.000575	CERS4	ENSBTAG00000003434	1	50.86	protein_coding	T	T	F	F	T	F	T	T	F
7	18200291	18210847	1.12	4.58	23.95	0	0	0	KANK3	ENSBTAG00000002469	-1	56.61	protein_coding	T	T	F	F	T	F	T	T	T
7	18351370	18388976	0.41	4.24	18.9	1.5e-07	6.41e-07	0.00299	MYO1F	ENSBTAG00000007661	-1	51.53	protein_coding	T	F	F	F	F	F	F	T	F
7	18391616	18408987	3.46	2.15	4.45	0	0	0	ADAMTS10	ENSBTAG00000014207	-1	56.36	protein_coding	T	F	F	F	F	F	T	F	T
7	18989689	19025591	4.12	4.09	17.03	0	0	0	C3	ENSBTAG00000017280	1	49.34	protein_coding	T	F	F	F	F	F	T	T	F
7	19206050	19212080	142.92	5.41	42.64	0	0	0	TUBB4A	ENSBTAG00000021013	1	55.26	protein_coding	T	T	F	F	T	F	F	T	T
7	19691006	19692540	3.8	2.65	6.28	9.59e-14	6.51e-13	1.92e-09	CAPS	ENSBTAG00000006069	-1	63.84	protein_coding	F	T	F	F	F	F	F	F	F
7	20787833	20800309	1.86	4.36	20.54	0	0	0	SEMA6B	ENSBTAG00000031658	1	57.84	protein_coding	F	F	F	F	F	F	F	F	F
7	20979098	20990894	19.54	3.1	8.59	0	0	0	FSD1	ENSBTAG00000005999	-1	52.34	protein_coding	T	T	F	F	F	F	T	T	T
7	21041967	21063254	0.36	4.35	20.39	4.37e-09	2.14e-08	8.74e-05	ANKRD24	ENSBTAG00000014774	-1	51.7	protein_coding	T	T	F	T	T	F	T	T	F
7	21088135	21099619	7.55	5.14	35.25	0	0	0	CREB3L3	ENSBTAG00000010215	-1	51.99	protein_coding	F	T	F	T	T	F	T	T	F
7	21290813	21294189	1.79	4.32	19.96	1.32e-06	5.22e-06	0.03	NMRK2	ENSBTAG00000031573	-1	59.37	protein_coding	F	F	F	F	F	F	F	F	F
7	21307819	21345603	3.28	3.29	9.76	0	0	0	ATCAY	ENSBTAG00000018375	-1	49.32	protein_coding	F	F	F	F	T	F	T	F	F
7	21421266	21429075	0.71	4.66	25.29	8.33e-09	3.98e-08	0.000166	MATK	ENSBTAG00000006619	1	60.6	protein_coding	F	T	F	F	T	F	F	F	F
7	21447998	21478598	1.77	4.06	16.64	0	0	0	TJP3	ENSBTAG00000018342	-1	52.82	protein_coding	T	T	F	F	T	F	F	T	F
7	21907306	21926375	2.34	3.43	10.74	0	0	0	GNA15	ENSBTAG00000019988	-1	51.55	protein_coding	F	F	F	F	F	F	T	T	F
7	21999033	22018639	6.6	3.24	9.48	0	0	0	TLE2	ENSBTAG00000001153	1	52.78	protein_coding	T	F	F	F	F	F	T	T	F
7	22019474	22023366	3.67	3.77	13.64	0	0	0	gene:ENSBTAG00000001152	ENSBTAG00000001152	-1	58.67	protein_coding	T	F	F	F	F	F	T	T	F
7	22200650	22338566	3.1	2.29	4.89	0	0	0	GNG7	ENSBTAG00000007644	1	51.45	protein_coding	T	T	F	F	T	F	T	T	T
7	23382935	23425468	1.48	5.92	60.67	0	0	0	SLC22A4	ENSBTAG00000031209	-1	44.65	protein_coding	T	T	F	F	F	F	T	T	F
7	30346723	30452439	0.13	6.47	88.95	1.23e-06	4.84e-06	0.02	ZNF608	ENSBTAG00000016137	1	41.97	protein_coding	T	F	F	F	F	F	T	T	T
7	3702330	3711347	25.06	4.48	22.38	0	0	0	CILP2	ENSBTAG00000014969	-1	62	protein_coding	T	F	F	F	F	F	F	T	T
7	3926972	3933852	5.75	2.3	4.91	0	0	0	TM6SF2	ENSBTAG00000016042	1	55.36	protein_coding	T	T	F	F	F	F	F	F	F
7	3938570	3941465	2.45	6.51	91.07	0	0	0	HAPLN4	ENSBTAG00000001765	1	58.36	protein_coding	T	T	F	F	F	F	F	F	F
7	39936164	39946911	0.53	7.87	233.87	5e-15	3.66e-14	9.98e-11	FGFR4	ENSBTAG00000010543	1	58.58	protein_coding	F	F	F	F	F	F	T	F	T
7	40214182	40227956	1.04	3.27	9.64	1.07e-10	5.86e-10	2.14e-06	RGS14	ENSBTAG00000008497	1	57.63	protein_coding	F	F	F	F	F	F	T	T	F
7	40675390	40700658	1.93	2.34	5.07	1.24e-06	4.91e-06	0.02	COL23A1	ENSBTAG00000013183	-1	53.88	protein_coding	F	F	F	F	F	F	T	F	F
7	4354380	4361950	4.29	5.82	56.6	0	0	0	COMP	ENSBTAG00000004630	1	63.22	protein_coding	F	F	F	F	F	F	F	F	F
7	44723005	44753033	0.49	6.99	126.97	1.85e-07	7.88e-07	0.0037	SHC2	ENSBTAG00000016072	-1	53.73	protein_coding	F	F	F	F	F	F	F	F	F
7	44773998	44778671	0.64	4.46	21.98	1.34e-07	5.78e-07	0.00268	MADCAM1	ENSBTAG00000039355	1	59.18	protein_coding	F	T	F	T	F	F	F	T	F
7	44831440	44850882	14.98	3.35	10.21	0	0	0	HCN2	ENSBTAG00000015050	1	57.71	protein_coding	T	F	F	F	F	F	T	T	F
7	44876207	44878971	6.38	3.07	8.4	3.33e-15	2.46e-14	6.66e-11	FGF22	ENSBTAG00000027357	1	61.99	protein_coding	F	F	F	F	T	F	T	T	T
7	45030310	45032845	1.47	3	8	5.9e-07	2.4e-06	0.01	CFD	ENSBTAG00000048122	1	63.25	protein_coding	F	T	T	F	F	F	T	T	T
7	4507987	4513857	46.95	4.58	23.99	0	0	0	TMEM59L	ENSBTAG00000007698	-1	57.78	protein_coding	T	F	F	F	F	F	T	T	T
7	45130771	45141868	2.62	6.63	99.25	0	0	0	GRIN3B	ENSBTAG00000025597	1	60.25	protein_coding	T	T	F	F	T	F	F	T	F
7	45165707	45182208	3.48	5.48	44.48	0	0	0	ABCA7	ENSBTAG00000020766	1	60.37	protein_coding	T	T	F	F	F	F	F	T	F
7	45182657	45191973	5.28	2.25	4.77	0	0	0	ARHGAP45	ENSBTAG00000020772	1	61.65	protein_coding	T	F	F	F	F	F	F	T	T
7	4522623	4530594	9.34	4.2	18.33	0	0	0	CRLF1	ENSBTAG00000007741	1	59.51	protein_coding	T	F	F	F	F	F	F	F	F
7	45433859	45436865	129.87	2.45	5.45	0	0	0	GAMT	ENSBTAG00000004112	-1	64.02	protein_coding	F	T	F	F	F	F	F	F	F
7	45508320	45513924	1.84	2.9	7.44	1.53e-13	1.02e-12	3.05e-09	PCSK4	ENSBTAG00000002305	-1	63.47	protein_coding	T	F	F	F	F	F	F	T	F
7	45515185	45520639	13.91	3.3	9.83	0	0	0	REEP6	ENSBTAG00000002311	1	60.53	protein_coding	T	F	F	F	F	F	F	T	F
7	45738428	45760463	0.27	4.75	26.96	3.25e-09	1.61e-08	6.48e-05	ATP8B3	ENSBTAG00000020229	-1	56.92	protein_coding	T	T	F	F	F	F	F	F	F
7	4669453	4672648	94.56	3.59	12.07	0	0	0	ISYNA1	ENSBTAG00000017482	1	67.55	protein_coding	T	T	F	F	F	F	F	T	F
7	4673275	4689001	17.53	2.27	4.82	0	0	0	SSBP4	ENSBTAG00000003947	-1	62.37	protein_coding	T	T	F	F	F	F	T	T	F
7	4843442	4910673	6.71	9.79	887.04	0	0	0	CIST1	ENSBTAG00000033886	1	50.01	protein_coding	T	T	F	T	F	F	T	T	T
7	48966620	48985225	3.2	2.28	4.84	0	0	0	FBXL21	ENSBTAG00000025182	1	40.65	protein_coding	T	F	F	F	F	F	F	F	F
7	4927816	4939026	1.55	8.92	483.77	0	0	0	PDE4C	ENSBTAG00000010652	1	56.45	protein_coding	T	F	F	F	F	F	F	T	F
7	5111700	5134438	2	3.75	13.47	0	0	0	KCNN1	ENSBTAG00000008626	-1	52.75	protein_coding	T	F	F	F	T	F	F	T	F
7	52290536	52293580	2.47	2.48	5.59	6.66e-16	5.11e-15	1.33e-11	PROB1	ENSBTAG00000030520	-1	67.98	protein_coding	T	T	F	F	F	F	T	T	T
7	5236645	5249994	0.84	3.96	15.52	6.66e-16	5.11e-15	1.33e-11	JAK3	ENSBTAG00000020904	1	56.1	protein_coding	T	F	F	F	F	F	T	T	T
7	5396671	5452286	1.42	2.51	5.71	0	0	0	UNC13A	ENSBTAG00000012682	1	51.21	protein_coding	T	F	F	F	F	F	T	F	F
7	54359830	54363506	2.42	2.26	4.79	7.1e-12	4.24e-11	1.42e-07	RELL2	ENSBTAG00000017371	1	59.83	protein_coding	F	F	F	F	F	F	F	T	F
7	54377030	54453900	2.87	4.7	25.91	0	0	0	ARAP3	ENSBTAG00000015938	-1	44.34	protein_coding	T	T	F	F	F	F	T	T	T
7	54624665	54639999	5.46	3.54	11.67	0	0	0	PCDH1	ENSBTAG00000012518	-1	56.57	protein_coding	T	T	F	F	F	F	F	T	F
7	5494990	5514016	2.55	2.82	7.08	0	0	0	FAM129C	ENSBTAG00000018946	-1	51.24	protein_coding	T	F	F	F	F	F	T	T	T
7	5655109	5659111	1.07	2.21	4.62	1.89e-08	8.74e-08	0.000378	gene:ENSBTAG00000045588	ENSBTAG00000045588	1	54.16	protein_coding	T	T	F	F	F	F	T	T	F
7	5668742	5671232	2.53	7.82	225.71	5.82e-14	4e-13	1.16e-09	gene:ENSBTAG00000008021	ENSBTAG00000008021	1	55.8	protein_coding	T	T	F	F	F	F	T	T	F
7	59782768	60099412	4.81	4	16	0	0	0	PPP2R2B	ENSBTAG00000001862	-1	41.82	protein_coding	F	F	F	F	T	F	T	T	F
7	60809074	60998968	3.43	2.9	7.49	0	0	0	JAKMIP2	ENSBTAG00000003349	-1	39.26	protein_coding	F	F	F	F	F	F	T	T	T
7	62502507	62637900	15.14	2.61	6.1	0	0	0	ABLIM3	ENSBTAG00000004896	1	45.27	protein_coding	F	T	F	F	F	F	T	T	T
7	6285842	6312400	8.07	3.29	9.77	0	0	0	TMEM38A	ENSBTAG00000013614	-1	47.68	protein_coding	T	F	F	F	F	F	T	T	F
7	63190542	63267311	0.36	3.28	9.73	7.4e-07	2.99e-06	0.01	PDE6A	ENSBTAG00000012945	-1	43.39	protein_coding	F	T	F	T	T	F	T	T	T
7	63576976	63641028	0.9	2.96	7.77	5.01e-09	2.44e-08	0.0001	CAMK2A	ENSBTAG00000020087	-1	52.94	protein_coding	F	T	F	T	T	F	T	T	F
7	63748885	63756646	2.44	2.03	4.1	1.09e-08	5.15e-08	0.000218	CD74	ENSBTAG00000015228	-1	53.47	protein_coding	F	F	F	F	T	F	T	T	T
7	64286948	64295116	13.08	3.46	10.99	0	0	0	GPX3	ENSBTAG00000043553	1	53.68	protein_coding	F	F	F	F	F	F	T	T	T
7	64499096	64511547	22.31	2.54	5.83	0	0	0	GM2A	ENSBTAG00000021829	1	47.98	protein_coding	F	F	F	F	F	F	T	T	F
7	64703774	64769031	0.43	3.47	11.12	0	0	0	gene:ENSBTAG00000003498	ENSBTAG00000003498	-1	45.29	protein_coding	F	F	F	F	F	F	T	F	F
7	70691095	70731179	6.49	2.34	5.05	0	0	0	gene:ENSBTAG00000036102	ENSBTAG00000036102	-1	39.22	protein_coding	F	F	F	F	F	F	T	T	F
7	73611117	73672127	1.86	2.4	5.28	9.08e-10	4.68e-09	1.81e-05	ADRA1B	ENSBTAG00000040253	1	43.59	protein_coding	F	F	F	F	F	F	T	F	F
7	74035698	74057799	4.71	2.58	5.99	1.32e-14	9.42e-14	2.64e-10	C1QTNF2	ENSBTAG00000001367	-1	45.63	protein_coding	F	F	F	F	T	F	F	F	T
7	8389985	8399577	1.14	3.16	8.93	6.65e-07	2.69e-06	0.01	gene:ENSBTAG00000039337	ENSBTAG00000039337	-1	45.72	protein_coding	F	F	F	F	F	F	F	F	F
7	8431773	8450807	0.53	3.37	10.35	3.04e-07	1.27e-06	0.00607	CYP4F2_1	ENSBTAG00000015735	-1	46.78	protein_coding	F	T	F	F	F	F	F	F	F
7	8585122	8616384	7.82	3.48	11.16	0	0	0	CYP4F3	ENSBTAG00000048257	-1	44.85	protein_coding	F	T	T	F	T	F	T	F	F
7	8702090	8707156	0.96	4.37	20.67	9.59e-12	5.67e-11	1.92e-07	PGLYRP2	ENSBTAG00000012280	1	55.48	protein_coding	T	T	F	F	F	F	T	F	F
8	104244730	104247975	1.17	5.06	33.45	1.03e-10	5.65e-10	2.06e-06	RNF183	ENSBTAG00000004572	-1	54	protein_coding	F	F	F	F	F	F	T	T	T
8	104306683	104329562	2.27	6.2	73.49	0	0	0	BSPRY	ENSBTAG00000044155	1	46.22	protein_coding	F	T	F	F	F	F	T	T	T
8	107410463	107471104	1.37	4.98	31.57	3.15e-09	1.56e-08	6.29e-05	gene:ENSBTAG00000047511	ENSBTAG00000047511	-1	46.66	protein_coding	F	F	F	F	F	F	T	F	F
8	44310613	44545537	0.79	2.14	4.42	1.55e-13	1.03e-12	3.09e-09	DOCK8	ENSBTAG00000002190	-1	40.99	protein_coding	F	T	T	F	F	F	T	T	T
8	46883356	46907760	0.75	4.49	22.4	6.91e-08	3.04e-07	0.00138	KLF9	ENSBTAG00000016229	-1	45.25	protein_coding	F	T	F	F	F	F	T	T	T
8	62271951	62322309	1.95	2.51	5.69	0	0	0	FRMPD1	ENSBTAG00000046574	1	43.77	protein_coding	T	F	F	F	F	F	T	T	F
8	63509720	63510841	1.48	2.71	6.56	1.59e-06	6.22e-06	0.03	FOXE1	ENSBTAG00000014760	1	72.37	protein_coding	T	T	T	F	F	F	T	F	F
8	67481089	67511227	0.49	3.15	8.86	9.98e-08	4.33e-07	0.00199	LPL	ENSBTAG00000012855	1	40.33	protein_coding	F	F	F	F	F	F	T	T	T
8	69871349	69896984	2.54	3.06	8.32	0	0	0	DMTN	ENSBTAG00000045887	1	53.53	protein_coding	T	F	F	F	F	F	T	T	T
8	69964100	69970068	4.49	6.54	93.37	0	0	0	LGI3	ENSBTAG00000004578	-1	55.19	protein_coding	T	T	F	T	F	F	F	T	T
8	69976552	69979463	1.05	4.26	19.1	1.47e-06	5.77e-06	0.03	SFTPC	ENSBTAG00000012560	1	55.63	protein_coding	T	T	F	T	F	F	F	T	T
8	75041540	75049413	1.04	2.31	4.96	3.67e-11	2.07e-10	7.32e-07	PNMA2	ENSBTAG00000037986	-1	48.11	protein_coding	F	F	F	F	F	F	F	F	F
8	75636008	75659670	3.52	5.71	52.21	0	0	0	STMN4	ENSBTAG00000017627	-1	47.35	protein_coding	F	F	F	F	F	F	T	T	F
8	75908165	75977482	6.89	4.35	20.34	0	0	0	EPHX2	ENSBTAG00000015241	1	45.31	protein_coding	F	F	F	F	F	F	T	F	T
8	76525369	76531334	3.26	2.98	7.91	0	0	0	AQP3	ENSBTAG00000008493	-1	56.81	protein_coding	F	T	F	T	T	F	F	F	F
8	77165420	77234158	1.49	6.4	84.2	0	0	0	DNAI1	ENSBTAG00000008538	1	47.98	protein_coding	T	F	F	F	F	F	T	T	T
8	77234224	77236116	21.37	2.07	4.2	0	0	0	ENHO	ENSBTAG00000008539	-1	61.17	protein_coding	T	F	F	F	F	F	T	F	F
8	77260361	77298847	1.51	3.17	8.98	8.49e-10	4.38e-09	1.7e-05	CNTFR	ENSBTAG00000015361	-1	57.54	protein_coding	T	T	F	F	T	F	T	F	F
8	79336288	79743284	1.59	2.19	4.57	3.34e-12	2.04e-11	6.67e-08	NTRK2	ENSBTAG00000010647	1	41.16	protein_coding	T	F	T	F	F	F	F	T	T
8	82396095	82438817	5.62	2.5	5.65	0	0	0	FBP2	ENSBTAG00000019554	-1	42.24	protein_coding	F	F	F	F	F	F	T	F	F
8	82460864	82491694	35.05	4.24	18.91	0	0	0	FBP1	ENSBTAG00000009733	-1	43.96	protein_coding	F	F	F	F	F	F	T	F	F
8	85453019	85468721	0.91	4.1	17.13	8.33e-13	5.31e-12	1.66e-08	OGN	ENSBTAG00000011824	1	33.88	protein_coding	F	F	F	F	F	F	T	T	T
8	85820087	85852096	3.67	3.7	12.99	0	0	0	FGD3	ENSBTAG00000006939	1	49.62	protein_coding	F	F	F	F	F	F	T	T	T
8	85876326	85895632	32.96	3.27	9.62	0	0	0	SUSD3	ENSBTAG00000000181	1	50.52	protein_coding	F	F	F	F	F	F	T	T	T
8	85984692	86130645	0.85	2.12	4.35	9.93e-14	6.71e-13	1.98e-09	WNK2	ENSBTAG00000008301	1	47.16	protein_coding	T	F	F	F	F	F	T	T	T
8	86686388	86689386	2.8	5.04	32.94	1.28e-14	9.13e-14	2.55e-10	BARX1	ENSBTAG00000004468	-1	63.32	protein_coding	F	F	F	F	F	F	F	F	F
8	90136712	90262973	3.77	2.01	4.03	0	0	0	SEMA4D	ENSBTAG00000001941	1	50.78	protein_coding	F	T	F	F	T	F	T	T	T
8	91124599	91132281	0.64	7.19	145.82	7.5e-10	3.89e-09	1.5e-05	NXNL2	ENSBTAG00000019958	-1	50.41	protein_coding	T	F	F	F	F	F	F	F	T
9	104124502	104134436	0.53	4.67	25.37	1.97e-08	9.09e-08	0.000394	DACT2	ENSBTAG00000031532	-1	64.04	protein_coding	F	F	F	F	F	F	F	F	F
9	104268693	104380527	3.15	4.73	26.48	0	0	0	SMOC2	ENSBTAG00000013176	1	51.89	protein_coding	T	F	F	F	F	F	F	F	T
9	23710554	23729764	13.07	2.43	5.37	0	0	0	PRSS35	ENSBTAG00000026708	1	41.17	protein_coding	F	F	F	T	F	F	T	T	T
9	23746500	23855786	1.51	4.15	17.76	0	0	0	SNAP91	ENSBTAG00000009355	-1	38.55	protein_coding	F	F	F	T	F	F	T	T	F
9	40275982	40293610	0.93	3.72	13.18	9.33e-10	4.8e-09	1.86e-05	DDO	ENSBTAG00000033367	1	43.96	protein_coding	T	F	F	F	F	F	F	T	F
9	44355220	44377512	0.57	2.49	5.62	1.11e-08	5.25e-08	0.000222	PRDM1	ENSBTAG00000000816	-1	42.45	protein_coding	F	T	F	F	T	F	T	T	T
9	61890330	61907177	9.31	2.51	5.69	0	0	0	SRSF12	ENSBTAG00000046235	1	37.73	protein_coding	F	F	F	F	F	F	T	T	T
9	75979324	76012398	3.69	2.73	6.66	0	0	0	IL20RA	ENSBTAG00000015638	-1	40.93	protein_coding	F	T	F	F	T	F	T	F	F
9	81550367	81829531	18.43	2.21	4.63	0	0	0	AIG1	ENSBTAG00000003496	1	41.43	protein_coding	F	F	F	F	F	F	T	T	T
9	88262868	88266693	6.6	2.07	4.19	1.35e-13	9.03e-13	2.7e-09	gene:ENSBTAG00000036061	ENSBTAG00000036061	1	53.4	protein_coding	F	F	F	F	F	F	T	F	F
9	98421510	99568077	0.75	2.97	7.86	1.98e-06	7.65e-06	0.04	PRKN	ENSBTAG00000018996	-1	42.37	protein_coding	F	F	T	F	T	F	T	T	T
X	128333460	128534906	0.76	5.22	37.23	9.6e-13	6.1e-12	1.92e-08	PHEX	ENSBTAG00000000419	-1	40.92	protein_coding	F	T	F	F	F	F	T	T	F
X	131866408	131954986	2.89	2.03	4.07	9.6e-14	6.51e-13	1.92e-09	PPEF1	ENSBTAG00000009545	-1	39.19	protein_coding	F	F	F	F	F	F	F	F	F
X	132948151	132949722	0.7	7.27	154.42	4.69e-09	2.29e-08	9.37e-05	RAI2	ENSBTAG00000039049	1	62.85	protein_coding	F	F	F	F	F	F	F	T	F
X	137588934	137693777	1.19	2.4	5.26	6.26e-10	3.26e-09	1.25e-05	ARHGAP6	ENSBTAG00000002626	1	41.87	protein_coding	F	F	F	F	F	F	T	T	F
X	138878612	138902586	0.27	3.71	13.09	9.9e-12	5.85e-11	1.98e-07	MXRA5	ENSBTAG00000022150	1	52.91	protein_coding	F	F	F	F	T	F	T	F	T
X	14002641	14013045	5.2	2.14	4.4	1.11e-15	8.43e-15	2.22e-11	RAB33A	ENSBTAG00000034712	1	47.8	protein_coding	F	F	F	F	F	F	F	T	F
X	142758548	142827683	4.32	4.73	26.56	0	0	0	CLCN4	ENSBTAG00000011121	-1	46.56	protein_coding	T	F	F	F	F	F	F	T	F
X	143861798	143891357	1.45	2.57	5.94	1.34e-07	5.76e-07	0.00268	GPR143	ENSBTAG00000006472	1	50.76	protein_coding	F	F	F	F	F	F	F	T	F
X	18770047	18782689	0.99	3.82	14.16	2.3e-07	9.72e-07	0.0046	CT55	ENSBTAG00000019546	-1	40.56	protein_coding	T	F	F	F	F	F	F	F	F
X	3126452	3129071	1.53	2.96	7.76	5.31e-11	2.97e-10	1.06e-06	ZCCHC12	ENSBTAG00000035018	1	48.93	protein_coding	T	F	F	F	F	F	F	F	F
X	35452632	35491147	1.25	3.59	12	1.32e-12	8.28e-12	2.63e-08	ZNF185	ENSBTAG00000005776	1	50.1	protein_coding	F	T	T	F	T	F	F	F	F
X	39677597	39720987	1.65	9.96	996.91	0	0	0	ATP2B3	ENSBTAG00000000520	1	56.46	protein_coding	F	T	F	F	F	F	T	T	F
X	39990127	40004312	30.55	6.72	105.69	0	0	0	L1CAM	ENSBTAG00000013462	-1	60.02	protein_coding	T	F	F	F	F	F	T	T	T
X	40263164	40291627	1.37	3.67	12.69	1.95e-12	1.21e-11	3.89e-08	TKTL1	ENSBTAG00000020127	1	44.67	protein_coding	F	F	F	F	F	F	F	T	T
X	4995337	5043066	5.31	3.59	12.07	0	0	0	TMEM255A	ENSBTAG00000017187	1	46.51	protein_coding	T	F	F	F	F	F	F	T	F
X	54954895	54967415	2.03	3.75	13.48	0	0	0	TMEM35A	ENSBTAG00000021252	1	42.59	protein_coding	F	F	F	F	F	F	F	T	F
X	55319417	55323805	0.21	6.83	114.09	1.12e-06	4.45e-06	0.02	gene:ENSBTAG00000026141	ENSBTAG00000026141	1	55.23	protein_coding	T	F	F	F	F	F	F	F	F
X	55368951	55370786	3.78	4.04	16.46	0	0	0	ARMCX1	ENSBTAG00000026139	1	43.57	protein_coding	F	F	F	F	F	F	F	F	F
X	56840833	56905852	3.56	2.33	5.01	0	0	0	RNF128	ENSBTAG00000022920	-1	38	protein_coding	F	F	F	F	F	F	T	T	T
X	57184740	57186320	30.67	3.71	13.11	0	0	0	BEX2_2	ENSBTAG00000036028	-1	56.48	protein_coding	T	F	F	F	F	F	F	F	F
X	57269280	57270782	16.38	3.47	11.04	0	0	0	BEX3	ENSBTAG00000006026	1	54.49	protein_coding	T	F	F	F	F	F	F	F	F
X	61054247	61125754	0.23	4.22	18.67	1.36e-08	6.36e-08	0.000271	COL4A6	ENSBTAG00000013760	-1	44.98	protein_coding	F	F	F	F	F	F	F	F	F
X	63497121	63590236	5.82	2.2	4.59	0	0	0	CHRDL1	ENSBTAG00000004432	-1	42.23	protein_coding	F	F	F	F	F	F	T	F	F
X	64684214	64708869	13.8	3.94	15.4	0	0	0	CAPN6	ENSBTAG00000000828	-1	42.04	protein_coding	F	F	F	F	F	F	T	F	F
X	80601977	80604221	1.66	2.7	6.49	1.17e-13	7.88e-13	2.34e-09	MAGEE2	ENSBTAG00000025062	-1	46.64	protein_coding	F	F	F	F	F	F	T	F	F
X	81604863	81621189	2.44	3.33	10.06	2.11e-15	1.58e-14	4.21e-11	SLC16A2	ENSBTAG00000002585	-1	44.5	protein_coding	F	F	F	F	F	F	F	F	F
X	85309754	85319162	1.19	8.55	373.65	0	0	0	GDPD2	ENSBTAG00000012863	-1	52.9	protein_coding	F	F	F	F	T	F	F	F	F
X	85898898	85899424	25.67	10.89	1893.21	0	0	0	RPL23A_3	ENSBTAG00000022278	1	48.39	protein_coding	F	F	F	F	F	F	F	F	F
X	91223900	91228056	5.15	2.33	5.04	1.45e-12	9.12e-12	2.91e-08	SYN1	ENSBTAG00000005042	-1	50.3	protein_coding	F	F	F	F	F	F	F	T	F
X	93078364	93096381	1.49	6.56	94.46	0	0	0	AKAP4	ENSBTAG00000016399	-1	41.4	protein_coding	F	F	F	F	F	F	T	F	F
