# Supplementary material for: Functional annotation of the cattle genome through systematic discovery and characterization of chromatin states and butyrate-induced variations
Source: BMC Biol. 2019 Aug 16;17:68. doi: 10.1186/s12915-019-0687-8 (PMC6698049; doi:10.1186/s12915-019-0687-8)
Supplement: Supplementary file 6 — Table S5. Enrichment analysis of differentially expressed genes (DEGs) for tissue-specific genes across 91 tissues/cell types in cattle. (XLSX 47 kb) [file 12915_2019_687_MOESM6_ESM.xlsx]

## Sheet: Sheet1
Table S5 Enrichment analysis of differentially expressed genes (DEGs) for tissue-specific genes across 91 tissues/cell types in cattle
Tissue	Input	Background	P	FDR	Genes
Ileum	242	1230	5.57345e-83	5.07184e-81	ENSBTAG00000019722;ENSBTAG00000011036;ENSBTAG00000017864;ENSBTAG00000040316;ENSBTAG00000015046;ENSBTAG00000008331;ENSBTAG00000014456;ENSBTAG00000021964;ENSBTAG00000039355;ENSBTAG00000016042;ENSBTAG00000023374;ENSBTAG00000048257;ENSBTAG00000016881;ENSBTAG00000001481;ENSBTAG00000000986;ENSBTAG00000012284;ENSBTAG00000005675;ENSBTAG00000018240;ENSBTAG00000011275;ENSBTAG00000010033;ENSBTAG00000026836;…
Gall_Bladder	212	1230	1.75767e-61	1.59948e-59	ENSBTAG00000003054;ENSBTAG00000003060;ENSBTAG00000015715;ENSBTAG00000001675;ENSBTAG00000002599;ENSBTAG00000016766;ENSBTAG00000017500;ENSBTAG00000002981;ENSBTAG00000012078;ENSBTAG00000012443;ENSBTAG00000004221;ENSBTAG00000014335;ENSBTAG00000012035;ENSBTAG00000032591;ENSBTAG00000010077;ENSBTAG00000016406;ENSBTAG00000020028;ENSBTAG00000008714;ENSBTAG00000006882;ENSBTAG00000031658;ENSBTAG00000040042;…
Diaphragm	211	1230	8.27031e-61	7.52598e-59	ENSBTAG00000003054;ENSBTAG00000003060;ENSBTAG00000001675;ENSBTAG00000015715;ENSBTAG00000016766;ENSBTAG00000012443;ENSBTAG00000002599;ENSBTAG00000012078;ENSBTAG00000002981;ENSBTAG00000017500;ENSBTAG00000004221;ENSBTAG00000036061;ENSBTAG00000006672;ENSBTAG00000016406;ENSBTAG00000032591;ENSBTAG00000010077;ENSBTAG00000006882;ENSBTAG00000008758;ENSBTAG00000016399;ENSBTAG00000005456;ENSBTAG00000014335;…
Duodenum	204	1230	3.49269e-56	3.17834e-54	ENSBTAG00000040111;ENSBTAG00000011036;ENSBTAG00000019722;ENSBTAG00000001026;ENSBTAG00000014456;ENSBTAG00000016042;ENSBTAG00000003380;ENSBTAG00000015046;ENSBTAG00000021964;ENSBTAG00000039355;ENSBTAG00000002620;ENSBTAG00000022715;ENSBTAG00000008331;ENSBTAG00000000496;ENSBTAG00000007799;ENSBTAG00000001343;ENSBTAG00000006882;ENSBTAG00000000986;ENSBTAG00000010109;ENSBTAG00000010215;ENSBTAG00000019262;…
Hippocampus	200	1230	1.32066e-53	1.2018e-51	ENSBTAG00000019940;ENSBTAG00000015789;ENSBTAG00000004878;ENSBTAG00000015576;ENSBTAG00000011092;ENSBTAG00000017627;ENSBTAG00000013550;ENSBTAG00000017780;ENSBTAG00000001401;ENSBTAG00000004292;ENSBTAG00000010316;ENSBTAG00000000791;ENSBTAG00000006273;ENSBTAG00000007955;ENSBTAG00000021336;ENSBTAG00000012215;ENSBTAG00000032709;ENSBTAG00000007036;ENSBTAG00000038974;ENSBTAG00000018375;ENSBTAG00000006080;…
Jejunum	200	1230	1.32066e-53	1.2018e-51	ENSBTAG00000019722;ENSBTAG00000017864;ENSBTAG00000011036;ENSBTAG00000016042;ENSBTAG00000001026;ENSBTAG00000020828;ENSBTAG00000015843;ENSBTAG00000040111;ENSBTAG00000039355;ENSBTAG00000000986;ENSBTAG00000015046;ENSBTAG00000007799;ENSBTAG00000014456;ENSBTAG00000021964;ENSBTAG00000021069;ENSBTAG00000010215;ENSBTAG00000005269;ENSBTAG00000021686;ENSBTAG00000010033;ENSBTAG00000015735;ENSBTAG00000005456;…
Diencephalon	197	1230	1.05256e-51	9.57829e-50	ENSBTAG00000001765;ENSBTAG00000019940;ENSBTAG00000015789;ENSBTAG00000004878;ENSBTAG00000011092;ENSBTAG00000015784;ENSBTAG00000017627;ENSBTAG00000021336;ENSBTAG00000017780;ENSBTAG00000032709;ENSBTAG00000018375;ENSBTAG00000001401;ENSBTAG00000033699;ENSBTAG00000004292;ENSBTAG00000013550;ENSBTAG00000000791;ENSBTAG00000004578;ENSBTAG00000015576;ENSBTAG00000006273;ENSBTAG00000038974;ENSBTAG00000027387;…
Frontal_cortex	191	1230	5.5246e-48	5.02738e-46	ENSBTAG00000001765;ENSBTAG00000019940;ENSBTAG00000015784;ENSBTAG00000011092;ENSBTAG00000015789;ENSBTAG00000004878;ENSBTAG00000021336;ENSBTAG00000015576;ENSBTAG00000017627;ENSBTAG00000006273;ENSBTAG00000013550;ENSBTAG00000012682;ENSBTAG00000001401;ENSBTAG00000032709;ENSBTAG00000017780;ENSBTAG00000000791;ENSBTAG00000018375;ENSBTAG00000004292;ENSBTAG00000013867;ENSBTAG00000038974;ENSBTAG00000014312;…
Abomasum	190	1230	2.2462e-47	2.04404e-45	ENSBTAG00000015046;ENSBTAG00000032059;ENSBTAG00000031538;ENSBTAG00000046365;ENSBTAG00000023374;ENSBTAG00000022142;ENSBTAG00000017132;ENSBTAG00000008331;ENSBTAG00000004468;ENSBTAG00000011036;ENSBTAG00000015412;ENSBTAG00000015232;ENSBTAG00000007583;ENSBTAG00000040111;ENSBTAG00000000660;ENSBTAG00000007502;ENSBTAG00000014456;ENSBTAG00000046350;ENSBTAG00000024726;ENSBTAG00000032481;ENSBTAG00000020190;…
Temporal_cortex	187	1230	1.44562e-45	1.31552e-43	ENSBTAG00000019940;ENSBTAG00000001765;ENSBTAG00000015784;ENSBTAG00000015789;ENSBTAG00000004878;ENSBTAG00000017627;ENSBTAG00000011092;ENSBTAG00000032709;ENSBTAG00000013550;ENSBTAG00000006273;ENSBTAG00000021336;ENSBTAG00000001401;ENSBTAG00000013867;ENSBTAG00000038974;ENSBTAG00000027387;ENSBTAG00000002414;ENSBTAG00000000791;ENSBTAG00000004292;ENSBTAG00000014645;ENSBTAG00000004578;ENSBTAG00000012215;…
Cerebral_cortex	181	1230	4.91477e-42	4.47244e-40	ENSBTAG00000001765;ENSBTAG00000019940;ENSBTAG00000015784;ENSBTAG00000004878;ENSBTAG00000021336;ENSBTAG00000011092;ENSBTAG00000015789;ENSBTAG00000017627;ENSBTAG00000006273;ENSBTAG00000012682;ENSBTAG00000001401;ENSBTAG00000015576;ENSBTAG00000017780;ENSBTAG00000032709;ENSBTAG00000013550;ENSBTAG00000000791;ENSBTAG00000018375;ENSBTAG00000038974;ENSBTAG00000014312;ENSBTAG00000007955;ENSBTAG00000004292;…
Midbrain	179	1230	6.96464e-41	6.33783e-39	ENSBTAG00000015843;ENSBTAG00000001765;ENSBTAG00000015784;ENSBTAG00000019940;ENSBTAG00000015789;ENSBTAG00000011092;ENSBTAG00000017627;ENSBTAG00000032709;ENSBTAG00000004878;ENSBTAG00000021336;ENSBTAG00000014645;ENSBTAG00000001401;ENSBTAG00000006273;ENSBTAG00000000791;ENSBTAG00000004578;ENSBTAG00000038974;ENSBTAG00000002414;ENSBTAG00000023784;ENSBTAG00000027387;ENSBTAG00000017780;ENSBTAG00000014312;…
Posterior_pituitary	173	1230	1.65372e-37	1.50488e-35	ENSBTAG00000038735;ENSBTAG00000014100;ENSBTAG00000013798;ENSBTAG00000007955;ENSBTAG00000009489;ENSBTAG00000009836;ENSBTAG00000032613;ENSBTAG00000010836;ENSBTAG00000017780;ENSBTAG00000012682;ENSBTAG00000009891;ENSBTAG00000005337;ENSBTAG00000016283;ENSBTAG00000014645;ENSBTAG00000038132;ENSBTAG00000016651;ENSBTAG00000018375;ENSBTAG00000004878;ENSBTAG00000009842;ENSBTAG00000021336;ENSBTAG00000015979;…
Brain_lobe	171	1230	2.07539e-36	1.88861e-34	ENSBTAG00000001765;ENSBTAG00000019940;ENSBTAG00000004878;ENSBTAG00000015784;ENSBTAG00000011092;ENSBTAG00000017627;ENSBTAG00000015789;ENSBTAG00000014312;ENSBTAG00000006273;ENSBTAG00000013550;ENSBTAG00000021336;ENSBTAG00000012682;ENSBTAG00000007036;ENSBTAG00000027387;ENSBTAG00000000265;ENSBTAG00000033699;ENSBTAG00000037986;ENSBTAG00000001401;ENSBTAG00000038974;ENSBTAG00000013867;ENSBTAG00000002192;…
Thalamus	165	1230	3.40306e-33	3.09679e-31	ENSBTAG00000015784;ENSBTAG00000032709;ENSBTAG00000014645;ENSBTAG00000020622;ENSBTAG00000023784;ENSBTAG00000002414;ENSBTAG00000012215;ENSBTAG00000004578;ENSBTAG00000017627;ENSBTAG00000018576;ENSBTAG00000009218;ENSBTAG00000008093;ENSBTAG00000001151;ENSBTAG00000009830;ENSBTAG00000011461;ENSBTAG00000015789;ENSBTAG00000009354;ENSBTAG00000020203;ENSBTAG00000019060;ENSBTAG00000007393;ENSBTAG00000003470;…
Descending_Colon	164	1230	1.1368e-32	1.03449e-30	ENSBTAG00000019722;ENSBTAG00000017864;ENSBTAG00000014456;ENSBTAG00000000496;ENSBTAG00000021964;ENSBTAG00000026836;ENSBTAG00000015046;ENSBTAG00000020828;ENSBTAG00000011036;ENSBTAG00000008331;ENSBTAG00000039355;ENSBTAG00000012104;ENSBTAG00000032372;ENSBTAG00000010766;ENSBTAG00000040316;ENSBTAG00000021686;ENSBTAG00000013569;ENSBTAG00000017271;ENSBTAG00000009396;ENSBTAG00000006452;ENSBTAG00000003313;…
Hypothalamus	164	1230	1.1368e-32	1.03449e-30	ENSBTAG00000015784;ENSBTAG00000032709;ENSBTAG00000015789;ENSBTAG00000017627;ENSBTAG00000023784;ENSBTAG00000002414;ENSBTAG00000014645;ENSBTAG00000004578;ENSBTAG00000018576;ENSBTAG00000001765;ENSBTAG00000006273;ENSBTAG00000038974;ENSBTAG00000027387;ENSBTAG00000001401;ENSBTAG00000019940;ENSBTAG00000020622;ENSBTAG00000004878;ENSBTAG00000000791;ENSBTAG00000003470;ENSBTAG00000013173;ENSBTAG00000008093;…
Pons	163	1230	3.76736e-32	3.4283e-30	ENSBTAG00000015784;ENSBTAG00000032709;ENSBTAG00000015789;ENSBTAG00000017627;ENSBTAG00000024497;ENSBTAG00000001401;ENSBTAG00000020896;ENSBTAG00000000791;ENSBTAG00000038974;ENSBTAG00000015576;ENSBTAG00000006273;ENSBTAG00000018576;ENSBTAG00000008093;ENSBTAG00000020622;ENSBTAG00000046666;ENSBTAG00000023784;ENSBTAG00000003470;ENSBTAG00000005999;ENSBTAG00000004878;ENSBTAG00000002414;ENSBTAG00000027387;…
Caecum	161	1230	4.03923e-31	3.6757e-29	ENSBTAG00000019722;ENSBTAG00000011036;ENSBTAG00000017864;ENSBTAG00000014456;ENSBTAG00000040316;ENSBTAG00000039355;ENSBTAG00000015046;ENSBTAG00000008331;ENSBTAG00000021964;ENSBTAG00000012284;ENSBTAG00000020828;ENSBTAG00000000986;ENSBTAG00000012104;ENSBTAG00000016042;ENSBTAG00000013320;ENSBTAG00000016588;ENSBTAG00000022715;ENSBTAG00000005675;ENSBTAG00000017132;ENSBTAG00000048257;ENSBTAG00000000496;…
Medulla_oblongata	161	1230	4.03923e-31	3.6757e-29	ENSBTAG00000015784;ENSBTAG00000015789;ENSBTAG00000032709;ENSBTAG00000001765;ENSBTAG00000017627;ENSBTAG00000002414;ENSBTAG00000014645;ENSBTAG00000017864;ENSBTAG00000018576;ENSBTAG00000004578;ENSBTAG00000001401;ENSBTAG00000006273;ENSBTAG00000038974;ENSBTAG00000020622;ENSBTAG00000023784;ENSBTAG00000031669;ENSBTAG00000020203;ENSBTAG00000000791;ENSBTAG00000011092;ENSBTAG00000008093;ENSBTAG00000003470;…
Thymus	161	1230	4.03923e-31	3.6757e-29	ENSBTAG00000017133;ENSBTAG00000008956;ENSBTAG00000012695;ENSBTAG00000003313;ENSBTAG00000034295;ENSBTAG00000012461;ENSBTAG00000012925;ENSBTAG00000021219;ENSBTAG00000021249;ENSBTAG00000011131;ENSBTAG00000019961;ENSBTAG00000010527;ENSBTAG00000017797;ENSBTAG00000006453;ENSBTAG00000005390;ENSBTAG00000008542;ENSBTAG00000009035;ENSBTAG00000020772;ENSBTAG00000007860;ENSBTAG00000012737;ENSBTAG00000008436;…
Cerebellum	156	1230	1.31921e-28	1.20048e-26	ENSBTAG00000019940;ENSBTAG00000001765;ENSBTAG00000015789;ENSBTAG00000015784;ENSBTAG00000011092;ENSBTAG00000017627;ENSBTAG00000040042;ENSBTAG00000012682;ENSBTAG00000013550;ENSBTAG00000014940;ENSBTAG00000040399;ENSBTAG00000001401;ENSBTAG00000013173;ENSBTAG00000011800;ENSBTAG00000038974;ENSBTAG00000004292;ENSBTAG00000006273;ENSBTAG00000007036;ENSBTAG00000014312;ENSBTAG00000021336;ENSBTAG00000013867;…
SME	153	1230	3.85325e-27	3.50646e-25	ENSBTAG00000002123;ENSBTAG00000038735;ENSBTAG00000013798;ENSBTAG00000001152;ENSBTAG00000010836;ENSBTAG00000047511;ENSBTAG00000007955;ENSBTAG00000014100;ENSBTAG00000016651;ENSBTAG00000004888;ENSBTAG00000012682;ENSBTAG00000027387;ENSBTAG00000018726;ENSBTAG00000038132;ENSBTAG00000002104;ENSBTAG00000020127;ENSBTAG00000036102;ENSBTAG00000009836;ENSBTAG00000045895;ENSBTAG00000032613;ENSBTAG00000001279;…
Fetus_Brain	148	1230	9.02429e-25	8.2121e-23	ENSBTAG00000019940;ENSBTAG00000021336;ENSBTAG00000015789;ENSBTAG00000012682;ENSBTAG00000011092;ENSBTAG00000017627;ENSBTAG00000018375;ENSBTAG00000004878;ENSBTAG00000006080;ENSBTAG00000001401;ENSBTAG00000015576;ENSBTAG00000038974;ENSBTAG00000007955;ENSBTAG00000000791;ENSBTAG00000031669;ENSBTAG00000047167;ENSBTAG00000017780;ENSBTAG00000004292;ENSBTAG00000013550;ENSBTAG00000011800;ENSBTAG00000006273;…
Brain	147	1230	2.61959e-24	2.38383e-22	ENSBTAG00000001765;ENSBTAG00000019940;ENSBTAG00000012682;ENSBTAG00000021336;ENSBTAG00000017627;ENSBTAG00000004878;ENSBTAG00000011092;ENSBTAG00000006273;ENSBTAG00000015789;ENSBTAG00000018375;ENSBTAG00000001401;ENSBTAG00000014312;ENSBTAG00000004292;ENSBTAG00000038974;ENSBTAG00000013550;ENSBTAG00000013867;ENSBTAG00000015784;ENSBTAG00000007036;ENSBTAG00000037986;ENSBTAG00000021764;ENSBTAG00000007955;…
bladder	142	1230	4.7409e-22	4.31422e-20	ENSBTAG00000024497;ENSBTAG00000023374;ENSBTAG00000014456;ENSBTAG00000020828;ENSBTAG00000019961;ENSBTAG00000015412;ENSBTAG00000012104;ENSBTAG00000011036;ENSBTAG00000022715;ENSBTAG00000003923;ENSBTAG00000017335;ENSBTAG00000000496;ENSBTAG00000039355;ENSBTAG00000005675;ENSBTAG00000004710;ENSBTAG00000001136;ENSBTAG00000032591;ENSBTAG00000010543;ENSBTAG00000014453;ENSBTAG00000019060;ENSBTAG00000009836;…
Pineal_gland	142	1230	4.7409e-22	4.31422e-20	ENSBTAG00000038735;ENSBTAG00000014100;ENSBTAG00000016651;ENSBTAG00000007955;ENSBTAG00000004197;ENSBTAG00000013798;ENSBTAG00000016283;ENSBTAG00000010836;ENSBTAG00000009489;ENSBTAG00000015979;ENSBTAG00000032613;ENSBTAG00000009891;ENSBTAG00000009836;ENSBTAG00000008538;ENSBTAG00000002104;ENSBTAG00000021639;ENSBTAG00000001917;ENSBTAG00000000520;ENSBTAG00000005337;ENSBTAG00000004888;ENSBTAG00000017780;…
Esophagus	141	1230	1.30605e-21	1.1885e-19	ENSBTAG00000022142;ENSBTAG00000031538;ENSBTAG00000013095;ENSBTAG00000000161;ENSBTAG00000019249;ENSBTAG00000003387;ENSBTAG00000038844;ENSBTAG00000000660;ENSBTAG00000017946;ENSBTAG00000012031;ENSBTAG00000046365;ENSBTAG00000002070;ENSBTAG00000046350;ENSBTAG00000008331;ENSBTAG00000007583;ENSBTAG00000018077;ENSBTAG00000045626;ENSBTAG00000015046;ENSBTAG00000033423;ENSBTAG00000006156;ENSBTAG00000038662;…
Fornix_vagina	141	1230	1.30605e-21	1.1885e-19	ENSBTAG00000008097;ENSBTAG00000021216;ENSBTAG00000013848;ENSBTAG00000009014;ENSBTAG00000020415;ENSBTAG00000019547;ENSBTAG00000012823;ENSBTAG00000012461;ENSBTAG00000004019;ENSBTAG00000011381;ENSBTAG00000014456;ENSBTAG00000014132;ENSBTAG00000040316;ENSBTAG00000046256;ENSBTAG00000004468;ENSBTAG00000046544;ENSBTAG00000008197;ENSBTAG00000003832;ENSBTAG00000031849;ENSBTAG00000044073;ENSBTAG00000023374;…
Cervical_lining	138	1230	2.58848e-20	2.35552e-18	ENSBTAG00000004019;ENSBTAG00000020415;ENSBTAG00000012823;ENSBTAG00000021216;ENSBTAG00000008097;ENSBTAG00000013848;ENSBTAG00000040316;ENSBTAG00000008693;ENSBTAG00000003832;ENSBTAG00000004468;ENSBTAG00000027625;ENSBTAG00000011381;ENSBTAG00000013176;ENSBTAG00000019547;ENSBTAG00000008197;ENSBTAG00000007550;ENSBTAG00000008538;ENSBTAG00000004197;ENSBTAG00000016854;ENSBTAG00000019402;ENSBTAG00000003060;…
Fetus_liver	138	1230	2.58848e-20	2.35552e-18	ENSBTAG00000006599;ENSBTAG00000011738;ENSBTAG00000038757;ENSBTAG00000015735;ENSBTAG00000014197;ENSBTAG00000011036;ENSBTAG00000008774;ENSBTAG00000012104;ENSBTAG00000010215;ENSBTAG00000008197;ENSBTAG00000020229;ENSBTAG00000016249;ENSBTAG00000038844;ENSBTAG00000012280;ENSBTAG00000017056;ENSBTAG00000017335;ENSBTAG00000001562;ENSBTAG00000004674;ENSBTAG00000023411;ENSBTAG00000018137;ENSBTAG00000022920;…
Lymph_nodes	138	1230	2.58848e-20	2.35552e-18	ENSBTAG00000003313;ENSBTAG00000004270;ENSBTAG00000019796;ENSBTAG00000019567;ENSBTAG00000001029;ENSBTAG00000012695;ENSBTAG00000021219;ENSBTAG00000007826;ENSBTAG00000034295;ENSBTAG00000004894;ENSBTAG00000021249;ENSBTAG00000020772;ENSBTAG00000038639;ENSBTAG00000015297;ENSBTAG00000013133;ENSBTAG00000008436;ENSBTAG00000039355;ENSBTAG00000018984;ENSBTAG00000010527;ENSBTAG00000008631;ENSBTAG00000020904;…
Eye	133	1230	3.13528e-18	2.8531e-16	ENSBTAG00000020896;ENSBTAG00000019546;ENSBTAG00000004019;ENSBTAG00000012823;ENSBTAG00000015412;ENSBTAG00000014486;ENSBTAG00000033699;ENSBTAG00000002599;ENSBTAG00000004854;ENSBTAG00000045626;ENSBTAG00000012909;ENSBTAG00000005377;ENSBTAG00000038711;ENSBTAG00000021844;ENSBTAG00000027409;ENSBTAG00000010175;ENSBTAG00000006472;ENSBTAG00000020893;ENSBTAG00000008714;ENSBTAG00000019249;ENSBTAG00000018077;…
Skin	132	1230	7.96059e-18	7.24413e-16	ENSBTAG00000013239;ENSBTAG00000038325;ENSBTAG00000046742;ENSBTAG00000010070;ENSBTAG00000013095;ENSBTAG00000017946;ENSBTAG00000031538;ENSBTAG00000032059;ENSBTAG00000012043;ENSBTAG00000011634;ENSBTAG00000046365;ENSBTAG00000007583;ENSBTAG00000012584;ENSBTAG00000015412;ENSBTAG00000038844;ENSBTAG00000046587;ENSBTAG00000020190;ENSBTAG00000033423;ENSBTAG00000012031;ENSBTAG00000018077;ENSBTAG00000000585;…
Bulbourethral_gland	128	1230	3.01275e-16	2.7416e-14	ENSBTAG00000012043;ENSBTAG00000018399;ENSBTAG00000002599;ENSBTAG00000013095;ENSBTAG00000012823;ENSBTAG00000008102;ENSBTAG00000009014;ENSBTAG00000007741;ENSBTAG00000012584;ENSBTAG00000016913;ENSBTAG00000015412;ENSBTAG00000022142;ENSBTAG00000006156;ENSBTAG00000034384;ENSBTAG00000032481;ENSBTAG00000007583;ENSBTAG00000020896;ENSBTAG00000038844;ENSBTAG00000045626;ENSBTAG00000012909;ENSBTAG00000031538;…
Isthmus	127	1230	7.29773e-16	6.64093e-14	ENSBTAG00000012461;ENSBTAG00000015493;ENSBTAG00000008693;ENSBTAG00000046703;ENSBTAG00000001388;ENSBTAG00000020415;ENSBTAG00000008538;ENSBTAG00000016574;ENSBTAG00000019402;ENSBTAG00000019958;ENSBTAG00000004197;ENSBTAG00000001367;ENSBTAG00000016854;ENSBTAG00000006961;ENSBTAG00000040316;ENSBTAG00000006069;ENSBTAG00000004617;ENSBTAG00000008858;ENSBTAG00000026708;ENSBTAG00000021216;ENSBTAG00000012621;…
CD4_cell	126	1230	1.75087e-15	1.59329e-13	ENSBTAG00000008436;ENSBTAG00000012695;ENSBTAG00000021219;ENSBTAG00000013133;ENSBTAG00000001029;ENSBTAG00000018946;ENSBTAG00000010527;ENSBTAG00000003014;ENSBTAG00000008556;ENSBTAG00000019961;ENSBTAG00000007661;ENSBTAG00000015632;ENSBTAG00000021249;ENSBTAG00000046699;ENSBTAG00000008631;ENSBTAG00000004270;ENSBTAG00000019567;ENSBTAG00000011981;ENSBTAG00000030523;ENSBTAG00000018984;ENSBTAG00000002127;…
Omasum	126	1230	1.75087e-15	1.59329e-13	ENSBTAG00000022142;ENSBTAG00000004468;ENSBTAG00000032059;ENSBTAG00000031538;ENSBTAG00000000660;ENSBTAG00000007583;ENSBTAG00000046365;ENSBTAG00000019249;ENSBTAG00000006156;ENSBTAG00000000161;ENSBTAG00000032481;ENSBTAG00000015046;ENSBTAG00000018077;ENSBTAG00000000585;ENSBTAG00000046350;ENSBTAG00000005776;ENSBTAG00000017132;ENSBTAG00000004903;ENSBTAG00000033423;ENSBTAG00000008493;ENSBTAG00000014774;…
Uterus	126	1230	1.75087e-15	1.59329e-13	ENSBTAG00000012461;ENSBTAG00000020415;ENSBTAG00000026708;ENSBTAG00000015493;ENSBTAG00000021216;ENSBTAG00000019958;ENSBTAG00000009014;ENSBTAG00000004650;ENSBTAG00000008693;ENSBTAG00000008097;ENSBTAG00000027434;ENSBTAG00000001388;ENSBTAG00000021570;ENSBTAG00000006579;ENSBTAG00000016072;ENSBTAG00000007550;ENSBTAG00000014132;ENSBTAG00000010647;ENSBTAG00000004617;ENSBTAG00000036102;ENSBTAG00000013848;…
Nasal_mucosa	125	1230	4.16043e-15	3.78599e-13	ENSBTAG00000045626;ENSBTAG00000014486;ENSBTAG00000014456;ENSBTAG00000015412;ENSBTAG00000032059;ENSBTAG00000012909;ENSBTAG00000000496;ENSBTAG00000020852;ENSBTAG00000031532;ENSBTAG00000001917;ENSBTAG00000019277;ENSBTAG00000007583;ENSBTAG00000023374;ENSBTAG00000001136;ENSBTAG00000013320;ENSBTAG00000008493;ENSBTAG00000014806;ENSBTAG00000012104;ENSBTAG00000017040;ENSBTAG00000002779;ENSBTAG00000004903;…
Urethra	120	1230	2.72241e-13	2.47739e-11	ENSBTAG00000009913;ENSBTAG00000020622;ENSBTAG00000009014;ENSBTAG00000022142;ENSBTAG00000000644;ENSBTAG00000013848;ENSBTAG00000018465;ENSBTAG00000007164;ENSBTAG00000014456;ENSBTAG00000015988;ENSBTAG00000013176;ENSBTAG00000008756;ENSBTAG00000017132;ENSBTAG00000015232;ENSBTAG00000008493;ENSBTAG00000021282;ENSBTAG00000021430;ENSBTAG00000013320;ENSBTAG00000003498;ENSBTAG00000007129;ENSBTAG00000020548;…
Larynx_cartilage	116	1230	6.45273e-12	5.87198e-10	ENSBTAG00000004630;ENSBTAG00000018399;ENSBTAG00000014969;ENSBTAG00000020622;ENSBTAG00000014381;ENSBTAG00000024492;ENSBTAG00000005714;ENSBTAG00000021777;ENSBTAG00000011275;ENSBTAG00000015702;ENSBTAG00000006232;ENSBTAG00000006999;ENSBTAG00000004019;ENSBTAG00000001139;ENSBTAG00000006419;ENSBTAG00000047491;ENSBTAG00000022244;ENSBTAG00000032709;ENSBTAG00000006081;ENSBTAG00000019327;ENSBTAG00000017901;…
Adipose	114	1230	2.95527e-11	2.6893e-09	ENSBTAG00000018566;ENSBTAG00000031532;ENSBTAG00000000644;ENSBTAG00000044073;ENSBTAG00000001154;ENSBTAG00000013848;ENSBTAG00000010179;ENSBTAG00000031184;ENSBTAG00000006234;ENSBTAG00000013004;ENSBTAG00000001367;ENSBTAG00000009913;ENSBTAG00000019726;ENSBTAG00000006024;ENSBTAG00000025402;ENSBTAG00000032591;ENSBTAG00000021904;ENSBTAG00000006877;ENSBTAG00000001444;ENSBTAG00000003832;ENSBTAG00000006789;…
Ureter	113	1230	6.22718e-11	5.66674e-09	ENSBTAG00000007353;ENSBTAG00000000124;ENSBTAG00000027409;ENSBTAG00000004468;ENSBTAG00000037558;ENSBTAG00000037778;ENSBTAG00000007741;ENSBTAG00000017746;ENSBTAG00000013848;ENSBTAG00000006789;ENSBTAG00000006024;ENSBTAG00000017537;ENSBTAG00000009014;ENSBTAG00000004630;ENSBTAG00000001367;ENSBTAG00000019212;ENSBTAG00000012035;ENSBTAG00000012630;ENSBTAG00000001444;ENSBTAG00000011824;ENSBTAG00000019347;…
Lung	112	1230	1.29855e-10	1.18168e-08	ENSBTAG00000008483;ENSBTAG00000015235;ENSBTAG00000005238;ENSBTAG00000004197;ENSBTAG00000001152;ENSBTAG00000017981;ENSBTAG00000002779;ENSBTAG00000003711;ENSBTAG00000006730;ENSBTAG00000046574;ENSBTAG00000019212;ENSBTAG00000017132;ENSBTAG00000006073;ENSBTAG00000002469;ENSBTAG00000001447;ENSBTAG00000006716;ENSBTAG00000003923;ENSBTAG00000003531;ENSBTAG00000038735;ENSBTAG00000006546;ENSBTAG00000012035;…
Adrenal	108	1230	2.20945e-09	2.0106e-07	ENSBTAG00000014335;ENSBTAG00000009836;ENSBTAG00000040399;ENSBTAG00000002599;ENSBTAG00000015715;ENSBTAG00000004888;ENSBTAG00000020880;ENSBTAG00000021282;ENSBTAG00000020939;ENSBTAG00000027409;ENSBTAG00000012909;ENSBTAG00000020984;ENSBTAG00000004399;ENSBTAG00000020415;ENSBTAG00000020548;ENSBTAG00000010907;ENSBTAG00000004599;ENSBTAG00000019658;ENSBTAG00000001444;ENSBTAG00000001675;ENSBTAG00000018082;…
CD8_cell	108	1230	2.20945e-09	2.0106e-07	ENSBTAG00000004270;ENSBTAG00000018946;ENSBTAG00000008436;ENSBTAG00000034295;ENSBTAG00000007661;ENSBTAG00000012695;ENSBTAG00000008956;ENSBTAG00000008556;ENSBTAG00000008631;ENSBTAG00000021219;ENSBTAG00000013133;ENSBTAG00000003014;ENSBTAG00000024492;ENSBTAG00000001029;ENSBTAG00000010527;ENSBTAG00000037558;ENSBTAG00000040190;ENSBTAG00000026326;ENSBTAG00000008004;ENSBTAG00000018984;ENSBTAG00000008092;…
Fetus_Kidney	105	1230	1.65356e-08	1.50474e-06	ENSBTAG00000005072;ENSBTAG00000001026;ENSBTAG00000004766;ENSBTAG00000017285;ENSBTAG00000009913;ENSBTAG00000014486;ENSBTAG00000043553;ENSBTAG00000004710;ENSBTAG00000019907;ENSBTAG00000000986;ENSBTAG00000006730;ENSBTAG00000016881;ENSBTAG00000015235;ENSBTAG00000014821;ENSBTAG00000003449;ENSBTAG00000013760;ENSBTAG00000018158;ENSBTAG00000005675;ENSBTAG00000007348;ENSBTAG00000012863;ENSBTAG00000019354;…
Vesicular_gland	105	1230	1.65356e-08	1.50474e-06	ENSBTAG00000027409;ENSBTAG00000000644;ENSBTAG00000004019;ENSBTAG00000016651;ENSBTAG00000018566;ENSBTAG00000021862;ENSBTAG00000019726;ENSBTAG00000001154;ENSBTAG00000010179;ENSBTAG00000006234;ENSBTAG00000005337;ENSBTAG00000021904;ENSBTAG00000013004;ENSBTAG00000004432;ENSBTAG00000002585;ENSBTAG00000039618;ENSBTAG00000021097;ENSBTAG00000006789;ENSBTAG00000025402;ENSBTAG00000031184;ENSBTAG00000031532;…
Thyroid	104	1230	3.16448e-08	2.87968e-06	ENSBTAG00000032301;ENSBTAG00000014335;ENSBTAG00000019354;ENSBTAG00000046574;ENSBTAG00000001152;ENSBTAG00000040316;ENSBTAG00000038139;ENSBTAG00000006069;ENSBTAG00000002585;ENSBTAG00000018566;ENSBTAG00000018158;ENSBTAG00000002123;ENSBTAG00000004572;ENSBTAG00000010270;ENSBTAG00000004494;ENSBTAG00000004221;ENSBTAG00000013531;ENSBTAG00000016739;ENSBTAG00000045754;ENSBTAG00000014355;ENSBTAG00000001153;…
Infundibulum	103	1230	5.98943e-08	5.45038e-06	ENSBTAG00000015493;ENSBTAG00000004617;ENSBTAG00000008538;ENSBTAG00000008693;ENSBTAG00000004197;ENSBTAG00000002470;ENSBTAG00000018560;ENSBTAG00000016854;ENSBTAG00000001917;ENSBTAG00000019402;ENSBTAG00000011888;ENSBTAG00000034384;ENSBTAG00000006069;ENSBTAG00000006961;ENSBTAG00000014355;ENSBTAG00000032733;ENSBTAG00000030667;ENSBTAG00000012688;ENSBTAG00000012921;ENSBTAG00000002115;ENSBTAG00000012348;…
Rumen	102	1230	1.12108e-07	1.02018e-05	ENSBTAG00000022142;ENSBTAG00000019249;ENSBTAG00000031538;ENSBTAG00000032059;ENSBTAG00000046365;ENSBTAG00000007583;ENSBTAG00000000161;ENSBTAG00000002070;ENSBTAG00000046350;ENSBTAG00000008331;ENSBTAG00000015046;ENSBTAG00000018077;ENSBTAG00000004468;ENSBTAG00000032481;ENSBTAG00000033423;ENSBTAG00000014774;ENSBTAG00000000376;ENSBTAG00000006156;ENSBTAG00000000585;ENSBTAG00000015232;ENSBTAG00000017132;…
Ascending_colon	101	1230	2.07502e-07	1.88827e-05	ENSBTAG00000019722;ENSBTAG00000014456;ENSBTAG00000000496;ENSBTAG00000017864;ENSBTAG00000021964;ENSBTAG00000032761;ENSBTAG00000015046;ENSBTAG00000008331;ENSBTAG00000012104;ENSBTAG00000026836;ENSBTAG00000016042;ENSBTAG00000039355;ENSBTAG00000012284;ENSBTAG00000013569;ENSBTAG00000005675;ENSBTAG00000016588;ENSBTAG00000017335;ENSBTAG00000009836;ENSBTAG00000013320;ENSBTAG00000014806;ENSBTAG00000017132;…
Spleen	101	1230	2.07502e-07	1.88827e-05	ENSBTAG00000007826;ENSBTAG00000003313;ENSBTAG00000004270;ENSBTAG00000012695;ENSBTAG00000019796;ENSBTAG00000001029;ENSBTAG00000005892;ENSBTAG00000019567;ENSBTAG00000000987;ENSBTAG00000006453;ENSBTAG00000006223;ENSBTAG00000021219;ENSBTAG00000008631;ENSBTAG00000006452;ENSBTAG00000015297;ENSBTAG00000021249;ENSBTAG00000004894;ENSBTAG00000008021;ENSBTAG00000039355;ENSBTAG00000018984;ENSBTAG00000034295;…
Ampulla	100	1230	3.79761e-07	3.45582e-05	ENSBTAG00000015493;ENSBTAG00000008538;ENSBTAG00000008693;ENSBTAG00000006961;ENSBTAG00000016854;ENSBTAG00000004617;ENSBTAG00000002470;ENSBTAG00000034384;ENSBTAG00000001917;ENSBTAG00000019402;ENSBTAG00000004197;ENSBTAG00000001388;ENSBTAG00000021216;ENSBTAG00000006069;ENSBTAG00000037693;ENSBTAG00000008858;ENSBTAG00000014102;ENSBTAG00000012688;ENSBTAG00000018560;ENSBTAG00000021272;ENSBTAG00000019958;…
Ovary	97	1230	2.17398e-06	0.000197832	ENSBTAG00000026708;ENSBTAG00000009014;ENSBTAG00000032591;ENSBTAG00000013176;ENSBTAG00000001675;ENSBTAG00000040253;ENSBTAG00000004617;ENSBTAG00000003060;ENSBTAG00000000672;ENSBTAG00000003329;ENSBTAG00000031849;ENSBTAG00000021844;ENSBTAG00000016766;ENSBTAG00000018031;ENSBTAG00000006024;ENSBTAG00000016854;ENSBTAG00000020939;ENSBTAG00000002599;ENSBTAG00000017482;ENSBTAG00000046256;ENSBTAG00000020028;…
Colon	96	1230	3.8003e-06	0.000345827	ENSBTAG00000019722;ENSBTAG00000000496;ENSBTAG00000014456;ENSBTAG00000008331;ENSBTAG00000020190;ENSBTAG00000015046;ENSBTAG00000017864;ENSBTAG00000021964;ENSBTAG00000012584;ENSBTAG00000012104;ENSBTAG00000040316;ENSBTAG00000015988;ENSBTAG00000009836;ENSBTAG00000013320;ENSBTAG00000007502;ENSBTAG00000012284;ENSBTAG00000017132;ENSBTAG00000005675;ENSBTAG00000033886;ENSBTAG00000000986;ENSBTAG00000014806;…
Kidney	96	1230	3.8003e-06	0.000345827	ENSBTAG00000005072;ENSBTAG00000001026;ENSBTAG00000004766;ENSBTAG00000003054;ENSBTAG00000018647;ENSBTAG00000019907;ENSBTAG00000013898;ENSBTAG00000043553;ENSBTAG00000006779;ENSBTAG00000007348;ENSBTAG00000019354;ENSBTAG00000004710;ENSBTAG00000015387;ENSBTAG00000004674;ENSBTAG00000017461;ENSBTAG00000000986;ENSBTAG00000013320;ENSBTAG00000011680;ENSBTAG00000014821;ENSBTAG00000032301;ENSBTAG00000006730;…
Fetus_muscle	95	1230	6.56621e-06	0.000597525	ENSBTAG00000015702;ENSBTAG00000011530;ENSBTAG00000006907;ENSBTAG00000000419;ENSBTAG00000018399;ENSBTAG00000011010;ENSBTAG00000011617;ENSBTAG00000011500;ENSBTAG00000026836;ENSBTAG00000020223;ENSBTAG00000046332;ENSBTAG00000020190;ENSBTAG00000006999;ENSBTAG00000000987;ENSBTAG00000006419;ENSBTAG00000003512;ENSBTAG00000003956;ENSBTAG00000005714;ENSBTAG00000048157;ENSBTAG00000022244;ENSBTAG00000001032;…
Kidney_Cortex	94	1230	1.12127e-05	0.00102036	ENSBTAG00000005072;ENSBTAG00000001026;ENSBTAG00000004766;ENSBTAG00000003054;ENSBTAG00000018647;ENSBTAG00000004674;ENSBTAG00000000986;ENSBTAG00000006779;ENSBTAG00000015387;ENSBTAG00000019546;ENSBTAG00000009983;ENSBTAG00000004710;ENSBTAG00000043553;ENSBTAG00000014821;ENSBTAG00000019907;ENSBTAG00000014791;ENSBTAG00000017056;ENSBTAG00000011680;ENSBTAG00000009913;ENSBTAG00000006730;ENSBTAG00000001000;…
White_blood_cells	94	1230	1.12127e-05	0.00102036	ENSBTAG00000018946;ENSBTAG00000008436;ENSBTAG00000001029;ENSBTAG00000004270;ENSBTAG00000002127;ENSBTAG00000010527;ENSBTAG00000030523;ENSBTAG00000007661;ENSBTAG00000008631;ENSBTAG00000013133;ENSBTAG00000008556;ENSBTAG00000016424;ENSBTAG00000008004;ENSBTAG00000015297;ENSBTAG00000015375;ENSBTAG00000021219;ENSBTAG00000020772;ENSBTAG00000001562;ENSBTAG00000005018;ENSBTAG00000013702;ENSBTAG00000001235;…
Milk_cells	93	1230	1.89223e-05	0.00172193	ENSBTAG00000027513;ENSBTAG00000019716;ENSBTAG00000026753;ENSBTAG00000037558;ENSBTAG00000001042;ENSBTAG00000008004;ENSBTAG00000016424;ENSBTAG00000031430;ENSBTAG00000017674;ENSBTAG00000001864;ENSBTAG00000003014;ENSBTAG00000037735;ENSBTAG00000005018;ENSBTAG00000031814;ENSBTAG00000009786;ENSBTAG00000040190;ENSBTAG00000037811;ENSBTAG00000016944;ENSBTAG00000000816;ENSBTAG00000004270;ENSBTAG00000011044;…
Liver	92	1230	3.15549e-05	0.00287149	ENSBTAG00000006599;ENSBTAG00000011738;ENSBTAG00000014197;ENSBTAG00000008774;ENSBTAG00000015086;ENSBTAG00000020229;ENSBTAG00000016249;ENSBTAG00000026502;ENSBTAG00000015735;ENSBTAG00000017335;ENSBTAG00000010215;ENSBTAG00000025182;ENSBTAG00000004840;ENSBTAG00000012280;ENSBTAG00000002878;ENSBTAG00000004226;ENSBTAG00000004674;ENSBTAG00000023411;ENSBTAG00000016042;ENSBTAG00000017280;ENSBTAG00000004215;…
Reticulum	86	1230	0.000526207	0.0478848	ENSBTAG00000022142;ENSBTAG00000031538;ENSBTAG00000007583;ENSBTAG00000015046;ENSBTAG00000019249;ENSBTAG00000046365;ENSBTAG00000032059;ENSBTAG00000000161;ENSBTAG00000014774;ENSBTAG00000006156;ENSBTAG00000046350;ENSBTAG00000018077;ENSBTAG00000033423;ENSBTAG00000032481;ENSBTAG00000002070;ENSBTAG00000005776;ENSBTAG00000017132;ENSBTAG00000000376;ENSBTAG00000015232;ENSBTAG00000008331;ENSBTAG00000000585;…
Tail_epididymis	85	1230	0.000805584	0.0733082	ENSBTAG00000014335;ENSBTAG00000003060;ENSBTAG00000015715;ENSBTAG00000003329;ENSBTAG00000003054;ENSBTAG00000000672;ENSBTAG00000026708;ENSBTAG00000004221;ENSBTAG00000002599;ENSBTAG00000005129;ENSBTAG00000046286;ENSBTAG00000001388;ENSBTAG00000020904;ENSBTAG00000020880;ENSBTAG00000006424;ENSBTAG00000036061;ENSBTAG00000021516;ENSBTAG00000019958;ENSBTAG00000016399;ENSBTAG00000013045;ENSBTAG00000006440;…
Anterior_pituitary	84	1230	0.00121795	0.110833	ENSBTAG00000038735;ENSBTAG00000014100;ENSBTAG00000004197;ENSBTAG00000013798;ENSBTAG00000016651;ENSBTAG00000017187;ENSBTAG00000017780;ENSBTAG00000007955;ENSBTAG00000009836;ENSBTAG00000012682;ENSBTAG00000013422;ENSBTAG00000032613;ENSBTAG00000002104;ENSBTAG00000011131;ENSBTAG00000001136;ENSBTAG00000017500;ENSBTAG00000015979;ENSBTAG00000010836;ENSBTAG00000047650;ENSBTAG00000008538;ENSBTAG00000002908;…
Atrium	83	1230	0.00181834	0.165469	ENSBTAG00000009155;ENSBTAG00000006424;ENSBTAG00000005714;ENSBTAG00000011500;ENSBTAG00000014381;ENSBTAG00000021777;ENSBTAG00000002194;ENSBTAG00000002772;ENSBTAG00000003512;ENSBTAG00000040042;ENSBTAG00000004004;ENSBTAG00000004888;ENSBTAG00000015235;ENSBTAG00000019327;ENSBTAG00000001580;ENSBTAG00000014548;ENSBTAG00000044078;ENSBTAG00000016048;ENSBTAG00000011981;ENSBTAG00000020223;ENSBTAG00000046332;…
Kidney_Medulla	83	1230	0.00181834	0.165469	ENSBTAG00000005072;ENSBTAG00000004766;ENSBTAG00000001026;ENSBTAG00000015387;ENSBTAG00000004710;ENSBTAG00000018647;ENSBTAG00000017461;ENSBTAG00000009983;ENSBTAG00000019907;ENSBTAG00000043553;ENSBTAG00000003054;ENSBTAG00000006779;ENSBTAG00000013320;ENSBTAG00000014821;ENSBTAG00000000986;ENSBTAG00000001000;ENSBTAG00000004674;ENSBTAG00000019546;ENSBTAG00000007348;ENSBTAG00000010270;ENSBTAG00000004572;…
Aorta	76	1230	0.0210143	1	ENSBTAG00000011275;ENSBTAG00000040253;ENSBTAG00000018465;ENSBTAG00000017537;ENSBTAG00000013760;ENSBTAG00000006676;ENSBTAG00000013147;ENSBTAG00000007129;ENSBTAG00000015988;ENSBTAG00000002391;ENSBTAG00000017187;ENSBTAG00000007772;ENSBTAG00000030705;ENSBTAG00000006234;ENSBTAG00000020939;ENSBTAG00000005714;ENSBTAG00000011680;ENSBTAG00000012897;ENSBTAG00000008921;ENSBTAG00000002772;ENSBTAG00000006024;…
Bone_marrow	76	1230	0.0210143	1	ENSBTAG00000024497;ENSBTAG00000018566;ENSBTAG00000017981;ENSBTAG00000010179;ENSBTAG00000015059;ENSBTAG00000010175;ENSBTAG00000017946;ENSBTAG00000006232;ENSBTAG00000031184;ENSBTAG00000019726;ENSBTAG00000001154;ENSBTAG00000001004;ENSBTAG00000002469;ENSBTAG00000016881;ENSBTAG00000030278;ENSBTAG00000018142;ENSBTAG00000012265;ENSBTAG00000006234;ENSBTAG00000006349;ENSBTAG00000046256;ENSBTAG00000004432;…
Chorid_plexus	10	1230	1	1	ENSBTAG00000020080;ENSBTAG00000022244;ENSBTAG00000010652;ENSBTAG00000006999;ENSBTAG00000047491;ENSBTAG00000007281;ENSBTAG00000006907;ENSBTAG00000015702;ENSBTAG00000003512;ENSBTAG00000020916
Corpus_Luteum	60	1230	0.525744	1	ENSBTAG00000003060;ENSBTAG00000015316;ENSBTAG00000001324;ENSBTAG00000013663;ENSBTAG00000009545;ENSBTAG00000009014;ENSBTAG00000003054;ENSBTAG00000016399;ENSBTAG00000002579;ENSBTAG00000002599;ENSBTAG00000008714;ENSBTAG00000009641;ENSBTAG00000006440;ENSBTAG00000021516;ENSBTAG00000017537;ENSBTAG00000016766;ENSBTAG00000021899;ENSBTAG00000008160;ENSBTAG00000021485;ENSBTAG00000046699;ENSBTAG00000001675;…
Endometrium	76	1230	0.0210143	1	ENSBTAG00000015493;ENSBTAG00000021216;ENSBTAG00000012461;ENSBTAG00000015316;ENSBTAG00000008693;ENSBTAG00000020415;ENSBTAG00000006579;ENSBTAG00000040316;ENSBTAG00000021899;ENSBTAG00000008538;ENSBTAG00000002579;ENSBTAG00000016854;ENSBTAG00000034384;ENSBTAG00000027434;ENSBTAG00000004468;ENSBTAG00000013680;ENSBTAG00000005448;ENSBTAG00000008160;ENSBTAG00000007554;ENSBTAG00000004710;ENSBTAG00000004617;…
Epididymis	34	1230	0.99995	1	ENSBTAG00000023146;ENSBTAG00000036102;ENSBTAG00000016283;ENSBTAG00000034138;ENSBTAG00000039618;ENSBTAG00000012461;ENSBTAG00000018864;ENSBTAG00000020127;ENSBTAG00000016399;ENSBTAG00000015829;ENSBTAG00000011381;ENSBTAG00000011634;ENSBTAG00000015735;ENSBTAG00000005776;ENSBTAG00000011702;ENSBTAG00000010166;ENSBTAG00000003496;ENSBTAG00000007809;ENSBTAG00000019354;ENSBTAG00000006949;ENSBTAG00000031886;…
Fetus_testes	67	1230	0.191681	1	ENSBTAG00000015715;ENSBTAG00000023146;ENSBTAG00000000124;ENSBTAG00000014335;ENSBTAG00000020127;ENSBTAG00000004766;ENSBTAG00000020880;ENSBTAG00000046703;ENSBTAG00000039618;ENSBTAG00000038711;ENSBTAG00000020622;ENSBTAG00000006949;ENSBTAG00000021570;ENSBTAG00000013760;ENSBTAG00000020415;ENSBTAG00000026708;ENSBTAG00000015235;ENSBTAG00000020548;ENSBTAG00000005150;ENSBTAG00000001152;ENSBTAG00000012035;…
Follicle	70	1230	0.103143	1	ENSBTAG00000040253;ENSBTAG00000020127;ENSBTAG00000026708;ENSBTAG00000016399;ENSBTAG00000006631;ENSBTAG00000014335;ENSBTAG00000004617;ENSBTAG00000000672;ENSBTAG00000006625;ENSBTAG00000001927;ENSBTAG00000004078;ENSBTAG00000031849;ENSBTAG00000006024;ENSBTAG00000016208;ENSBTAG00000002391;ENSBTAG00000010647;ENSBTAG00000009014;ENSBTAG00000006424;ENSBTAG00000007348;ENSBTAG00000013176;ENSBTAG00000040169;…
Heart	72	1230	0.0639489	1	ENSBTAG00000006424;ENSBTAG00000009155;ENSBTAG00000005714;ENSBTAG00000011500;ENSBTAG00000021777;ENSBTAG00000003512;ENSBTAG00000014381;ENSBTAG00000004004;ENSBTAG00000016048;ENSBTAG00000044078;ENSBTAG00000002772;ENSBTAG00000002194;ENSBTAG00000015304;ENSBTAG00000014863;ENSBTAG00000004888;ENSBTAG00000001580;ENSBTAG00000019327;ENSBTAG00000026461;ENSBTAG00000004281;ENSBTAG00000030520;ENSBTAG00000015182;…
Lymphocyte	37	1230	0.999679	1	ENSBTAG00000013045;ENSBTAG00000022278;ENSBTAG00000040378;ENSBTAG00000002127;ENSBTAG00000014623;ENSBTAG00000031888;ENSBTAG00000015297;ENSBTAG00000024176;ENSBTAG00000001029;ENSBTAG00000017761;ENSBTAG00000002190;ENSBTAG00000030523;ENSBTAG00000046699;ENSBTAG00000008436;ENSBTAG00000011511;ENSBTAG00000004270;ENSBTAG00000021219;ENSBTAG00000009471;ENSBTAG00000010527;ENSBTAG00000012695;ENSBTAG00000019796;…
Mammary	67	1230	0.191681	1	ENSBTAG00000033580;ENSBTAG00000007741;ENSBTAG00000046703;ENSBTAG00000017694;ENSBTAG00000039046;ENSBTAG00000003498;ENSBTAG00000047078;ENSBTAG00000020936;ENSBTAG00000004903;ENSBTAG00000012054;ENSBTAG00000001927;ENSBTAG00000008779;ENSBTAG00000044155;ENSBTAG00000011010;ENSBTAG00000018158;ENSBTAG00000002123;ENSBTAG00000027407;ENSBTAG00000005776;ENSBTAG00000022150;ENSBTAG00000010175;ENSBTAG00000011680;…
Muscle	59	1230	0.579634	1	ENSBTAG00000022244;ENSBTAG00000020080;ENSBTAG00000006999;ENSBTAG00000015702;ENSBTAG00000006907;ENSBTAG00000020223;ENSBTAG00000047491;ENSBTAG00000010652;ENSBTAG00000046332;ENSBTAG00000007281;ENSBTAG00000019658;ENSBTAG00000019327;ENSBTAG00000001032;ENSBTAG00000013614;ENSBTAG00000015273;ENSBTAG00000001120;ENSBTAG00000006419;ENSBTAG00000010907;ENSBTAG00000011530;ENSBTAG00000006081;ENSBTAG00000016413;…
Prostrate	56	1230	0.730513	1	ENSBTAG00000016651;ENSBTAG00000009891;ENSBTAG00000014456;ENSBTAG00000001136;ENSBTAG00000020852;ENSBTAG00000014806;ENSBTAG00000017797;ENSBTAG00000008155;ENSBTAG00000022715;ENSBTAG00000012909;ENSBTAG00000008858;ENSBTAG00000002599;ENSBTAG00000008952;ENSBTAG00000011702;ENSBTAG00000017943;ENSBTAG00000012104;ENSBTAG00000003403;ENSBTAG00000008575;ENSBTAG00000006035;ENSBTAG00000020344;ENSBTAG00000037693;…
Rumen_ephthelial_cell	65	1230	0.271807	1	ENSBTAG00000017285;ENSBTAG00000020916;ENSBTAG00000036102;ENSBTAG00000003380;ENSBTAG00000013045;ENSBTAG00000006599;ENSBTAG00000025182;ENSBTAG00000016042;ENSBTAG00000006472;ENSBTAG00000015086;ENSBTAG00000023374;ENSBTAG00000026139;ENSBTAG00000017949;ENSBTAG00000022920;ENSBTAG00000002878;ENSBTAG00000010215;ENSBTAG00000014791;ENSBTAG00000036028;ENSBTAG00000012823;ENSBTAG00000005586;ENSBTAG00000021964;…
RumenPapillae	57	1230	0.682905	1	ENSBTAG00000022142;ENSBTAG00000031538;ENSBTAG00000019249;ENSBTAG00000032059;ENSBTAG00000000161;ENSBTAG00000012284;ENSBTAG00000015046;ENSBTAG00000014774;ENSBTAG00000046365;ENSBTAG00000007583;ENSBTAG00000006156;ENSBTAG00000005776;ENSBTAG00000033423;ENSBTAG00000038325;ENSBTAG00000046350;ENSBTAG00000002070;ENSBTAG00000018077;ENSBTAG00000000376;ENSBTAG00000011702;ENSBTAG00000032481;ENSBTAG00000008331;…
Salivary_gland	70	1230	0.103143	1	ENSBTAG00000016651;ENSBTAG00000014456;ENSBTAG00000009891;ENSBTAG00000000496;ENSBTAG00000001917;ENSBTAG00000001136;ENSBTAG00000017943;ENSBTAG00000015981;ENSBTAG00000020880;ENSBTAG00000011702;ENSBTAG00000001139;ENSBTAG00000027409;ENSBTAG00000006961;ENSBTAG00000040111;ENSBTAG00000014453;ENSBTAG00000014178;ENSBTAG00000017797;ENSBTAG00000032059;ENSBTAG00000024814;ENSBTAG00000003403;ENSBTAG00000005002;…
Sperm	2	1230	1	1	ENSBTAG00000020916;ENSBTAG00000036102
Testes	35	1230	0.999904	1	ENSBTAG00000023146;ENSBTAG00000006949;ENSBTAG00000015715;ENSBTAG00000021570;ENSBTAG00000039618;ENSBTAG00000023731;ENSBTAG00000007200;ENSBTAG00000016399;ENSBTAG00000018560;ENSBTAG00000019726;ENSBTAG00000008155;ENSBTAG00000004630;ENSBTAG00000001917;ENSBTAG00000016937;ENSBTAG00000014969;ENSBTAG00000020082;ENSBTAG00000020127;ENSBTAG00000014355;ENSBTAG00000032372;ENSBTAG00000034384;ENSBTAG00000020548;…
Tongue	74	1230	0.0376295	1	ENSBTAG00000013239;ENSBTAG00000006907;ENSBTAG00000005714;ENSBTAG00000016651;ENSBTAG00000019327;ENSBTAG00000006419;ENSBTAG00000046332;ENSBTAG00000020223;ENSBTAG00000006999;ENSBTAG00000015412;ENSBTAG00000014381;ENSBTAG00000013095;ENSBTAG00000047491;ENSBTAG00000045626;ENSBTAG00000001032;ENSBTAG00000016413;ENSBTAG00000004630;ENSBTAG00000038844;ENSBTAG00000019554;ENSBTAG00000010652;ENSBTAG00000007281;…
Trachea	77	1230	0.0153996	1	ENSBTAG00000011275;ENSBTAG00000040253;ENSBTAG00000013760;ENSBTAG00000018465;ENSBTAG00000013147;ENSBTAG00000006676;ENSBTAG00000017537;ENSBTAG00000017187;ENSBTAG00000007129;ENSBTAG00000015988;ENSBTAG00000030705;ENSBTAG00000002391;ENSBTAG00000019347;ENSBTAG00000011680;ENSBTAG00000018726;ENSBTAG00000026836;ENSBTAG00000002626;ENSBTAG00000006234;ENSBTAG00000007772;ENSBTAG00000008102;ENSBTAG00000012897;…
Uterine_myometrium	41	1230	0.997392	1	ENSBTAG00000013760;ENSBTAG00000001388;ENSBTAG00000026708;ENSBTAG00000002123;ENSBTAG00000004650;ENSBTAG00000030190;ENSBTAG00000032761;ENSBTAG00000002391;ENSBTAG00000020415;ENSBTAG00000011680;ENSBTAG00000016208;ENSBTAG00000012848;ENSBTAG00000005377;ENSBTAG00000015988;ENSBTAG00000018103;ENSBTAG00000008160;ENSBTAG00000027434;ENSBTAG00000004956;ENSBTAG00000000570;ENSBTAG00000004570;ENSBTAG00000016399;…
Vas_deferens	75	1230	0.0283046	1	ENSBTAG00000038711;ENSBTAG00000011381;ENSBTAG00000013176;ENSBTAG00000015988;ENSBTAG00000007741;ENSBTAG00000026708;ENSBTAG00000002391;ENSBTAG00000030705;ENSBTAG00000007129;ENSBTAG00000013760;ENSBTAG00000000124;ENSBTAG00000026461;ENSBTAG00000018566;ENSBTAG00000039049;ENSBTAG00000005679;ENSBTAG00000016208;ENSBTAG00000004432;ENSBTAG00000005377;ENSBTAG00000010836;ENSBTAG00000020127;ENSBTAG00000016283;…
Ventricle	71	1230	0.0817464	1	ENSBTAG00000009155;ENSBTAG00000006424;ENSBTAG00000005714;ENSBTAG00000011500;ENSBTAG00000003512;ENSBTAG00000021777;ENSBTAG00000014381;ENSBTAG00000001580;ENSBTAG00000011981;ENSBTAG00000002194;ENSBTAG00000014548;ENSBTAG00000019327;ENSBTAG00000016048;ENSBTAG00000044078;ENSBTAG00000006775;ENSBTAG00000002772;ENSBTAG00000014863;ENSBTAG00000004281;ENSBTAG00000030520;ENSBTAG00000046332;ENSBTAG00000019961;…
