# Supplementary material for: Functional annotation of the cattle genome through systematic discovery and characterization of chromatin states and butyrate-induced variations
Source: BMC Biol. 2019 Aug 16;17:68. doi: 10.1186/s12915-019-0687-8 (PMC6698049; doi:10.1186/s12915-019-0687-8)
Supplement: Supplementary file 7 — Table S6. Significantly differentially methylated regions in rumen epithelial primary cells (REPC) before and after (24 h) butyrate treatment. (XLSX 12 kb) [file 12915_2019_687_MOESM7_ESM.xlsx]

## Sheet: Sheet1
Table S6. Significantly differentially methylated regions in Rumen Epithelial Primary Cells (REPC) before and after (24-h) butyrate treatment
chr	start	end	strand	pvalue	qvalue	meth.diff
chr27	28655001	28655500	*	0.000302388	0.048752	-55.3241	499
chr27	28890001	28890500	*	0.000165437	0.0371797	-54.4118	499
chr10	96912001	96912500	*	0.000206546	0.0397137	-43.1985	499
chr17	51384501	51385000	*	4.34418e-05	0.0165219	-42.2222	499
chr18	51270501	51271000	*	4.01773e-06	0.00297966	-38.2836	499
chr6	5861501	5862000	*	0.000154822	0.0358813	-35.3801	499
chr14	923501	924000	*	2.29066e-05	0.0106176	-33.7399	499
chr8	35872001	35872500	*	4.32407e-06	0.00305415	-32.0313	499
chr24	256501	257000	*	0.00031367	0.0499016	-31.7054	499
chr22	37922001	37922500	*	0.000139548	0.0333847	-28.1402	499
chr2	124757501	124758000	*	7.42203e-05	0.0253171	-27.4966	499
chr11	74260501	74261000	*	2.837e-06	0.00253316	-25.3101	499
chr3	8100001	8100500	*	0.000190228	0.0389966	-25	499
chr2	100653001	100653500	*	2.68036e-06	0.00253316	-23.2893	499
chr20	48550001	48550500	*	3.74706e-06	0.00292519	-21.6545	499
chr22	44628001	44628500	*	4.15822e-07	0.000770963	-21.5174	499
chr7	30024501	30025000	*	3.79102e-05	0.0147975	-19.9033	499
chr8	59159001	59159500	*	2.59887e-11	3.85479e-07	-18.7644	499
chr25	32363001	32363500	*	0.000161873	0.0369384	-16.3678	499
chr27	7205501	7206000	*	0.00012116	0.0309848	-16.1799	499
chr4	41742001	41742500	*	6.84744e-07	0.0011285	-15.6431	499
chr7	31761501	31762000	*	6.96099e-06	0.00430206	-14.7278	499
chr7	31762501	31763000	*	1.99033e-08	5.90435e-05	10.6541	499
chr29	30310501	30311000	*	0.000245339	0.0438434	10.6889	499
chr8	74542501	74543000	*	0.00027643	0.0460693	11.1058	499
chr29	30226001	30226500	*	9.79967e-05	0.0284812	11.4786	499
chr7	105868001	105868500	*	0.000254055	0.0448605	12.6185	499
chr16	55917501	55918000	*	0.000133247	0.0324	12.8772	499
chr2	133349501	133350000	*	0.00029649	0.0483265	15.739	499
chr13	48994501	48995000	*	2.08161e-05	0.0101536	16.5924	499
chr27	28741501	28742000	*	6.20511e-05	0.0223891	20.2313	499
chr19	71001	71500	*	0.000185415	0.0387349	24.6914	499
chr2	92070001	92070500	*	2.72576e-05	0.0122515	27.0522	499
chr4	120646001	120646500	*	0.000204867	0.0397137	27.6136	499
chr19	61937001	61937500	*	0.000170005	0.0376359	30.4689	499
chr3	20813501	20814000	*	1.46575e-06	0.00181174	30.5099	499
chr14	83671001	83671500	*	1.77826e-05	0.00985704	35.0929	499
chr1	145396001	145396500	*	0.000279654	0.0460888	36.5328	499
chr5	54084501	54085000	*	6.59351e-06	0.00425212	37.4517	499
chr6	14839001	14839500	*	0.000216113	0.0405762	42.7885	499
